# Supplementary material for: Programming scheduled self-assembly of circadian materials
Source: Springer Nature journal article supplement (doi:10.1038/s41467-024-55645-5), 2025-01-02
Supplement: MOESM10 [file 41467_2024_55645_MOESM10_ESM.xlsx]

## Sheet: Figure 1C
									Time [s]	55% b-KaiB; Replicate 1	80% b-KaiB; Replicate 1	0% b-KaiB; Replicate 1	55% b-KaiB; Replicate 2	80% b-KaiB; Replicate 2	0% b-KaiB; Replicate 2
									0	187	180	191	177	171	184
									900.1	179	171	182	169	161	176
									1800.1	177	172	183	171	161	177
									2700.1	181	169	184	174	160	179
									3600.2	179	171	183	172	162	177
									4500.2	179	172	182	173	160	178
									5400.2	180	175	184	177	165	180
									6300.2	182	175	185	176	165	180
									7200.2	184	175	186	178	164	181
									8100.2	180	178	186	178	169	183
									9000.3	185	179	185	179	171	182
									9900.3	184	178	187	179	168	178
									10800.3	186	180	188	179	171	183
									11700.3	186	178	189	184	173	182
									12600.3	189	182	190	184	171	184
									13500.3	189	185	190	185	176	184
									14400.3	190	186	192	187	178	186
									15300.4	193	187	190	189	177	186
									16200.4	195	189	191	191	179	187
									17100.4	196	190	193	190	181	189
									18000.4	197	193	191	194	183	190
									18900.4	202	194	194	195	184	191
									19800.5	201	193	193	198	188	190
									20700.5	205	197	197	201	185	192
									21600.5	208	195	195	200	190	192
									22500.5	210	198	198	206	190	195
									23400.5	211	198	201	209	191	197
									24300.5	214	201	200	208	190	196
									25200.5	216	196	201	212	187	199
									26100.6	216	198	201	214	190	197
									27000.6	219	199	203	217	190	198
									27900.6	222	200	204	216	192	201
									28800.6	224	199	204	217	191	201
									29700.6	225	201	206	219	192	201
									30600.6	225	202	206	220	193	204
									31500.7	224	200	207	221	194	202
									32400.7	228	201	208	222	192	202
									33300.7	230	205	209	223	195	203
									34200.7	227	201	209	225	194	204
									35100.7	229	202	210	224	191	207
									36000.7	231	205	211	225	192	207
									36900.7	231	205	212	224	194	206
									37800.8	230	204	210	226	194	204
									38700.8	228	205	209	226	198	205
									39600.8	231	204	209	229	192	207
									40500.8	230	204	207	224	195	205
									41400.8	228	204	209	226	196	205
									42300.9	226	201	206	222	195	201
									43200.9	230	205	206	226	199	204
									44100.9	231	203	206	225	195	202
									45000.9	227	206	205	222	197	202
									45901	227	208	203	224	198	201
									46800.9	227	207	203	222	198	198
									47700.9	227	207	201	219	195	198
									48601	225	208	200	221	199	196
									49501	222	208	198	221	197	196
									50401	220	205	197	219	201	192
									51301	218	205	196	214	198	194
									52201	218	209	197	213	200	191
									53101	216	206	193	212	200	190
									54001.1	215	203	193	209	196	189
									54901.1	212	208	192	209	200	189
									55801.1	210	206	192	205	196	185
									56701.1	207	206	191	203	200	187
									57601.1	203	208	189	200	198	184
									58501.1	202	209	190	198	202	186
									59401.2	198	206	190	199	200	184
									60301.2	199	207	190	194	200	183
									61201.2	198	211	188	194	200	185
									62101.2	194	208	186	190	201	183
									63001.2	193	209	187	190	200	182
									63901.2	188	210	186	187	200	181
									64801.3	189	210	186	185	198	183
									65701.3	186	210	188	186	199	184
									66601.3	185	209	185	187	199	181
									67501.3	184	206	184	181	199	182
									68401.3	185	210	188	182	200	184
									69301.3	181	208	185	179	199	182
									70201.4	183	210	185	182	199	179
									71101.4	181	209	184	179	196	183
									72001.4	179	205	187	175	200	183
									72901.4	181	207	186	179	199	183
									73801.4	181	208	183	176	199	180
									74701.4	180	208	187	179	201	181
									75601.4	179	208	186	175	202	182
									76501.5	180	207	186	176	199	181
									77401.5	179	204	185	175	198	182
									78301.5	178	205	184	176	202	182
									79201.5	179	208	185	177	202	183
									80101.5	179	208	186	179	203	182
									81001.6	180	207	187	173	200	182
									81901.6	180	206	186	176	201	181
									82801.6	178	210	187	177	200	182
									83701.6	179	208	186	177	201	183
									84601.6	178	206	187	175	202	184
									85501.6	178	206	186	177	197	183
									86401.6	178	206	187	177	200	184
									87301.7	179	207	188	179	198	183
									88201.7	178	209	187	176	199	183
									89101.7	180	208	187	177	200	184
									90001.7	181	209	189	179	200	183
									90901.7	179	206	186	177	201	184
									91801.7	182	209	187	176	199	184
									92701.8	180	208	187	176	199	183
									93601.8	180	206	186	178	200	184
									94501.8	181	209	186	177	198	182
									95401.8	178	205	187	179	198	185
									96301.8	182	208	186	178	198	184
									97201.8	182	207	188	177	198	186
									98101.8	183	207	187	179	196	183
									99001.9	183	207	189	181	200	187
									99901.9	184	207	187	181	198	187
									100802	186	207	190	183	200	187
									101702	184	208	189	180	199	187
									102602	185	205	187	181	197	187
									103502	184	209	190	184	198	185
									104402	187	207	190	183	198	188
									105302	188	206	192	184	202	190
									106202	188	208	192	187	200	188
									107102	189	205	196	186	200	189
									108002	190	208	195	185	201	193
									108902	190	204	193	185	200	189
									109802	192	207	194	189	200	194
									110702	191	204	195	188	198	191
									111602	194	208	195	190	197	195
									112502	195	204	197	191	202	194
									113402	195	207	197	194	200	195
									114302	198	204	198	192	201	195
									115202	199	205	199	196	202	198
									116102	199	205	199	196	198	195
									117002	202	206	198	197	196	196
									117902	204	206	201	198	200	196
									118802	203	210	200	198	201	196
									119702	204	205	202	200	198	196
									120602	206	207	201	201	201	200
									121502	207	207	202	203	199	199
									122402	209	205	200	204	199	198
									123302	206	204	202	200	197	197
									124202	209	208	202	208	201	200
									125102	210	207	202	205	200	199
									126002	210	208	202	207	201	197
									126902	209	206	200	204	199	197
									127802	210	205	201	207	199	201
									128702	210	205	200	206	199	196
									129602	211	206	200	205	198	196
									130502	211	208	201	207	200	197
									131402	213	206	198	210	199	197
									132302	211	207	197	206	199	194
									133202	210	208	197	204	196	195
									134102	210	209	197	206	200	192
									135002	211	206	196	205	200	192
									135902	209	207	195	205	201	193
									136802	210	206	195	206	202	192
									137702	209	210	194	207	201	192
									138603	206	206	193	203	198	189
									139503	206	208	192	201	198	188
									140403	206	206	190	202	201	189
									141303	204	207	191	202	201	190
									142203	200	209	189	201	204	189
									143103	199	206	189	200	200	189
									144003	202	209	192	198	199	186
									144903	198	208	189	197	200	187
									145803	196	207	188	193	199	186
									146703	193	205	187	190	197	184
									147603	192	206	188	191	201	184
									148503	191	207	187	191	202	188
									149403	191	207	186	189	201	183
									150303	191	207	186	186	201	185
									151203	186	208	188	187	201	182
									152103	190	208	188	188	200	183
									153003	187	206	187	186	198	184
									153903	186	206	186	184	200	184
									154803	187	207	187	182	199	184
									155703	183	207	187	181	196	183
									156603	185	208	188	181	200	182
									157503	183	206	187	181	201	183
									158403	182	207	185	180	201	183
									159303	181	206	184	180	200	181
									160203	179	206	185	179	198	184
									161103	180	206	187	178	201	184
									162003	181	209	186	177	199	182
									162903	179	205	186	177	200	182
									163803	178	203	186	180	197	181
									164703	181	206	187	178	201	182
									165603	180	206	187	178	201	181
									166503	180	209	186	178	201	184
									167403	180	206	186	176	198	182
									168303	181	206	186	178	199	183
									169203	181	209	187	180	201	185
									170103	179	208	186	178	199	182
									171003	180	209	186	181	197	186
									171903	179	206	186	178	198	183
									172803	182	208	188	180	202	186
									173703	179	209	188	181	198	183
									174603	181	208	188	178	198	185
									175503	179	208	186	175	199	184
									176403	179	208	188	178	200	185
									177303	182	206	190	179	199	184
									178203	181	211	189	177	200	186
									179103	183	209	189	179	202	187
									180003	183	208	188	181	201	186
									180903	182	208	188	179	200	187
									181803	183	209	189	180	203	185
									182703	181	207	190	180	198	184
									183603	182	209	189	181	200	189
									184503	183	210	189	181	198	188
									185403	183	208	192	179	201	187
									186303	184	211	190	183	201	188
									187203	186	210	192	184	202	190
									188103	186	212	193	181	201	190
									189004	186	210	192	184	203	189
									189904	187	208	192	183	203	189
									190804	188	212	193	188	204	194
									191704	189	207	193	185	203	190
									192604	189	209	194	188	206	192
									193504	190	211	196	188	204	194
									194404	190	209	196	189	207	194
									195304	191	207	198	188	203	195
									196204	189	212	198	189	199	193
									197104	194	211	198	190	201	198
									198004	194	210	198	189	204	195
									198904	196	211	200	192	207	196
									199804	196	212	200	191	202	198
									200704	197	209	202	193	202	199
									201604	197	211	201	196	204	199
									202504	197	210	202	195	205	199
									203404	199	211	203	196	202	198
									204304	200	210	203	196	206	198
									205204	201	209	201	198	204	202
									206104	202	210	202	199	202	201
									207004	203	212	204	201	206	201
									207904	202	210	202	199	200	200
									208804	203	209	201	200	204	199
									209704	205	210	204	200	203	200
									210604	206	210	203	202	202	203
									211504	205	208	202	204	205	200
									212404	207	207	203	204	199	200
									213304	209	210	200	205	203	198
									214204	208	211	201	202	203	200
									215104	206	206	201	202	200	195
									216004	208	210	200	206	203	198
									216904	209	209	198	205	203	197
									217804	209	210	199	207	201	197
									218704	209	208	198	203	202	195
									219604	211	209	197	204	203	195
									220504	210	210	198	205	204	196
									221404	208	208	196	207	201	194
									222304	209	210	197	208	207	195
									223204	207	213	198	209	207	197
									224104	209	210	196	207	204	194
									225004	207	212	194	208	204	194
									225904	209	212	194	205	206	193
									226804	205	212	193	208	203	195
									227704	204	212	194	203	205	192
									228604	207	210	193	204	206	191
									229504	206	214	194	203	203	191
									230404	203	211	193	204	206	192
									231304	204	209	193	204	206	192
									232204	202	211	194	200	206	191
									233104	201	212	192	200	205	189
									234004	199	212	192	199	207	190
									234904	198	213	192	199	205	189
									235804	198	211	190	197	207	193
									236704	194	210	190	195	204	188
									237604	196	210	191	193	208	191
									238504	195	210	190	193	206	189
									239404	195	210	190	194	205	188
									240304	194	215	190	195	207	191
									241204	192	212	190	193	206	187
									242104	190	210	189	192	204	189
									243004	192	213	190	189	205	189
									243904	189	212	191	190	205	188
									244804	188	212	191	190	205	187
									245704	190	212	190	188	206	189
									246604	187	211	190	187	206	188
									247504	187	212	190	187	207	189
									248404	189	212	188	186	206	186
									249304	187	213	191	185	206	187
									250205	188	212	189	186	207	185
									251105	185	211	190	189	204	187
									252005	187	211	190	185	210	188
									252905	186	211	189	185	203	187
									253805	186	213	188	184	205	188
									254705	188	211	189	184	206	188
									255605	185	211	189	183	205	187
									256505	184	210	190	184	207	186
									257405	186	212	190	183	206	189
									258305	184	213	191	185	206	185
									259205	188	212	189	189	207	190
									260105	185	211	190	185	207	186
									261005	185	212	190	182	206	188
									261905	185	212	189	183	206	188
									262805	185	215	190	185	202	189
									263705	185	212	191	184	208	187
									264605	183	212	189	184	206	188
									265505	185	213	189	184	206	187
									266405	184	212	192	186	205	188
									267305	184	211	190	184	206	189
									268205	186	210	193	183	207	189
									269105	184	211	191	185	206	186
									270005	187	213	192	184	210	189
									270905	188	210	193	183	207	191
									271805	186	211	192	184	207	189
									272705	184	212	192	184	206	188
									273605	187	210	193	185	206	192
									274505	187	210	192	186	205	188
									275405	186	210	195	185	205	190
									276305	185	210	194	185	207	192
									277205	187	213	193	186	206	192
									278105	188	213	194	186	206	193
									279005	190	213	195	188	206	194
									279905	190	212	196	189	208	193
									280805	189	210	195	189	203	192
									281705	190	212	197	187	207	192
									282605	188	210	197	186	204	192
									283505	189	212	197	191	206	193
									284405	190	213	197	191	205	195
									285305	192	209	198	188	202	194
									286205	192	211	198	189	206	197
									287105	192	210	198	189	204	195
									288005	192	212	200	194	207	198
									288905	195	211	199	192	208	197
									289805	194	213	199	192	207	200
									290705	193	211	200	192	205	196
									291605	196	210	201	190	204	195
									292505	197	210	203	195	206	198
									293405	198	210	200	194	203	197
									294305	197	209	200	197	208	198
									295205	200	213	200	196	205	196
									296105	197	209	200	196	204	197
									297005	199	211	201	199	205	197
									297905	197	210	198	197	205	196
									298805	202	210	201	200	203	195
									299705	200	211	199	198	204	198
									300606	202	211	199	198	203	196
									301506	201	209	198	198	204	196
									302406	203	207	198	200	203	196
									303306	202	209	198	200	202	194
									304206	203	208	196	201	205	194
									305106	203	209	196	200	201	194
									306006	204	211	196	201	203	193
									306906	204	211	195	199	206	193
									307806	203	209	196	204	201	193
									308706	203	207	194	198	202	190
									309606	202	210	193	202	201	190
									310506	204	211	192	200	203	190
									311406	202	207	193	203	204	192
									312306	204	209	193	204	205	190
									313206	204	208	191	202	202	190
									314106	202	208	190	201	201	190
									315006	200	209	190	200	203	188
									315906	203	208	190	199	202	187
									316806	204	211	191	203	208	188
									317706	202	210	191	203	202	187
									318606	200	211	190	199	202	188
									319506	199	208	187	199	200	186
									320406	199	208	188	198	201	185
									321306	198	210	188	200	203	185
									322206	200	207	189	198	202	185
									323106	196	209	187	197	203	183
									324006	195	210	190	197	204	186
									324906	195	207	188	195	200	182
									325806	194	210	187	192	201	184
									326706	191	206	187	193	205	184
									327606	192	209	186	192	202	187
									328506	192	210	187	190	206	184
									329406	190	208	185	189	199	181
									330306	188	205	186	188	198	183
									331206	187	205	184	186	201	182
									332106	189	205	186	189	201	184
									333006	187	205	187	188	198	181
									333906	189	209	188	190	201	183
									334806	190	207	188	188	203	186
									335706	189	208	186	188	200	183
									336606	185	207	187	186	201	182
									337506	185	208	188	185	201	183
									338406	184	208	188	187	201	184
									339306	183	206	186	185	206	183
									340206	184	204	187	183	197	184
									341106	183	208	186	184	200	183
									342006	182	208	187	182	199	185
									342906	185	209	189	183	201	183
									343806	183	206	187	183	200	185
									344706	183	209	186	181	201	185
									345606	183	207	188	182	204	184
									346506	182	204	186	183	200	183
									347406	182	207	188	182	199	184
									348306	180	206	187	183	202	185
									349206	181	205	188	181	202	185
									350106	182	207	187	182	201	186
									351006	182	207	188	180	197	185
									351906	182	209	187	180	199	185
									352806	180	206	187	181	200	184
									353706	182	208	189	180	202	186
									354606	182	206	187	180	201	185
									355506	181	210	188	182	202	183
									356406	182	206	188	179	200	184
									357306	183	208	189	181	199	185
									358206	181	205	189	181	201	185
									359106	180	206	190	182	201	185
									360006	181	207	190	180	200	185
									360906	181	203	189	180	199	184
									361806	180	207	190	181	201	183
									362707	183	205	190	180	197	186
									363607	181	206	190	183	200	187
									364507	182	206	188	180	200	187
									365407	181	204	189	179	195	185
									366307	182	205	192	181	198	188
									367207	182	202	192	182	196	188
									368107	182	206	195	181	201	187
									369007	183	206	191	180	200	188
									369907	184	206	194	180	199	189
									370807	184	206	194	184	201	190
									371707	187	207	194	184	201	191
									372607	186	205	193	182	203	188
									373507	185	207	194	184	199	192
									374407	184	205	195	184	198	191
									375307	184	206	195	181	197	190
									376207	183	205	195	186	197	190
									377107	186	208	195	186	201	191
									378007	184	205	194	183	197	193
									378907	187	205	195	184	202	194
									379807	187	204	195	184	199	192
									380707	188	207	195	187	198	193
									381607	188	203	196	186	194	191
									382507	189	205	195	185	199	192
									383407	190	205	197	186	195	192
									384307	192	205	198	187	197	193
									385207	190	205	196	186	199	194
									386107	191	206	197	185	199	191
									387007	189	201	194	190	197	190
									387907	194	203	195	188	198	192
									388807	192	204	195	188	198	192
									389707	190	202	195	189	196	191
									390607	191	203	192	186	197	189
									391507	192	203	194	190	197	190
									392407	193	203	193	190	199	191
									393307	196	203	192	189	197	189
									394207	192	204	192	188	197	190
									395107	196	203	193	190	200	188
									396007	196	204	192	191	201	190
									396907	197	205	192	192	200	192
									397807	195	201	191	191	198	186
									398707	192	202	190	192	193	188
									399607	197	205	191	192	196	187
									400507	198	204	190	193	197	187
									401407	198	204	190	193	197	186
									402307	194	205	189	190	196	185
									403207	196	204	188	191	196	183
									404107	194	202	189	192	198	187
									405007	196	203	185	193	196	187
									405907	197	203	188	193	196	186
									406807	194	204	187	192	196	185
									407707	195	206	187	196	197	184
									408607	196	201	186	195	198	186
									409507	199	205	188	191	200	185
									410407	193	202	187	194	200	185
									411307	194	202	186	190	196	184
									412207	192	203	188	190	196	184
									413107	196	204	185	192	198	185
									414008	195	205	187	194	196	184
									414908	193	205	187	190	196	183
									415808	193	205	188	189	198	185
									416708	189	203	186	189	197	185
									417608	192	203	186	191	199	185
									418508	190	204	187	189	197	182
									419408	191	202	185	188	195	183
									420308	190	205	185	190	197	184
									421208	190	205	187	188	198	183
									422108	187	202	185	188	195	182
									423008	185	203	185	184	194	181
									423908	186	204	187	186	197	181
									424808	185	202	185	185	196	182
									425708	185	204	187	185	199	184
									426608	187	202	186	185	197	182
									427508	184	201	185	181	193	183
									428408	188	205	187	184	196	184
									429308	185	202	186	183	195	181
									430208	186	204	186	183	198	184
									431108	184	203	185	184	198	184
									432008	184	204	187	182	197	183
									432908	182	204	184	184	195	179
									433808	181	203	187	184	199	184
									434708	181	200	186	182	197	184
									435608	183	204	187	181	198	182
									436508	182	201	188	181	196	184
									437408	181	204	185	179	199	180
									438308	181	203	187	181	196	183
									439208	182	203	186	181	197	182
									440108	181	201	186	179	195	182
									441008	178	201	187	178	196	182
									441908	178	201	183	177	195	183
									442808	180	202	187	177	195	182
									443708	180	203	187	181	199	184
									444608	182	205	186	181	197	183
									445508	181	203	187	180	197	183
									446408	182	206	187	180	194	186
									447308	178	200	187	177	193	187
									448208	179	200	187	175	197	183
									449108	180	202	189	179	194	186
									450008	179	200	188	178	195	186
									450908	180	201	189	180	197	185
									451808	181	200	187	180	197	184
									452708	180	198	189	179	195	185
									453608	179	204	191	179	199	185
									454508	179	202	192	178	197	186
									455408	179	201	189	178	197	185
									456308	181	199	190	179	197	185
									457208	180	198	190	177	192	186
									458108	181	201	192	180	196	187
									459008	180	199	190	177	196	187
									459908	181	200	191	179	194	187
									460808	180	200	191	176	194	187
									461708	180	198	191	182	195	187
									462608	180	198	192	178	195	189
									463508	183	199	194	181	195	187
									464408	181	199	193	178	197	191
									465308	182	200	193	175	196	188
									466208	181	197	192	178	194	190
									467108	183	203	192	180	195	190
									468008	183	200	195	181	196	190
									468908	182	202	195	180	194	189
									469808	183	202	194	180	196	190
									470708	184	198	194	181	197	192
									471608	184	199	192	182	194	192
									472508	186	199	192	183	195	189
									473408	185	201	193	180	196	191
									474308	184	200	191	184	195	187
									475208	185	199	192	184	196	189
									476109	186	199	191	183	194	188
									477009	188	197	192	185	200	189
									477909	188	204	193	186	199	191
									478809	188	199	191	181	196	188
									479709	187	203	190	183	193	189
									480609	187	199	191	183	192	187
									481509	189	199	191	183	195	190
									482409	187	197	189	183	196	188
									483309	188	199	191	186	191	186
									484209	189	201	189	186	197	187
									485109	188	200	189	185	192	186
									486009	189	202	189	188	196	190
									486909	189	198	189	187	193	187
									487809	190	200	190	189	193	185
									488709	188	199	188	185	196	184
									489609	190	200	188	185	194	188
									490509	191	200	188	185	196	187
									491409	189	199	188	187	194	187
									492309	193	199	187	186	194	186
									493209	192	199	188	188	192	186
									494109	190	200	185	186	190	185
									495009	189	199	186	188	192	185
									495909	191	200	186	187	192	185
									496809	191	201	187	186	195	185
									497709	192	198	186	189	191	183
									498609	192	202	187	188	197	184
									499509	191	196	184	188	194	184
									500409	192	201	187	191	197	184
									501309	189	201	186	190	194	183
									502209	191	197	184	187	191	184
									503109	190	201	186	189	195	184
									504009	189	200	186	187	193	182
									504909	190	200	186	186	193	180
									505809	189	197	185	187	193	181
									506709	191	199	184	188	192	184
									507609	191	200	185	186	193	184
									508509	189	202	186	188	196	183
									509409	188	198	186	187	196	182
									510309	190	200	186	188	194	184
									511209	189	200	186	188	195	183
									512109	188	197	185	184	190	182
									513009	188	200	186	187	193	184
									513909	188	199	185	186	194	184
									514809	188	199	185	184	193	184
									515709	187	201	186	183	195	184
									516609	188	201	186	187	195	184
									517509	185	200	185	184	193	183
									518409	184	199	185	184	191	183
									519309	187	196	186	184	194	183
									520209	185	198	186	183	191	183

## Sheet: Figure 3C,D
Data was generated from movie files provided on Zenodo:
figure	movie file name
3A	Fig 3A
3B	Fig 3B

## Sheet: Figure 3E
data was generated from tif stacks provided on Zenodo as follows:
data	pS						pT
	1	4	7	14	21	28	1	4	7	14	21	28
file names	Fig3B	Fig3B	Fig3B	Fig3B	Fig3B	Fig3B	Fig3A	Fig3A	Fig3A	Fig3A	Fig3A	Fig3A
	pS_sample2	pS_sample2	pS_sample2	pS_sample2	pS_sample2	pS_sample2	pT_sample2	pT_sample2	pT_sample2	pT_sample2	pT_sample2	pT_sample2
data was generated following procedure described in Methods: Image post-processing and analysis

## Sheet: Figure 3F
Time (hours)	pS-KaiC Exp	pS-KaiC Exp (err)	pT-KaiC Exp	pT-KaiC Exp (err)	Time (hours)	pS-KaiC FP	pS FP err	pT-KaiC FP	pT FP err
1	0.33	0.03	0	0.02	0	229.5	3	228.5	3
4	0.44	0.03	0.03	0.02	0.250056	220.5	3	219	2
7	0.48	0.04	0.03	0.02	0.500056	217	0	216	4
10	0.54	0.05	0.06	0.01	0.750056	218	0	215.5	3
14	0.79	0.05	0.05	0.01	1.00006	219	2	214.5	3
18	0.72	0.05	0.07	0.01	1.25006	221	4	216	4
21	0.73	0.04	0.06	0.01	1.50006	222.5	1	216	4
25	0.8	0.05	0.07	0.02	1.75008	224	0	215	2
28	1	0.1	0.07	0.02	2.00008	223.5	1	216	4
					2.25008	226	2	215.5	3
					2.50008	226.5	1	216	4
					2.75008	227.5	1	215.5	3
					3.00008	228	0	216	4
					3.25011	229	0	217	4
					3.50011	230	0	216	4
					3.75011	230.5	1	216.5	5
					4.00011	232.5	1	216.5	3
					4.25011	233	2	216	4
					4.50011	235	0	216	4
					4.75011	236	2	217	6
					5.00014	238	0	216	6
					5.25014	238	2	217.5	5
					5.50014	238	0	216.5	5
					5.75014	240	0	216	4
					6.00014	241	0	216.5	5
					6.25014	241.5	1	216	6
					6.50017	243.5	1	216	4
					6.75017	243.5	1	216.5	7
					7.00017	245.5	1	216.5	5
					7.25017	246	2	217.5	5
					7.50017	248.5	1	217	4
					7.75017	248	0	217	4
					8.00019	251	0	217.5	5
					8.25019	252.5	1	218	6
					8.50019	254.5	1	218	6
					8.75019	255.5	1	219	4
					9.00019	257.5	1	218.5	5
					9.25019	259	0	218.5	3
					9.50022	259.5	1	220.5	5
					9.75022	261.5	1	219.5	5
					10.0002	262.5	1	219.5	5
					10.2502	265	2	219	4
					10.5002	265.5	1	219.5	5
					10.7502	267	2	219.5	5
					11.0002	267.5	1	219	4
					11.2502	269.5	3	219.5	3
					11.5002	271.5	3	220.5	5
					11.7502	272.5	3	220	4
					12.0002	275	2	220	4
					12.2502	275.5	3	219.5	5
					12.5003	277	2	220	6
					12.7503	278.5	3	220	4
					13.0003	279.5	3	220.5	5
					13.2503	281	2	221	4
					13.5003	282	2	220.5	5
					13.7503	283.5	3	220	4
					14.0003	286	2	219.5	5
					14.2503	285.5	3	219.5	5
					14.5003	287	2	220	6
					14.7503	288.5	1	220.5	5
					15.0003	290.5	3	220.5	5
					15.2503	290	4	220	4
					15.5003	292.5	3	220.5	5
					15.7503	292	4	220	8
					16.0003	292	4	220.5	5
					16.2503	293	2	219.5	5
					16.5003	294	4	219.5	7
					16.7503	294.5	1	220	6
					17.0003	295.5	1	220.5	5
					17.2503	294.5	3	220	4
					17.5004	295.5	3	219.5	5
					17.7504	297	2	219	6
					18.0004	297.5	3	220	2
					18.2504	298.5	3	219.5	5
					18.5004	298	2	219	6
					18.7504	296.5	3	218	4
					19.0004	297.5	1	218.5	7
					19.2504	297.5	1	218	6
					19.5004	297.5	3	218	4
					19.7504	298	0	218	6
					20.0004	297	2	218.5	5
					20.2504	298	2	218.5	5
					20.5004	297.5	1	217.5	5
					20.7504	298	0	218	6
					21.0004	298	2	218	4
					21.2504	298.5	1	217	6
					21.5004	298.5	1	216.5	5
					21.7504	298.5	1	217.5	5
					22.0004	298.5	1	217.5	5
					22.2504	298	0	217	6
					22.5004	298	0	218	6
					22.7504	298	2	217	4
					23.0004	299	2	217.5	7
					23.2504	298	2	217	4
					23.5005	299	2	216.5	5
					23.7505	299.5	1	217.5	5
					24.0005	299	2	217.5	5
					24.2505	299	2	216.5	7
					24.5005	299.5	1	216.5	5
					24.7505	300	2	218	4
					25.0005	300	2	217	4
					25.2505	300.5	3	217	4
					25.5005	299.5	1	218	6
					25.7505	300.5	3	217	6
					26.0005	299.5	1	217.5	5
					26.2505	301	2	217	4
					26.5005	301	2	217.5	5
					26.7505	300.5	1	218.5	5
					27.0005	301	2	217.5	5
					27.2505	301	2	218.5	3
					27.5005	302	2	219.5	5
					27.7505	302.5	3	219	6
					28.0005	303	2	220	6
					28.2506	303	2	220.5	5
					28.5006	304.5	1	220.5	3
					28.7506	304	0	221	4
					29.0006	304	2	221	6
					29.2506	304	2	221	6
					29.5006	305	2	220.5	5
					29.7506	304.5	3	220.5	9
					30.0006	304	2	221	6
					30.2506	304.5	1	221.5	5
					30.5006	305.5	1	221	6
					30.7506	305.5	1	221	6
					31.0006	306	2	221	6
					31.2506	304.5	1	221	4
					31.5006	305	2	220.5	5
					31.7506	305	2	221	6
					32.0006	304.5	3	220.5	7
					32.2506	305	0	220.5	5
					32.5006	305	0	221	4
					32.7506	305.5	1	220.5	5
					33.0006	306	2	220	6
					33.2506	305	2	219.5	5
					33.5006	304.5	3	219	6
					33.7506	303.5	3	219.5	5
					34.0006	303.5	3	218	4
					34.2507	303	2	218	6
					34.5007	302.5	1	218	6
					34.7507	303.5	1	218	6
					35.0007	303	2	218.5	7
					35.2507	304.5	1	217.5	5
					35.5007	303	2	218.5	5
					35.7507	303.5	1	218	4
					36.0007	303	2	218	4
					36.2507	303.5	3	218	4
					36.5007	303.5	3	217.5	5
					36.7507	303.5	1	218	4
					37.0007	304	2	218	6
					37.2507	303.5	1	218	4
					37.5007	304	2	218	6
					37.7507	302.5	1	218.5	5
					38.0007	304	2	216.5	5
					38.2507	303.5	1	218	4
					38.5007	303.5	3	217.5	7
					38.7507	303	2	218	6
					39.0008	303	2	219	4
					39.2508	304	2	219	6
					39.5008	304.5	3	217	4
					39.7508	304.5	3	218.5	7
					40.0008	304	0	218	6
					40.2508	303.5	1	217	4
					40.5008	304.5	1	218	4
					40.7508	303.5	3	217.5	5

## Sheet: Figure 4F
	N										P
	1	1	7	7	14	14	21	21	28	28	1	1	7	7	14	14	21	21	28	28
distance	mean	SE	mean	SE	mean	SE	mean	SE	mean	SE	mean	SE	mean	SE	mean	SE	mean	SE	mean	SE
0	0	0	0	0	0	0	0	0	0	0	0	0	0	0	0	0	0	0	0	0
0.0944	0.94017	0.000368955	0.939846	0.000587834	0.939993	0.000499813	0.939008	0.000238479	0.939744	0.000201414	0.952924	0.00120052	0.974276	0.000428621	0.9752	0.00025813	0.976254	0.000149214	0.977119	9.28823e-05
0.1888	0.854132	0.000872513	0.852871	0.00148851	0.852891	0.00108244	0.850808	0.000707929	0.852746	0.000597912	0.884744	0.00286705	0.939352	0.000951012	0.941361	0.000611711	0.943762	0.000423472	0.946011	0.000220752
0.2832	0.7718	0.00126223	0.769573	0.00228181	0.769872	0.00167154	0.766604	0.000925558	0.769553	0.000953986	0.821593	0.00453696	0.911673	0.00177265	0.91597	0.000946428	0.920172	0.000572756	0.923437	0.000289788
0.3776	0.683943	0.00175863	0.680854	0.00297764	0.681538	0.00225315	0.677	0.000938561	0.680999	0.00123449	0.754736	0.00633597	0.883884	0.00242549	0.891784	0.00129863	0.898257	0.000652491	0.902379	0.000364458
0.472	0.611651	0.00217582	0.607825	0.00344628	0.60896	0.00262319	0.603455	0.000928422	0.608291	0.00137941	0.70037	0.0077715	0.86345	0.00287601	0.875604	0.00156446	0.884311	0.000638876	0.888966	0.000439685
0.5664	0.542917	0.00266377	0.538577	0.00386141	0.539781	0.00282896	0.533697	0.00114376	0.539197	0.00153322	0.647377	0.00912868	0.842383	0.00343608	0.85829	0.00184245	0.869116	0.000701818	0.874439	0.000528348
0.6608	0.47435	0.00314559	0.46958	0.00428909	0.470722	0.0029356	0.464432	0.00171171	0.470319	0.00173207	0.593606	0.0104275	0.820774	0.0040561	0.840605	0.00213177	0.853685	0.000782288	0.859772	0.000631006
0.7552	0.415026	0.0034955	0.40972	0.00462342	0.411016	0.00293847	0.404842	0.00239506	0.410787	0.00196928	0.546598	0.0114783	0.802377	0.00462443	0.826151	0.00239595	0.841473	0.000868646	0.848197	0.000728078
0.8496	0.357732	0.00408	0.352305	0.00491598	0.35327	0.00296984	0.347407	0.00302667	0.353371	0.00219776	0.499869	0.0125332	0.782794	0.00522419	0.810244	0.00264419	0.827603	0.000957169	0.83506	0.000846002
0.944	0.307099	0.00436534	0.301078	0.00515269	0.302262	0.00291964	0.296889	0.00357374	0.302718	0.00244167	0.457766	0.0133826	0.765468	0.0057714	0.796482	0.00290267	0.816077	0.00108511	0.824171	0.000919401
1.0384	0.255993	0.00485318	0.24978	0.0054176	0.25066	0.0029098	0.245885	0.00417455	0.25156	0.00269626	0.414039	0.0142009	0.746324	0.00637506	0.780908	0.00317451	0.802608	0.00116733	0.811518	0.00101129
1.1328	0.209848	0.00515351	0.20325	0.00561171	0.20411	0.00283465	0.199887	0.00471887	0.205418	0.00296853	0.37362	0.0148758	0.728557	0.00696554	0.766656	0.00345307	0.790579	0.0012778	0.800225	0.00107319
1.2272	0.169789	0.0053006	0.16279	0.00574523	0.163748	0.00271979	0.160105	0.0051605	0.165487	0.00320442	0.337387	0.0154013	0.712048	0.00752164	0.753335	0.00372764	0.779417	0.00139911	0.789711	0.0011223
1.3216	0.133582	0.00544986	0.12638	0.00585967	0.12708	0.00258317	0.124251	0.00561622	0.129225	0.00338326	0.303557	0.0158439	0.695821	0.00805811	0.740174	0.00399053	0.768175	0.00147988	0.779192	0.00117461
1.416	0.100071	0.00538213	0.0925425	0.00590075	0.0930983	0.00246176	0.0910421	0.00606068	0.0958183	0.00370131	0.270858	0.0161997	0.679603	0.00857417	0.726871	0.00430101	0.75715	0.00159461	0.768764	0.00121327
1.5104	0.0691727	0.00532361	0.0613993	0.00595412	0.0615928	0.00227073	0.0605624	0.006475	0.0648104	0.00393633	0.239486	0.0164528	0.663012	0.00910491	0.713346	0.00458546	0.745662	0.0016958	0.757947	0.00126851
1.6048	0.0433495	0.00516822	0.0354372	0.00592439	0.0352887	0.00205158	0.0351323	0.00686824	0.038979	0.00429687	0.211392	0.0165951	0.647477	0.00957949	0.700629	0.0048549	0.735124	0.00182122	0.747954	0.00131991
1.6992	0.0221085	0.00509641	0.0141227	0.00587409	0.0136974	0.00181219	0.0143298	0.00718493	0.0176147	0.00454827	0.186504	0.0166606	0.632621	0.0100248	0.688439	0.00509777	0.724907	0.00194197	0.738305	0.00138697
1.7936	0.00477729	0.00511428	-0.00308277	0.00575522	-0.00397518	0.00159976	-0.00238929	0.00749488	0.000162706	0.00477945	0.163852	0.0165052	0.617693	0.0104237	0.67604	0.00534393	0.714511	0.00205173	0.728501	0.00146574
1.888	-0.00693968	0.00514842	-0.0148594	0.00554617	-0.0159063	0.0014538	-0.0134977	0.0077068	-0.0115323	0.00519268	0.14426	0.0162749	0.603337	0.0107649	0.66408	0.00557852	0.704747	0.00218592	0.719151	0.00153243
1.9824	-0.0113365	0.00555237	-0.0190858	0.00517258	-0.0203738	0.00107291	-0.0169405	0.00778479	-0.0159925	0.00522712	0.129704	0.0157313	0.589467	0.011089	0.652521	0.00581308	0.694848	0.00229938	0.709919	0.00161483
2.0768	-0.0081244	0.0057758	-0.0157334	0.00465813	-0.017262	0.00121237	-0.0127375	0.00781001	-0.0125066	0.00566184	0.118706	0.0150589	0.575716	0.0112694	0.640774	0.00608624	0.685299	0.00243108	0.70068	0.00166535
2.1712	-0.00288714	0.00629462	-0.0104368	0.0040941	-0.0122022	0.00135394	-0.00645898	0.00770994	-0.00728087	0.00566351	0.110214	0.0142439	0.562353	0.0114763	0.629524	0.00634415	0.675727	0.0025626	0.691701	0.00171661
2.2656	0.00142981	0.00670748	-0.0060804	0.00350512	-0.00832295	0.00174555	-0.00140157	0.00755133	-0.00287781	0.00573497	0.101504	0.0134926	0.548864	0.0116241	0.61805	0.00663226	0.666164	0.00270549	0.682579	0.00177381
2.36	0.00439603	0.00712095	-0.00312433	0.0030717	-0.00553	0.00202724	0.00223075	0.00720984	1.15848e-05	0.00579019	0.0925622	0.0128883	0.535362	0.0117832	0.606693	0.00688813	0.656663	0.00285946	0.67355	0.00180928
2.4544	0.00618908	0.00733517	-0.00130895	0.00269223	-0.00394047	0.00220392	0.00447838	0.00675261	0.00169235	0.00587244	0.0842471	0.0124552	0.522906	0.0118819	0.596158	0.00711484	0.64799	0.00301023	0.66522	0.00182794
2.5488	0.00717247	0.00744563	-0.000260068	0.00222448	-0.00327545	0.0023136	0.00572716	0.00620317	0.0025411	0.00586311	0.0763169	0.0120535	0.510728	0.0119716	0.585805	0.00733357	0.639513	0.00316566	0.657042	0.00185189
2.6432	0.0071435	0.00779954	-0.000294604	0.00180506	-0.00339121	0.00232419	0.00596841	0.00562186	0.00236355	0.0054789	0.0687311	0.0114125	0.497644	0.0121618	0.574749	0.00757783	0.63003	0.00332945	0.648091	0.00199129
2.7376	0.00728713	0.00754514	-5.48798e-05	0.00143946	-0.00356185	0.00252102	0.00614694	0.00491858	0.00218382	0.00559587	0.0605764	0.0113761	0.484945	0.012144	0.563891	0.00776719	0.621483	0.00350805	0.639502	0.0019491
2.832	0.00641396	0.00772298	-0.000920578	0.00136968	-0.00409423	0.00248992	0.00566661	0.00448171	0.00130761	0.00515058	0.0542046	0.0107798	0.472455	0.0123241	0.553405	0.00795592	0.612464	0.00368379	0.630906	0.00207928
2.9264	0.00589787	0.00748486	-0.00132438	0.00132679	-0.00468401	0.00272465	0.00539232	0.00390489	0.00065682	0.00498668	0.0482443	0.0106059	0.461075	0.0123365	0.543718	0.00812381	0.604604	0.00386239	0.623057	0.00208993
3.0208	0.00533932	0.00745576	-0.00175461	0.00133896	-0.00564188	0.00294873	0.00496353	0.0032468	0.000102053	0.00450363	0.043256	0.0101947	0.449425	0.0124158	0.533755	0.0083372	0.59629	0.00405996	0.614851	0.00218399
3.1152	0.00424726	0.00728072	-0.0023054	0.0017164	-0.0057627	0.00285246	0.00449411	0.00284687	-0.000421332	0.00411624	0.0392127	0.00967591	0.437735	0.0125444	0.523818	0.00852532	0.587741	0.00424104	0.606587	0.00232197
3.2096	0.00417006	0.00668089	-0.00190015	0.0020891	-0.00612155	0.00327248	0.00443416	0.00220362	-0.000648564	0.00389698	0.0353245	0.00964391	0.426807	0.0124636	0.514349	0.00867311	0.580257	0.00444436	0.598815	0.00225588
3.304	0.00342292	0.00645586	-0.00219474	0.00245184	-0.00601424	0.00310027	0.00432635	0.0018308	-0.000726391	0.00343171	0.0327308	0.00906699	0.415774	0.0126354	0.504862	0.00885872	0.572045	0.00463155	0.590862	0.00238241
3.3984	0.00334987	0.00589512	-0.00183324	0.00294081	-0.00618946	0.00333085	0.00443241	0.00133065	-0.000831801	0.00326	0.0300536	0.00890879	0.405349	0.012637	0.495764	0.0089818	0.564707	0.00483674	0.583297	0.00232849
3.4928	0.00312746	0.00537334	-0.00159674	0.00347214	-0.00625795	0.00338122	0.00442484	0.000988898	-0.000911717	0.0031641	0.0277637	0.00861376	0.394579	0.0127042	0.486356	0.00910957	0.556929	0.00503765	0.575399	0.00232336
3.5872	0.00253102	0.00492517	-0.0017961	0.00375193	-0.00599259	0.00313199	0.00463125	0.000702646	-0.00107064	0.00306054	0.0260319	0.0082312	0.384005	0.0128971	0.477157	0.00927098	0.549012	0.00522241	0.567644	0.00242604
3.6816	0.00253726	0.00434702	-0.00143164	0.00420877	-0.00596076	0.00322087	0.00479744	0.000642588	-0.00139434	0.00326668	0.0240815	0.00831176	0.374407	0.0128803	0.468721	0.00934841	0.542313	0.00544546	0.56057	0.00230884
3.776	0.00203999	0.00399255	-0.00156569	0.0044421	-0.00594165	0.00313484	0.00446745	0.00039492	-0.00158524	0.00315917	0.0228571	0.00789758	0.364275	0.0131756	0.459804	0.00957421	0.534548	0.00560471	0.552896	0.00244663
3.8704	0.00191587	0.00365632	-0.00135415	0.00463667	-0.00566109	0.00314551	0.00453369	0.000492811	-0.00209257	0.00340438	0.0212925	0.00801787	0.354816	0.0132169	0.451439	0.0096928	0.527825	0.00582234	0.545786	0.00236322
3.9648	0.00141527	0.00345223	-0.00150526	0.00470507	-0.00549418	0.00305897	0.00431029	0.000605099	-0.00240185	0.00342399	0.0203571	0.00779049	0.345318	0.0135074	0.442952	0.00991885	0.520541	0.00594435	0.538435	0.00248957
4.0592	0.00125302	0.00349238	-0.00138487	0.00471166	-0.00503705	0.0029839	0.0044245	0.000867284	-0.00285327	0.00360481	0.0190987	0.00803943	0.33648	0.0135408	0.434959	0.0100265	0.514133	0.00611706	0.531651	0.00242048
4.1536	0.00116154	0.00370631	-0.00134724	0.00468042	-0.004614	0.00288753	0.00436696	0.001167	-0.00321007	0.00368404	0.0180185	0.00829652	0.328325	0.0135715	0.427469	0.0101098	0.508087	0.00626237	0.525315	0.00236384
4.248	0.000740323	0.00399097	-0.0015331	0.00461482	-0.00454492	0.00281579	0.00361398	0.00171559	-0.00340928	0.00359912	0.0176806	0.00798887	0.319674	0.0140373	0.419356	0.0103495	0.500962	0.00623843	0.518274	0.00261836
4.3424	0.00090825	0.00436231	-0.00132513	0.00444722	-0.00380744	0.00258615	0.003801	0.00209065	-0.00378266	0.00362298	0.0163765	0.00862531	0.311498	0.0138209	0.411661	0.0103206	0.495046	0.00646728	0.511896	0.00238628
4.4368	0.000655913	0.00462656	-0.00118441	0.00427551	-0.00372422	0.00247434	0.00343031	0.00259869	-0.00395117	0.0034945	0.0160173	0.0085564	0.303536	0.01407	0.404003	0.0104667	0.48862	0.0064904	0.505354	0.00249521
4.5312	0.000569433	0.00503098	-0.000911241	0.00402557	-0.00315145	0.00237639	0.00322965	0.00302034	-0.00422094	0.00335587	0.0153148	0.00867714	0.29609	0.0140792	0.396877	0.0104836	0.482734	0.00660732	0.499327	0.00242469
4.6256	0.000375118	0.0053866	-0.000348919	0.0037255	-0.00260689	0.00240215	0.0025497	0.00324707	-0.00458462	0.00335478	0.0146078	0.00878321	0.288955	0.0141284	0.389906	0.0105023	0.47689	0.00668999	0.49345	0.00236353
4.72	-0.000124121	0.00535792	-9.77991e-05	0.00341718	-0.00300008	0.00234563	0.00242933	0.00357528	-0.00458635	0.00314687	0.0148892	0.00837767	0.281752	0.0144963	0.382772	0.0106864	0.470787	0.00658636	0.487335	0.00253153
4.8144	-0.000192356	0.00553859	0.000476467	0.00304673	-0.00212989	0.0024435	0.00222793	0.00397422	-0.00518267	0.00305948	0.0138319	0.00870292	0.274887	0.0142282	0.376003	0.0105737	0.465192	0.00677474	0.481658	0.00226488
4.9088	-0.000754662	0.00537759	0.000724406	0.0027778	-0.00262202	0.00253641	0.0022432	0.00416607	-0.00517019	0.00293454	0.0139939	0.00830789	0.268351	0.0145092	0.369437	0.0106767	0.459593	0.00667134	0.475986	0.00237901
5.0032	-0.00100755	0.00557709	0.00161877	0.00243475	-0.00152718	0.00287989	0.00118762	0.00415092	-0.00581744	0.00312671	0.012847	0.00857153	0.261801	0.0143697	0.362764	0.0105591	0.453811	0.00679426	0.470223	0.00218508
5.0976	-0.00142321	0.00530101	0.00186024	0.00241764	-0.00168352	0.00301894	0.00127734	0.004345	-0.00584589	0.00291918	0.0125863	0.00829965	0.255439	0.0143839	0.356327	0.0105578	0.448279	0.00677612	0.464593	0.00215534
5.192	-0.00194832	0.00512127	0.00240882	0.00241794	-0.00160057	0.00317179	0.000869512	0.00406586	-0.00589007	0.00290319	0.0123726	0.00797328	0.249341	0.014549	0.350091	0.0105875	0.442778	0.00672611	0.459047	0.00218028
5.2864	-0.00203636	0.00481395	0.00297549	0.00272355	-0.00106206	0.00344658	0.000576722	0.0042391	-0.00616007	0.00269657	0.0111229	0.00796809	0.243456	0.0141518	0.344122	0.0104514	0.437469	0.00687097	0.453676	0.0019542
5.3808	-0.00285083	0.00436741	0.0033909	0.00277495	-0.00152302	0.00356377	0.000700971	0.00353425	-0.00573285	0.00259212	0.0116666	0.00727566	0.237806	0.0146823	0.338275	0.0105935	0.432321	0.00668937	0.448453	0.00215862
5.4752	-0.00275098	0.00408923	0.00418981	0.00325644	-0.000636879	0.00369875	7.60271e-05	0.00328797	-0.00600912	0.00254587	0.0104078	0.00724745	0.232241	0.0144326	0.332457	0.0105263	0.426968	0.00676132	0.443154	0.00198814
5.5696	-0.0030936	0.00343304	0.00428082	0.00345881	-0.000883377	0.0039905	0.00062439	0.00298679	-0.00582899	0.00212482	0.00988815	0.00687172	0.226915	0.014406	0.326954	0.0105571	0.422063	0.00676314	0.43812	0.00196452
5.664	-0.00330394	0.002926	0.00463865	0.00371665	-0.000809658	0.00398401	0.000577727	0.00252425	-0.00558188	0.00183007	0.00943695	0.00654436	0.221833	0.0145706	0.321557	0.0106509	0.417102	0.00669591	0.433184	0.00199037
5.7584	-0.00310714	0.00242962	0.00467827	0.00407482	-0.000687852	0.00425357	0.000598157	0.00230048	-0.00559132	0.00145811	0.00803603	0.00646879	0.216815	0.0142253	0.316279	0.0106141	0.412182	0.00679256	0.42822	0.00181166
5.8528	-0.003813	0.00186799	0.00487258	0.00422568	-0.000977654	0.00408329	0.000998253	0.00160483	-0.00491731	0.00125124	0.00868173	0.00592643	0.212047	0.01508	0.311009	0.0108754	0.407445	0.00655596	0.423582	0.00208849
5.9472	-0.00330123	0.00158456	0.0047635	0.00467648	-0.000996884	0.00439099	0.000940327	0.00142016	-0.00497659	0.000889885	0.00702213	0.0059806	0.207134	0.0146732	0.305811	0.0108297	0.402476	0.00667468	0.418625	0.00187778
6.0416	-0.00365401	0.00101829	0.00429301	0.00468332	-0.00108331	0.00444953	0.00153708	0.00105622	-0.0044487	0.000727717	0.00712451	0.00564727	0.202743	0.0152106	0.300952	0.0110081	0.39812	0.00657902	0.414197	0.00207247
6.136	-0.0031505	0.00161181	0.00434783	0.00519906	-0.0011791	0.00473457	0.00148195	0.000765658	-0.00445389	0.000528922	0.00557722	0.00569742	0.198164	0.0149962	0.296051	0.011	0.393338	0.00662642	0.409511	0.00194725
6.2304	-0.00308604	0.00182752	0.00405083	0.00547339	-0.00132525	0.00464378	0.00186109	0.000447827	-0.00398758	0.000527521	0.00534603	0.00549277	0.193836	0.0154334	0.29125	0.01117	0.388806	0.00654572	0.405092	0.00211597
6.3248	-0.00294467	0.00209101	0.00322785	0.00559655	-0.00112606	0.00474817	0.002381	0.00035785	-0.0037154	0.000668715	0.00492205	0.00529111	0.189633	0.0157577	0.286642	0.0113189	0.384489	0.00652992	0.400684	0.00226433
6.4192	-0.00224476	0.00283208	0.00299274	0.00596375	-0.00124049	0.00497503	0.00272739	0.000436022	-0.0035175	0.00067692	0.00380619	0.00524759	0.185389	0.0157171	0.282069	0.0113743	0.379918	0.00652881	0.396236	0.00224636
6.5136	-0.00210061	0.00289205	0.0022485	0.00616195	-0.000797697	0.00476933	0.00323765	0.000661116	-0.00315249	0.000890829	0.00404445	0.0050959	0.181622	0.0164553	0.2777	0.0116104	0.375786	0.00640217	0.392153	0.00258415
6.608	-0.00114493	0.00366676	0.00188425	0.006384	-0.000946513	0.00501085	0.0034105	0.000872939	-0.00290103	0.00108339	0.00296007	0.00499366	0.177568	0.0162698	0.273311	0.0116548	0.371283	0.00642653	0.387742	0.00253224
6.7024	-0.000648877	0.00384142	0.00143013	0.00651403	-0.000521862	0.0048367	0.00379099	0.00116829	-0.0025818	0.00123853	0.00295213	0.0048556	0.173915	0.0169021	0.269	0.0118831	0.367077	0.00628143	0.383711	0.00283637
6.7968	2.47537e-06	0.00433829	0.000729294	0.00664642	-0.000355967	0.004933	0.00392728	0.00136636	-0.00252684	0.00150652	0.00244171	0.00468244	0.170111	0.016949	0.264815	0.0119773	0.362822	0.00627947	0.379432	0.00286405
6.8912	0.000631371	0.00488659	0.000210129	0.00659405	-0.000377776	0.00507138	0.0040075	0.00151402	-0.00236198	0.00184545	0.00204298	0.00453392	0.166478	0.017025	0.260729	0.0120954	0.358582	0.00625028	0.37528	0.00290108
6.9856	0.000983999	0.00489128	-0.00011584	0.00671164	5.32257e-05	0.00495605	0.00408251	0.0017303	-0.0024509	0.00182619	0.00279119	0.00450169	0.16335	0.0180003	0.256654	0.0124181	0.354657	0.00604101	0.371663	0.0033594
7.08	0.00142792	0.0055821	-0.000840952	0.00649474	-0.000306418	0.00526179	0.00390407	0.0017032	-0.0024683	0.00230126	0.00207496	0.00436641	0.159583	0.0176321	0.252681	0.012434	0.350247	0.00609355	0.367212	0.00316825
7.1744	0.00168639	0.00552929	-0.00124801	0.00639805	-0.000135652	0.00525998	0.00380866	0.00184161	-0.00275892	0.0022258	0.00254881	0.0044316	0.156488	0.0183018	0.248749	0.0126808	0.346303	0.00592236	0.363571	0.00346334
7.2688	0.00202704	0.00571051	-0.00186767	0.00608084	-0.000336621	0.00533263	0.00358044	0.00183734	-0.00307686	0.00247515	0.00221342	0.00436383	0.153033	0.0181113	0.244957	0.0127223	0.34205	0.00591027	0.359391	0.0033342
7.3632	0.00200096	0.00581378	-0.00220377	0.00569443	-0.000656078	0.00546309	0.00299852	0.00180211	-0.00308001	0.00274907	0.00222852	0.00440944	0.149831	0.0183091	0.241131	0.0128661	0.337819	0.00583978	0.355293	0.00339318
7.4576	0.002223	0.005621	-0.00233697	0.00554569	-0.000648798	0.00546669	0.00250408	0.00195794	-0.00349333	0.00257689	0.00282679	0.00458976	0.147028	0.0190321	0.237214	0.0131569	0.33389	0.00569009	0.351662	0.0037207
7.552	0.00212546	0.00564596	-0.00246436	0.00514752	-0.000880501	0.00552302	0.00223093	0.00198538	-0.0036043	0.00305248	0.00253284	0.00474445	0.143772	0.0187163	0.233508	0.0131935	0.329572	0.0057276	0.347237	0.0035593
7.6464	0.00249425	0.00539192	-0.00237747	0.00491382	-0.000958671	0.00546336	0.00175055	0.00217859	-0.0040071	0.00283798	0.00297489	0.00500572	0.141377	0.0194295	0.229832	0.0135457	0.325914	0.00560456	0.343911	0.00388931
7.7408	0.00244264	0.00521609	-0.00234432	0.00453764	-0.00116407	0.00540865	0.00139162	0.00223512	-0.00429235	0.00314801	0.00274663	0.00523757	0.138446	0.0192001	0.226355	0.0136281	0.321756	0.00563095	0.339716	0.00373073
7.8352	0.002419	0.00499691	-0.002229	0.00411138	-0.00138664	0.00546773	0.000691588	0.00229489	-0.00426794	0.00322962	0.00294167	0.00557682	0.135954	0.0196935	0.222683	0.0139571	0.317722	0.00555658	0.335878	0.00393588
7.9296	0.00251579	0.00472866	-0.00219936	0.00387409	-0.00158399	0.00534228	0.000265729	0.00250028	-0.00472115	0.00322544	0.00289245	0.00592068	0.133383	0.0198998	0.219056	0.0141932	0.313719	0.0055233	0.33197	0.00398597
8.024	0.00211536	0.0042928	-0.00215493	0.00361915	-0.00178367	0.0052716	-0.000175775	0.00261131	-0.00473421	0.00345829	0.0026207	0.00620092	0.130569	0.0196497	0.215708	0.014303	0.309558	0.00553067	0.327642	0.00379385
8.1184	0.00245622	0.00401729	-0.00210002	0.00356204	-0.00221321	0.00519174	-0.000778474	0.0028358	-0.00518472	0.00320371	0.00268104	0.0064361	0.128549	0.0202849	0.212172	0.0146988	0.305957	0.00544624	0.324336	0.00407558
8.2128	0.00178665	0.00356362	-0.00200925	0.00323804	-0.00230601	0.00510227	-0.00106703	0.00290827	-0.00494897	0.00340312	0.0025635	0.00672804	0.125722	0.0200814	0.208753	0.0148292	0.301502	0.00544057	0.319728	0.00388011
8.3072	0.00178721	0.0031745	-0.0018966	0.00323681	-0.00279267	0.00508129	-0.00154314	0.0031076	-0.00523906	0.00339926	0.00253269	0.00704334	0.12384	0.0206473	0.205289	0.0152637	0.298078	0.00535959	0.316519	0.00417396
8.4016	0.00126994	0.00274358	-0.00175004	0.00312479	-0.00285158	0.00490955	-0.00168431	0.00320406	-0.00501419	0.00333677	0.00230466	0.00732303	0.12126	0.0205296	0.201946	0.0154246	0.29377	0.00533192	0.312072	0.00398628
8.496	0.00108821	0.00224262	-0.00154926	0.00320375	-0.00291573	0.00473142	-0.00187908	0.00332928	-0.00486356	0.00314043	0.00193423	0.00746438	0.118695	0.0203673	0.19865	0.0155544	0.28943	0.00529886	0.307566	0.00371495
8.5904	0.000939603	0.0018251	-0.00108096	0.0032304	-0.00370885	0.00474192	-0.00178185	0.00335692	-0.00491308	0.00337411	0.00215737	0.00776341	0.1173	0.0211546	0.195146	0.01612	0.286283	0.00525791	0.304929	0.00421105
8.6848	0.00035323	0.00140855	-0.000992699	0.00322853	-0.00334785	0.00444775	-0.00179482	0.0032472	-0.00448612	0.0031393	0.00159509	0.00776189	0.114315	0.0206114	0.191918	0.0160814	0.281427	0.0052356	0.299602	0.00367725
8.7792	0.00058195	0.00106682	-0.000449405	0.00326775	-0.00411212	0.00443814	-0.00182146	0.00325188	-0.0043936	0.00331029	0.00152331	0.00791055	0.112943	0.0211643	0.188602	0.0165899	0.27831	0.00519711	0.296938	0.00405469
8.8736	0.000502506	0.00106982	-0.000398928	0.0033414	-0.00381897	0.00414468	-0.00165551	0.00319329	-0.00388346	0.00306065	0.00113198	0.00786197	0.11037	0.0208539	0.185464	0.0166426	0.273732	0.0051562	0.292011	0.0036993
8.968	0.000285107	0.00121054	-8.02157e-05	0.00319806	-0.00389936	0.00404744	-0.00138021	0.00306283	-0.00377036	0.00318612	0.000812934	0.00784177	0.108543	0.0209851	0.182356	0.0169223	0.270074	0.00514499	0.288284	0.0037517
9.0624	0.00029244	0.00133814	0.000139571	0.00315458	-0.00418311	0.00399928	-0.00102985	0.00301952	-0.00345653	0.00328912	0.00053219	0.00786734	0.10687	0.0212031	0.1791	0.0172774	0.266386	0.00512053	0.284608	0.00388846
9.1568	0.000311885	0.0016798	-0.000186811	0.00304199	-0.00342254	0.00383872	-0.000625811	0.00291476	-0.00322134	0.00308462	-7.24242e-05	0.00769706	0.104399	0.0208738	0.175988	0.0172713	0.261669	0.00509661	0.279399	0.00356068
9.2512	0.000469085	0.00188779	0.00052013	0.00281136	-0.00412428	0.00388093	-0.000199577	0.00294106	-0.0028919	0.00338556	-0.000137709	0.00747021	0.103207	0.0212082	0.172962	0.0177532	0.258779	0.0050786	0.276773	0.00390251
9.3456	0.000361049	0.00203982	-0.000150675	0.00258073	-0.00349064	0.0037595	0.000260723	0.00278678	-0.00293069	0.00320862	-0.000614044	0.00727338	0.101143	0.0209718	0.170014	0.0177995	0.254426	0.00505552	0.271959	0.00366993
9.44	0.000189078	0.00214257	-0.000209559	0.00239048	-0.00369169	0.00369267	0.00085391	0.00278425	-0.00278387	0.00335686	-0.000954944	0.00702072	0.0994681	0.0209927	0.166989	0.0180831	0.250802	0.00503988	0.26816	0.00375414
9.5344	0.000295904	0.00220652	-0.000499367	0.00200061	-0.00361694	0.00370536	0.00120887	0.00260748	-0.00280384	0.00322446	-0.00123099	0.00674626	0.0979104	0.0209235	0.16409	0.0182798	0.24707	0.00500655	0.264412	0.00374004
9.6288	0.000218306	0.00215457	-0.0015235	0.00182548	-0.00279311	0.00357853	0.00178689	0.00227376	-0.00267911	0.00325573	-0.00194926	0.00647498	0.0956347	0.0205089	0.161138	0.0181861	0.242273	0.00497092	0.259099	0.00347098
9.7232	0.000271039	0.00217286	-0.000966377	0.00153398	-0.00351714	0.00373596	0.00208068	0.00231763	-0.0023616	0.0031367	-0.00171554	0.00620878	0.0946588	0.0207569	0.15829	0.0186821	0.239653	0.00492839	0.256871	0.00379685
9.8176	0.000238045	0.00209425	-0.00227055	0.00127703	-0.00279759	0.00348678	0.00279195	0.00195599	-0.00287268	0.00315018	-0.00242598	0.00591565	0.0926317	0.0204022	0.155296	0.018636	0.234999	0.00488485	0.251647	0.00357058
9.912	0.000318552	0.00204985	-0.00215611	0.00110029	-0.00274407	0.00355124	0.00295946	0.00187678	-0.00258651	0.00295629	-0.00236254	0.00568495	0.0912121	0.0203651	0.152443	0.0188837	0.231614	0.00483559	0.248337	0.00365983
10.0064	0.000149295	0.00193987	-0.00261201	0.000823787	-0.0020354	0.00368291	0.00323627	0.00176632	-0.00273927	0.0027009	-0.00255467	0.00545273	0.0895078	0.0201157	0.149599	0.0188561	0.227513	0.004789	0.244047	0.00355327
10.1008	9.68735e-05	0.00186354	-0.00324094	0.000536444	-0.00171223	0.00348249	0.0035181	0.00178794	-0.00289509	0.00265081	-0.00286807	0.00527029	0.0879487	0.0199064	0.146803	0.0189355	0.223653	0.00476907	0.239883	0.00349873
10.1952	-0.000114325	0.00177559	-0.00340064	0.000469918	-0.00158824	0.00341719	0.00356198	0.0019192	-0.00258247	0.00248927	-0.00285419	0.00510226	0.0866447	0.0198353	0.144048	0.0191978	0.220285	0.00474189	0.236503	0.00358309
10.2896	-0.000175575	0.00180891	-0.00392831	0.000417161	-0.00108819	0.0032312	0.00371284	0.0020797	-0.00315385	0.0024359	-0.00317071	0.00481679	0.0849874	0.0195665	0.141215	0.019171	0.216113	0.00473587	0.231924	0.00345065
10.384	-0.000772434	0.00156753	-0.00364434	0.000813858	-0.000644946	0.00329996	0.00349174	0.00216991	-0.00262213	0.00224377	-0.00290654	0.00467915	0.0836267	0.0194599	0.138547	0.0193581	0.212785	0.00471383	0.228748	0.00350341
10.4784	-0.00104207	0.00145024	-0.00413248	0.00106449	-5.46336e-06	0.00315004	0.00366127	0.00229871	-0.00321508	0.00220369	-0.00330227	0.00447346	0.0819951	0.019169	0.135837	0.0192737	0.208602	0.00471304	0.224151	0.00337405
10.5728	-0.00109136	0.00135215	-0.00407091	0.00134306	0.000249355	0.00281288	0.00353737	0.00240424	-0.00311392	0.00215524	-0.00323387	0.00426147	0.0805414	0.0189964	0.133217	0.0194177	0.204981	0.00469829	0.220387	0.00337966
10.6672	-0.00127534	0.00115322	-0.00399893	0.00158896	0.000580876	0.00268301	0.00345621	0.00246045	-0.00327882	0.00208113	-0.00327214	0.00406423	0.0791697	0.018812	0.130632	0.0195453	0.201442	0.00469546	0.216668	0.00337686
10.7616	-0.00161087	0.000885529	-0.00411085	0.00177064	0.0012202	0.00259511	0.0034181	0.00261389	-0.00344007	0.00199073	-0.0035148	0.00396621	0.0775909	0.0185399	0.128036	0.0194651	0.197385	0.00468842	0.212333	0.00328714
10.856	-0.00189068	0.000622295	-0.00364299	0.00190915	0.00123089	0.0023622	0.0031753	0.00260262	-0.00295578	0.00176667	-0.00329175	0.00373568	0.0762974	0.0184149	0.125519	0.0196955	0.194177	0.00466801	0.20921	0.00335911
10.9504	-0.00192313	0.000593207	-0.00361339	0.00200842	0.00189103	0.00234906	0.0030151	0.00277018	-0.00351111	0.0018058	-0.00357769	0.0036782	0.0747708	0.0181102	0.122909	0.0195776	0.19022	0.00465052	0.204877	0.00323577
11.0448	-0.0016558	0.000835646	-0.00306773	0.00203599	0.00190558	0.00200872	0.00271948	0.00269317	-0.00328329	0.00157616	-0.00361876	0.00341971	0.0733442	0.0178876	0.120384	0.0197502	0.186708	0.0046135	0.201229	0.00326116
11.1392	-0.00185863	0.0009263	-0.00285355	0.00188419	0.00243464	0.00200904	0.0025591	0.00274585	-0.00331531	0.0016126	-0.00380264	0.00336916	0.0717877	0.0175771	0.117814	0.0195966	0.182764	0.00458216	0.196997	0.00316387
11.2336	-0.0019565	0.00113357	-0.00253721	0.00172516	0.00286663	0.00195628	0.0023504	0.00275154	-0.00325071	0.00172909	-0.00389078	0.00336356	0.07038	0.0172895	0.115319	0.0195474	0.179217	0.00455133	0.193272	0.00310865
11.328	-0.00209582	0.00153383	-0.00176988	0.00162857	0.00251924	0.00183469	0.00227668	0.00260518	-0.00261994	0.00160541	-0.00358452	0.00311858	0.0690807	0.0170222	0.112929	0.019748	0.176279	0.00450921	0.190408	0.00318588
11.4224	-0.00173449	0.00176455	-0.00166604	0.00133419	0.00331048	0.00155099	0.00182754	0.00256201	-0.00294385	0.00184976	-0.0040127	0.00321668	0.0674941	0.0166152	0.110374	0.0195524	0.172015	0.00449186	0.185593	0.00305199
11.5168	-0.00196405	0.00212336	-0.00107354	0.00131565	0.0032446	0.0016679	0.00184244	0.00238236	-0.00231676	0.00192866	-0.00380488	0.00309549	0.0661201	0.0162684	0.10797	0.0196326	0.168915	0.00446499	0.182501	0.00306621
11.6112	-0.00200986	0.00233082	-0.000899907	0.00128617	0.00341308	0.00162129	0.00166803	0.00224829	-0.00224575	0.00217003	-0.00387511	0.00314484	0.0646114	0.0159499	0.105485	0.0193625	0.165174	0.00445099	0.178472	0.00297332
11.7056	-0.00200184	0.00250424	-0.000625257	0.00152364	0.00360586	0.00168202	0.00156712	0.00213559	-0.00202129	0.00241162	-0.00394121	0.00320728	0.0632258	0.0155986	0.103211	0.0192364	0.161845	0.00443557	0.174935	0.00291707
11.8	-0.00184407	0.00273099	-0.000295181	0.00173891	0.00337002	0.00154924	0.00136641	0.00215144	-0.00167355	0.0024871	-0.00407063	0.00297919	0.0618663	0.0151529	0.100934	0.019265	0.158508	0.00438635	0.171347	0.00291843
11.8944	-0.00180326	0.00272867	-0.000391065	0.00209887	0.0038235	0.00166258	0.00109503	0.00197752	-0.00156719	0.00279806	-0.00423382	0.00315363	0.0604772	0.0147987	0.0986285	0.0190317	0.154752	0.00436812	0.167228	0.00283335
11.9888	-0.00181687	0.00284956	-0.000241983	0.00244276	0.00329028	0.00177724	0.00122356	0.00208931	-0.00123938	0.00289655	-0.00408678	0.00300256	0.0590625	0.0143581	0.0962746	0.0189646	0.151649	0.00431062	0.164123	0.00284044
12.0832	-0.00181682	0.00300089	-0.000392968	0.00261238	0.00341881	0.00180231	0.00104054	0.00194465	-0.00111268	0.00330975	-0.00422983	0.00304498	0.0576249	0.0141626	0.0938869	0.018597	0.147796	0.00427789	0.15986	0.00277679
12.1776	-0.00178992	0.00290113	-0.00025283	0.00295087	0.00326668	0.00176674	0.000992943	0.0022004	-0.000870697	0.00326119	-0.00428674	0.00309274	0.0562766	0.0135402	0.0916085	0.0185817	0.144591	0.00423353	0.15653	0.00278009
12.272	-0.00184541	0.00300247	-0.000192641	0.003035	0.00320197	0.00174625	0.000957587	0.00214533	-0.000680272	0.00338963	-0.00424168	0.00314119	0.0548895	0.0131837	0.0892838	0.0183696	0.141067	0.00419466	0.152724	0.00276355
12.3664	-0.00201552	0.00300842	-0.000148424	0.00322838	0.00316988	0.00180267	0.000913856	0.00206974	-0.000660711	0.00348742	-0.00419194	0.00329836	0.0535185	0.0128938	0.0870126	0.0180555	0.137605	0.00417609	0.148988	0.00272086
12.4608	-0.00208662	0.00306385	-3.66648e-05	0.00322775	0.00264488	0.00184149	0.00111426	0.00228806	-0.000779284	0.00336512	-0.00426616	0.00326153	0.0520414	0.0122737	0.0846372	0.0179149	0.134615	0.00411987	0.146009	0.00272343
12.5552	-0.00210583	0.00328455	0.000215432	0.00316164	0.00242238	0.00195843	0.00111089	0.00195941	-0.000619836	0.0033851	-0.00399717	0.00315846	0.0506243	0.0121471	0.0824092	0.0176189	0.130707	0.00404619	0.141636	0.00267901
12.6496	-0.00225101	0.00336568	0.000316619	0.0030272	0.00231606	0.00200262	0.00127085	0.00213545	-0.000649705	0.00336516	-0.00438095	0.00334381	0.0490932	0.011469	0.0799538	0.0174482	0.127433	0.0040066	0.138262	0.00267557
12.744	-0.00248533	0.00355615	0.000307764	0.0029447	0.00172266	0.00213801	0.00144885	0.0017977	-0.00110747	0.00335751	-0.0042711	0.00342441	0.0476053	0.0112856	0.0775617	0.0170103	0.123974	0.00396797	0.134502	0.0026194
12.8384	-0.0025587	0.00367495	0.00036604	0.00284024	0.00129623	0.00219794	0.00163147	0.00163643	-0.00135207	0.00329579	-0.00432752	0.00348883	0.0460936	0.0109137	0.0752342	0.0167078	0.120512	0.00391705	0.130783	0.00258096
12.9328	-0.00273688	0.00378514	0.000256105	0.00262507	0.000685034	0.00234152	0.00183953	0.00149164	-0.0020179	0.00324808	-0.00459264	0.00364562	0.0444478	0.0104472	0.0727368	0.0163011	0.117202	0.00386956	0.127307	0.00252153
13.0272	-0.00259229	0.00395351	0.000495211	0.00240419	0.000455714	0.00244339	0.00197453	0.00129163	-0.00175666	0.00320064	-0.00454511	0.00367695	0.0430048	0.0101453	0.0704659	0.016125	0.113457	0.00379804	0.123169	0.0024887
13.1216	-0.00258164	0.00394262	0.000441716	0.00225976	-0.000368458	0.00254975	0.00225509	0.00112264	-0.00266765	0.0030902	-0.0047704	0.00373351	0.0411998	0.00958171	0.0678797	0.0157294	0.109928	0.00373698	0.119553	0.00242097
13.216	-0.00281167	0.00397986	0.00046497	0.00228919	-0.00123603	0.00243154	0.00248829	0.000886495	-0.00316037	0.00294744	-0.00467069	0.00380089	0.0397342	0.00955168	0.0654809	0.0152122	0.106389	0.00371621	0.115607	0.00231663
13.3104	-0.00262595	0.00390041	0.000655257	0.00213092	-0.00170954	0.00260278	0.00271379	0.000782953	-0.00363247	0.00284198	-0.00487272	0.0039008	0.0380196	0.00901749	0.063015	0.0149261	0.102871	0.00366467	0.11196	0.00227869
13.4048	-0.0027091	0.00382968	0.00081097	0.0019625	-0.00215234	0.00251174	0.00291653	0.000684903	-0.0040047	0.00272155	-0.00503303	0.00402577	0.0364094	0.00870187	0.0605615	0.0145813	0.0992546	0.0036368	0.108111	0.00220847
13.4992	-0.0028683	0.00374786	0.000922918	0.00192889	-0.00270199	0.00242292	0.00297142	0.000740022	-0.0042231	0.00252321	-0.00477403	0.0039623	0.0349782	0.00863988	0.0581843	0.0142563	0.0955853	0.00360115	0.104176	0.00215049
13.5936	-0.00261836	0.00332353	0.00120716	0.00171838	-0.00299412	0.00264156	0.00316668	0.000650588	-0.00492569	0.00225402	-0.00520977	0.00430521	0.0329819	0.00798599	0.0555701	0.0137689	0.0919564	0.00361563	0.10054	0.00209068
13.688	-0.00289654	0.00326206	0.00123013	0.00175649	-0.00368711	0.0024742	0.00297526	0.000805881	-0.00494504	0.00199134	-0.00466178	0.00421494	0.0316734	0.00812376	0.0532034	0.0134214	0.0882789	0.00358567	0.0965548	0.0020057
13.7824	-0.00244883	0.00280904	0.00146359	0.00159793	-0.00355068	0.00268576	0.00315622	0.000761436	-0.0052537	0.00172699	-0.00497846	0.00450687	0.0297922	0.00762908	0.050636	0.0130725	0.0845152	0.00357332	0.0927363	0.0019956
13.8768	-0.00262068	0.00272985	0.00130739	0.00162758	-0.00393139	0.00243998	0.00286364	0.00081307	-0.00509513	0.00146099	-0.00475044	0.00452816	0.0283435	0.00761304	0.0481604	0.0127304	0.080793	0.0035751	0.0887855	0.00192508
13.9712	-0.00239689	0.00243117	0.0012416	0.00162344	-0.00424175	0.00252263	0.00253848	0.00086743	-0.00516607	0.00123863	-0.00464248	0.00463049	0.0267047	0.00747829	0.0456869	0.0122641	0.0771882	0.00359249	0.0849732	0.00186408
14.0656	-0.0019132	0.00186827	0.00131271	0.00145306	-0.00407824	0.00262751	0.00247842	0.000820441	-0.00530269	0.00105492	-0.00500606	0.00492057	0.0248074	0.00700982	0.0431118	0.0118126	0.0734305	0.00362757	0.0811573	0.00183007
14.16	-0.00197238	0.00185484	0.000891365	0.00156579	-0.00433614	0.00246111	0.00185885	0.000933677	-0.00495147	0.00099785	-0.00474716	0.00480164	0.0234735	0.00710215	0.0406977	0.0115194	0.0699026	0.00363789	0.077361	0.00175354
14.2544	-0.00165257	0.00112387	0.00112381	0.00143121	-0.00428119	0.00262223	0.00185776	0.00109906	-0.00509237	0.000934053	-0.00491809	0.00488706	0.0216405	0.00690606	0.0380124	0.0112169	0.065817	0.00363884	0.0732584	0.00175457
14.3488	-0.00131159	0.000977466	0.000790528	0.00143161	-0.00411536	0.00259734	0.00113106	0.00114333	-0.00476437	0.00106395	-0.00492927	0.00481356	0.0200245	0.00673889	0.0354772	0.0107749	0.0622772	0.0036893	0.0695027	0.00164095
14.4432	-0.000838773	0.000501955	0.0010436	0.00128904	-0.00391789	0.00269181	0.000918971	0.00117868	-0.00483987	0.00118537	-0.0049242	0.00477693	0.018311	0.00668575	0.0329395	0.0102151	0.058687	0.00374449	0.0657299	0.00157576
14.5376	-0.00052187	0.000433808	0.000986866	0.00112974	-0.00354629	0.00277079	0.00058961	0.00122159	-0.00459324	0.0013381	-0.00507762	0.00461043	0.0166817	0.0065544	0.030451	0.009936	0.0550215	0.00376734	0.0619825	0.00152332
14.632	-0.00041886	0.000618658	0.000845191	0.00118707	-0.00307677	0.00269091	0.000211651	0.00123932	-0.00422568	0.00150299	-0.00529519	0.00436812	0.0151442	0.00645709	0.0279821	0.00977562	0.0515533	0.00378073	0.0583536	0.0014878
14.7264	0.000313772	0.000801195	0.00131704	0.000970066	-0.0024842	0.00282406	0.000316977	0.00126806	-0.00448479	0.00170669	-0.00544515	0.00429946	0.0130852	0.00621415	0.025369	0.00917602	0.0476833	0.0038411	0.0544478	0.00146049
14.8208	0.000363336	0.00082127	0.00110674	0.00091093	-0.0022111	0.00296078	-0.000445466	0.00117739	-0.00402241	0.00175128	-0.0054213	0.00382273	0.0117025	0.0064437	0.0228735	0.00887009	0.0442143	0.00386045	0.0507053	0.00138039
14.9152	0.000947385	0.00102734	0.00151669	0.00082088	-0.00162538	0.00301725	-0.000391256	0.00113924	-0.00407812	0.00193266	-0.00540933	0.00358835	0.00985328	0.00638642	0.0203326	0.00836584	0.0404832	0.00391765	0.0468526	0.00134711
15.0096	0.000840715	0.00114691	0.00124213	0.000947006	-0.00112698	0.00300525	-0.000717358	0.00111005	-0.00375725	0.00201599	-0.00586209	0.00317101	0.00831104	0.00630539	0.0178993	0.00837812	0.0370579	0.00391373	0.0432897	0.00131381
15.104	0.00120109	0.00109685	0.0012154	0.00103356	-0.000614181	0.0030362	-0.000935649	0.00106774	-0.00358828	0.00196152	-0.00585919	0.00274567	0.00664795	0.00642405	0.0153891	0.00785972	0.0335742	0.00396822	0.039535	0.00127044
15.1984	0.00182987	0.00130912	0.00150224	0.000943469	-0.000220944	0.00301763	-0.000564372	0.000989952	-0.00364973	0.00197732	-0.00590266	0.00245194	0.00465826	0.00632933	0.0128687	0.00730792	0.0297277	0.00401695	0.0356487	0.00122802
15.2928	0.00166133	0.00115146	0.00111457	0.00108574	0.000181575	0.00301059	-0.000983153	0.000992643	-0.0033671	0.00177782	-0.00622933	0.00197465	0.0033531	0.00646498	0.0105454	0.00723795	0.0266828	0.00402613	0.0322431	0.00120345
15.3872	0.00190029	0.00132616	0.00136099	0.00109898	0.000193814	0.00283816	-0.000497204	0.000932735	-0.00319746	0.00168104	-0.00625867	0.00155139	0.00139578	0.00637661	0.00805012	0.00684726	0.0228874	0.00405742	0.0284888	0.00115448
15.4816	0.00164486	0.00125336	0.00105468	0.00113165	0.000328758	0.00281662	-0.000747324	0.00101064	-0.00288291	0.00141008	-0.00673427	0.00139666	1.01384e-05	0.00650444	0.00567132	0.00679563	0.019708	0.00405727	0.0249998	0.00114506
15.576	0.00181412	0.00118716	0.00126496	0.00107969	0.000393576	0.00276571	-0.000644076	0.00105214	-0.00264064	0.00119523	-0.00680595	0.00120532	-0.00159486	0.00660189	0.00321275	0.00647611	0.0161477	0.00408846	0.0213304	0.00115521
15.6704	0.0018989	0.00123936	0.0013811	0.00110012	0.000314729	0.00259721	-0.000413714	0.00115283	-0.00237679	0.000956743	-0.00686807	0.00121165	-0.00333266	0.00660659	0.000839356	0.00606896	0.0127697	0.00413448	0.0178133	0.0011679
15.7648	0.0014235	0.00112495	0.00123036	0.00112122	0.000317001	0.00247766	-0.000629981	0.0013842	-0.0019348	0.000645724	-0.00732453	0.00185138	-0.00458548	0.00673006	-0.00145644	0.00613863	0.00965835	0.00412363	0.0144813	0.00117993
15.8592	0.00165112	0.00109825	0.00154529	0.00106164	0.0001678	0.00235124	-0.00035434	0.0013905	-0.0015245	0.000425218	-0.00714164	0.00189904	-0.00660571	0.00663324	-0.00392297	0.00564666	0.00602605	0.00414745	0.0108948	0.00114438
15.9536	0.00121152	0.000987746	0.00143283	0.00104386	0.000189013	0.00227295	-0.000734565	0.00168238	-0.00104035	0.000387	-0.00757838	0.00252495	-0.00775528	0.00676429	-0.00614502	0.00572145	0.00302344	0.00413929	0.0076275	0.00119266
16.048	0.00130504	0.000888289	0.0017038	0.000951485	0.000127259	0.00225379	-0.000878044	0.0016977	-0.00059946	0.000535547	-0.00748696	0.00270245	-0.00930837	0.00680592	-0.00855491	0.00547714	-0.000477124	0.00414876	0.00416495	0.00118707
16.1424	0.00134532	0.000949232	0.00184649	0.000896082	5.51389e-05	0.00223978	-0.000787562	0.00180653	-0.000232837	0.000909748	-0.00744319	0.00296063	-0.010722	0.00688866	-0.0107121	0.00523924	-0.00339477	0.00418965	0.000973496	0.00131597
16.2368	0.000835963	0.00103862	0.00165331	0.000801346	2.3614e-06	0.00211596	-0.00112379	0.00188367	0.000355605	0.00125189	-0.00803212	0.00351918	-0.0118853	0.00686227	-0.0127913	0.00556788	-0.00620681	0.00412226	-0.00199741	0.00131565
16.3312	0.00119248	0.00124175	0.0018778	0.000580098	-0.00027135	0.0023356	-0.000676549	0.00166689	0.000656448	0.00148887	-0.00773209	0.00365396	-0.0139119	0.0068127	-0.0152116	0.00502602	-0.00949124	0.00413752	-0.00536655	0.0013675
16.4256	0.000886449	0.00145528	0.00183189	0.000401498	-0.00029559	0.00227067	-0.000982445	0.00176859	0.000898674	0.00175134	-0.00805318	0.00388704	-0.014666	0.00698071	-0.0172277	0.00520549	-0.0122616	0.0041384	-0.0083856	0.00154725
16.52	0.00103079	0.00167984	0.00173705	0.000263526	-0.000549008	0.00238986	-0.000823969	0.00154182	0.00117589	0.00187991	-0.00804216	0.0041408	-0.0162759	0.00694228	-0.0194418	0.00500862	-0.0152263	0.00411227	-0.0114208	0.00156114
16.6144	0.000850476	0.00184892	0.00159639	0.00035039	-0.000690314	0.00224118	-0.00108304	0.00154483	0.00152745	0.00209435	-0.00834629	0.00437319	-0.0170233	0.00702488	-0.021436	0.00528189	-0.0181024	0.0040676	-0.0143005	0.00163737
16.7088	0.000815893	0.00204826	0.00135853	0.0004589	-0.000897447	0.00217946	-0.00121895	0.00145571	0.00157743	0.00218887	-0.00867033	0.00450981	-0.0183539	0.00703987	-0.0233377	0.00525799	-0.0205466	0.00404166	-0.0171237	0.00180477
16.8032	0.00109276	0.00217622	0.00116354	0.000651416	-0.00101551	0.00225867	-0.000862876	0.0012845	0.00159783	0.00219015	-0.00856103	0.0046445	-0.0198749	0.00704585	-0.025449	0.00509855	-0.0232902	0.00402654	-0.0200129	0.00189286
16.8976	0.000988672	0.00229749	0.000818593	0.000803299	-0.00116995	0.00199352	-0.000980297	0.00132523	0.00165849	0.00220282	-0.00898171	0.00465842	-0.0206089	0.0071189	-0.0271927	0.00533417	-0.0257664	0.00399832	-0.02268	0.0020487
16.992	0.00138176	0.00229219	0.000659142	0.00095555	-0.00120046	0.00196075	-0.000955746	0.0011388	0.00164596	0.00232159	-0.00896081	0.00485159	-0.0222697	0.00698745	-0.0290598	0.00527892	-0.0280621	0.00390997	-0.0252087	0.00204971
17.0864	0.0014466	0.00237413	0.000356706	0.0010602	-0.00138483	0.00179513	-0.00107436	0.00120675	0.00145416	0.00232027	-0.00911771	0.0047848	-0.0228962	0.00706799	-0.0306844	0.00553079	-0.0304368	0.0039042	-0.0278304	0.00223937
17.1808	0.00142881	0.00247975	-0.000149177	0.00105918	-0.00146248	0.00152179	-0.00105557	0.0011083	0.00142042	0.00233535	-0.00932899	0.004828	-0.0241152	0.00704498	-0.0325374	0.00552527	-0.0328997	0.00385979	-0.0304104	0.00229097
17.2752	0.00156558	0.00252306	-0.000550196	0.00115123	-0.00140681	0.00154096	-0.000867359	0.00100164	0.001262	0.00248326	-0.00914794	0.00476331	-0.0251648	0.00705467	-0.0343587	0.0055818	-0.0353682	0.00386286	-0.0330074	0.00233988
17.3696	0.0016162	0.00258571	-0.000634964	0.00118774	-0.00157232	0.00133039	-0.00122991	0.0011049	0.00099179	0.00246643	-0.00942879	0.00460844	-0.0259518	0.00707473	-0.0356537	0.00589413	-0.0371536	0.00381714	-0.035363	0.00258178
17.464	0.0017593	0.00255811	-0.000875425	0.00118924	-0.00153885	0.00129421	-0.00114218	0.000866873	0.000713789	0.00281435	-0.00910766	0.00464079	-0.0275643	0.00691429	-0.0374613	0.00577178	-0.0392937	0.00373096	-0.0375735	0.00249683
17.5584	0.00147866	0.00258916	-0.00124918	0.00114512	-0.00175499	0.00113512	-0.00120652	0.000920435	0.000467381	0.00272095	-0.00928557	0.0042746	-0.027946	0.00706061	-0.0388556	0.00614407	-0.0415574	0.00377685	-0.0401863	0.00273092
17.6528	0.00136398	0.00263245	-0.00150638	0.00117006	-0.0017102	0.000967773	-0.00113483	0.000752218	0.000398691	0.00294388	-0.00905958	0.00421613	-0.02943	0.00698094	-0.0405222	0.00612446	-0.043456	0.00375084	-0.0423481	0.0027602
17.7472	0.00100433	0.00253245	-0.00189424	0.00114631	-0.0017523	0.00093443	-0.00102751	0.000709655	0.000257038	0.00303522	-0.00896118	0.00394465	-0.0302433	0.00698526	-0.0419495	0.00630986	-0.0455867	0.00374737	-0.044669	0.00282694
17.8416	0.000828436	0.00243265	-0.00179274	0.00110717	-0.0021697	0.00119347	-0.00115007	0.000764254	-7.02119e-05	0.00296144	-0.00888858	0.00367073	-0.0308749	0.00703737	-0.0431618	0.00663373	-0.0475642	0.00371731	-0.0469854	0.00294254
17.936	0.000536682	0.00245529	-0.00207396	0.00119233	-0.0020215	0.0011487	-0.00107115	0.000585417	5.72619e-05	0.00317122	-0.00850182	0.00363915	-0.0325104	0.00687994	-0.0448686	0.00653663	-0.0492861	0.00368708	-0.0489618	0.00291496
18.0304	0.000151737	0.00234536	-0.00237585	0.00116556	-0.00201708	0.00136304	-0.000860653	0.000571284	-2.71056e-05	0.00303911	-0.00850654	0.00322472	-0.0330304	0.00700964	-0.0460655	0.00703107	-0.0513691	0.00376915	-0.0514275	0.00314067
18.1248	-0.000135148	0.00240247	-0.00231432	0.00111685	-0.00209023	0.00145267	-0.00109885	0.000424805	0.000231286	0.00318941	-0.00823566	0.00319466	-0.0344127	0.00687379	-0.0475232	0.00699171	-0.0529397	0.00369501	-0.0532404	0.00309108
18.2192	-0.00052387	0.00225142	-0.00224409	0.0010405	-0.00213934	0.0016062	-0.000862688	0.00048933	0.00025886	0.00319098	-0.00807037	0.00294458	-0.0350751	0.00690347	-0.0485772	0.00724435	-0.0548084	0.00361933	-0.0553359	0.00313902
18.3136	-0.000743807	0.00227594	-0.00220127	0.00109325	-0.00220041	0.00175532	-0.000927936	0.00054455	0.00043422	0.00314377	-0.00774605	0.00281009	-0.0360604	0.00686076	-0.04983	0.00748137	-0.0565542	0.00360847	-0.0573058	0.00320016
18.408	-0.00111127	0.00227346	-0.00221109	0.00112069	-0.00188391	0.00178907	-0.000948707	0.000596084	0.000803134	0.00316689	-0.00738538	0.00271736	-0.0372098	0.0067764	-0.0511094	0.00754628	-0.0581677	0.00360511	-0.0591211	0.00320441
18.5024	-0.00129991	0.00222333	-0.00215176	0.00123301	-0.00164689	0.0018143	-0.00073929	0.000813666	0.000835471	0.0030899	-0.00707145	0.0025371	-0.037882	0.00681896	-0.0520779	0.0079527	-0.0599578	0.00358663	-0.061137	0.00332463
18.5968	-0.00169002	0.00223368	-0.00151796	0.00121179	-0.00178861	0.00193075	-0.0010225	0.000825084	0.00127279	0.00315777	-0.00695931	0.00268453	-0.0390928	0.00670355	-0.0532686	0.00787377	-0.061192	0.0034719	-0.0626587	0.0032621
18.6912	-0.00189145	0.00223857	-0.00180092	0.00137583	-0.00127383	0.00182466	-0.000694364	0.00105219	0.00118235	0.0031426	-0.00656416	0.00255111	-0.0397952	0.00671327	-0.0541602	0.00816118	-0.0628603	0.00339136	-0.0645231	0.00334204
18.7856	-0.00225786	0.00219022	-0.00152202	0.0014459	-0.00123784	0.00183382	-0.000945107	0.00119238	0.00156498	0.00301715	-0.00632414	0.00251319	-0.0409637	0.00663763	-0.0553787	0.00836837	-0.0643991	0.00347792	-0.0662421	0.00340905
18.88	-0.00266017	0.00223792	-0.00178664	0.00147506	-0.000795104	0.00179416	-0.000851576	0.00129656	0.00148556	0.00302123	-0.00600814	0.00250113	-0.0418008	0.006628	-0.0563384	0.00849163	-0.0658621	0.00340929	-0.0679028	0.0034207
18.9744	-0.0029609	0.0021791	-0.00165187	0.00160629	-0.000620779	0.00164259	-0.000444971	0.00155087	0.00135197	0.00306132	-0.00567016	0.00249737	-0.0424156	0.00666496	-0.0571748	0.00876339	-0.0674627	0.00332483	-0.0696329	0.00346701
19.0688	-0.00299817	0.00204175	-0.00147614	0.00151328	-0.000440326	0.00170157	-0.00101998	0.00143251	0.00151737	0.00283636	-0.00592758	0.00275286	-0.0437823	0.00650393	-0.0581269	0.00856225	-0.0681482	0.00318385	-0.0707021	0.00344886
19.1632	-0.00335676	0.00210662	-0.00194017	0.00155692	4.73597e-05	0.00146488	-0.00053605	0.00169695	0.000956206	0.00286347	-0.00554073	0.00273774	-0.044266	0.00659642	-0.0588838	0.0089411	-0.0698748	0.00313808	-0.0725101	0.0035166
19.2576	-0.00357154	0.00179843	-0.00153394	0.00149747	0.000138978	0.00145811	-0.000899995	0.00169777	0.00111453	0.00256363	-0.00552657	0.00281988	-0.0456676	0.00649155	-0.0599562	0.00901473	-0.0709905	0.00323376	-0.0738755	0.0035862
19.352	-0.0037591	0.00190251	-0.00196965	0.00143018	0.000606671	0.00127645	-0.00053523	0.00173267	0.000515903	0.00261787	-0.00547542	0.00298543	-0.0461988	0.00656869	-0.0605651	0.00913091	-0.0722483	0.00302702	-0.0753097	0.00358381
19.4464	-0.00390799	0.00165952	-0.00136697	0.00141068	0.000642258	0.00114003	-0.000357236	0.00186063	0.000344811	0.00258917	-0.00526137	0.00301281	-0.0470234	0.00658237	-0.0613521	0.0092458	-0.0734675	0.00297474	-0.076691	0.00359188
19.5408	-0.00409689	0.00148189	-0.00149526	0.00129024	0.000884127	0.00110376	-0.000648305	0.00174145	0.000231407	0.00237076	-0.00507527	0.00311407	-0.0481274	0.00653756	-0.062332	0.00925614	-0.0746885	0.00299832	-0.0780407	0.00359521
19.6352	-0.0043757	0.00170265	-0.00180756	0.00124403	0.00119441	0.00106484	-0.000404079	0.00181459	-0.000408732	0.00237838	-0.00507133	0.00321237	-0.0487058	0.00663511	-0.0629568	0.00961717	-0.0760943	0.00294933	-0.0796006	0.00367891
19.7296	-0.00428102	0.00122393	-0.00106631	0.00119249	0.00126251	0.000839287	-0.000790881	0.00178985	-0.000419381	0.00207126	-0.00514494	0.0032063	-0.0500373	0.00653611	-0.0637815	0.00949232	-0.0767867	0.00291611	-0.0805755	0.00368006
19.824	-0.00439592	0.00142467	-0.00104181	0.00119348	0.00138774	0.000837249	-0.000309516	0.00182208	-0.00105009	0.00213914	-0.00520525	0.00334698	-0.0504255	0.00668375	-0.0643018	0.00958361	-0.0779705	0.00273923	-0.0818909	0.00365147
19.9184	-0.00463217	0.0012146	-0.000890749	0.00131646	0.00139232	0.000819227	-0.000630721	0.00187395	-0.00139993	0.00187337	-0.0050879	0.00324417	-0.0515417	0.0066369	-0.0651238	0.00977991	-0.0791714	0.00281408	-0.0831929	0.00369164
20.0128	-0.00476865	0.00123842	-0.000847081	0.00146987	0.00137509	0.000750731	-0.000540174	0.00184143	-0.00174264	0.00179647	-0.00516874	0.0032449	-0.052604	0.00667812	-0.0657894	0.00981415	-0.0800616	0.00278373	-0.0843131	0.0037109
20.1072	-0.00496479	0.00139781	-0.00106165	0.00165756	0.00117512	0.000869071	-0.000444384	0.00195535	-0.00220314	0.00188733	-0.00505553	0.00324753	-0.0532441	0.00670066	-0.066456	0.0100687	-0.0815218	0.00277283	-0.0857025	0.00371241
20.2016	-0.00463188	0.00140643	-0.000454395	0.00184375	0.00113955	0.000722554	-0.000426041	0.00187573	-0.00231026	0.00164947	-0.00498634	0.00308624	-0.0541993	0.00672527	-0.0670702	0.00972907	-0.0819364	0.00258432	-0.0865243	0.00366319
20.296	-0.00483231	0.0015699	-0.000720643	0.00201429	0.000848382	0.000777516	-0.000203087	0.00186897	-0.00280927	0.00186476	-0.00524001	0.00328987	-0.0547388	0.00681254	-0.0675603	0.00996829	-0.0832563	0.00253755	-0.0878917	0.00371529
20.3904	-0.00472498	0.00179976	-0.000443609	0.00211139	0.000612883	0.000737206	-0.00039413	0.00190408	-0.00286516	0.00177404	-0.00497747	0.00294488	-0.0559477	0.00681936	-0.0683376	0.009964	-0.0841728	0.00256435	-0.0889638	0.00372869
20.4848	-0.00456633	0.00195971	-0.000184347	0.00219789	0.000310567	0.000640212	-0.000216193	0.0018649	-0.00294873	0.00187691	-0.00511123	0.00298005	-0.0566936	0.00688561	-0.068808	0.0100604	-0.0851426	0.00251979	-0.0901089	0.00378123
20.5792	-0.00431656	0.00210905	0.000241499	0.00232546	-2.13759e-05	0.000583533	-0.00021305	0.00193578	-0.00296141	0.00194393	-0.00502789	0.00278971	-0.0574829	0.00690554	-0.0694208	0.0101961	-0.0863355	0.00249877	-0.0912982	0.00380904
20.6736	-0.00390452	0.00241625	0.000503149	0.00225229	-0.000281803	0.000567884	-0.000241317	0.0018275	-0.00247144	0.00186529	-0.00466701	0.00245417	-0.0585556	0.00696023	-0.070006	0.00996387	-0.0868955	0.00242355	-0.0921591	0.00381453
20.768	-0.00338431	0.00243646	0.00078228	0.00226728	-0.000690349	0.000372736	-0.000441987	0.00179533	-0.00242406	0.00199474	-0.00502148	0.0026333	-0.0589848	0.00698601	-0.0703668	0.0100753	-0.0881144	0.00234907	-0.09338	0.00385134
20.8624	-0.00313837	0.00277303	0.00099027	0.00212382	-0.000683069	0.000460946	-0.000432663	0.00170037	-0.0019855	0.00187902	-0.00470851	0.00221894	-0.0601627	0.00706082	-0.0708558	0.00993975	-0.0886589	0.00232123	-0.094264	0.00388339
20.9568	-0.00261165	0.00270399	0.00139745	0.00224524	-0.00119532	0.000264047	-0.000632437	0.00166612	-0.00157537	0.00196235	-0.00471436	0.00201215	-0.0608855	0.007104	-0.0713753	0.0101076	-0.0899054	0.00235111	-0.0954724	0.00391545
21.0512	-0.00226734	0.00285173	0.00171718	0.00219002	-0.0012515	0.000297874	-0.000682211	0.00153888	-0.0011377	0.00198045	-0.00475621	0.00186276	-0.0615503	0.00714697	-0.0717226	0.00998117	-0.0906128	0.00224208	-0.0964522	0.00393867
21.1456	-0.00178856	0.00300393	0.00162669	0.00212456	-0.00155665	0.000504857	-0.000904462	0.00140625	-0.000641319	0.00200582	-0.00434555	0.00149209	-0.0628285	0.00726196	-0.072337	0.0101238	-0.0915714	0.00236711	-0.0974739	0.00400382
21.24	-0.00109237	0.00297845	0.00159006	0.00213845	-0.00187696	0.000577873	-0.00127672	0.00136548	-0.000202702	0.00207602	-0.00472208	0.00126284	-0.0634997	0.00725241	-0.0726353	0.0101454	-0.0925944	0.00231898	-0.0985503	0.00404705
21.3344	-0.000812237	0.00324378	0.00138379	0.00202093	-0.00174614	0.000663911	-0.00138158	0.00128186	5.74338e-05	0.00195259	-0.0044128	0.00110745	-0.0642896	0.0072921	-0.0728822	0.00992771	-0.0931232	0.00218381	-0.0994241	0.00405688
21.4288	-0.000511882	0.00295323	0.00185407	0.00223152	-0.00190683	0.000749635	-0.00167374	0.00113731	0.000506062	0.0021991	-0.00442518	0.00114322	-0.0649916	0.00734105	-0.0734664	0.0101193	-0.0942514	0.00220465	-0.100624	0.00409032
21.5232	-0.000294254	0.00317257	0.0015471	0.002109	-0.00173944	0.00081341	-0.00173272	0.00107748	0.000803076	0.00213378	-0.00422562	0.00124787	-0.0657333	0.00743335	-0.0737329	0.0100222	-0.0948809	0.00218085	-0.101538	0.00414016
21.6176	7.99265e-05	0.00307676	0.00124325	0.002251	-0.00192526	0.000907322	-0.00195327	0.00113256	0.00117216	0.00204499	-0.00386315	0.00142217	-0.0670841	0.00750172	-0.0742893	0.0101752	-0.0958079	0.00228061	-0.102503	0.00417872
21.712	0.000352495	0.00290789	0.00122916	0.00232147	-0.00190685	0.000872515	-0.00213531	0.00108136	0.00141092	0.00219629	-0.00422363	0.00146254	-0.0674462	0.00750105	-0.0746419	0.0102355	-0.0967159	0.00228434	-0.103568	0.00419787
21.8064	0.000335308	0.00298287	0.00117395	0.00243772	-0.00150904	0.000785723	-0.00204702	0.00135796	0.00151269	0.00199463	-0.00367444	0.00184658	-0.0679699	0.00748398	-0.0748265	0.0099582	-0.0972635	0.00207895	-0.104495	0.00417335
21.9008	0.000536394	0.00269437	0.000994847	0.00246541	-0.00160684	0.000861454	-0.00213065	0.00131826	0.00187412	0.00215813	-0.00346674	0.00215519	-0.0692047	0.00764551	-0.0755715	0.0103	-0.0982578	0.0022868	-0.105511	0.00422348
21.9952	0.000530313	0.00286058	0.000795702	0.00239577	-0.00130618	0.000688816	-0.00199914	0.00165281	0.00182396	0.00197979	-0.00314208	0.00232156	-0.0697121	0.00766395	-0.0756295	0.0100818	-0.0988696	0.00214183	-0.106396	0.00422977
22.0896	0.00052602	0.00261906	0.000715133	0.00239264	-0.00126842	0.000671165	-0.0019445	0.00171551	0.00204507	0.00209155	-0.00293567	0.00255098	-0.0708146	0.00776999	-0.0763009	0.010329	-0.099734	0.00227997	-0.107358	0.00424764
22.184	0.00040822	0.0024774	0.000645422	0.00241287	-0.000860264	0.000557901	-0.00188037	0.00175937	0.00181905	0.00209497	-0.00329981	0.00259156	-0.0705948	0.00763958	-0.0765245	0.0102015	-0.100532	0.00212079	-0.108457	0.00419773
22.2784	0.000241881	0.00246967	0.000512571	0.00236276	-0.00069629	0.000403982	-0.00160975	0.00196824	0.00173087	0.00207469	-0.00274409	0.00293643	-0.0718406	0.00780132	-0.0768163	0.0102312	-0.101154	0.00215899	-0.109245	0.00424539
22.3728	0.000259146	0.00228543	7.83003e-05	0.00224283	-0.000769172	0.000506574	-0.00171134	0.00181866	0.00180473	0.00219879	-0.00278163	0.00294917	-0.0724428	0.00783118	-0.0774404	0.010408	-0.102012	0.00221367	-0.11021	0.00422502
22.4672	6.56395e-05	0.00237131	-6.65356e-05	0.00216837	-0.000303057	0.000317236	-0.00141867	0.00201045	0.00141955	0.00211559	-0.00249913	0.00306289	-0.0729824	0.00784345	-0.077476	0.0102791	-0.102602	0.00211302	-0.111087	0.00424744
22.5616	-0.000214257	0.00215718	-0.000166189	0.00207563	-0.000219679	0.000385061	-0.00144488	0.00181855	0.00131488	0.0022318	-0.00247928	0.00317589	-0.0737729	0.00795042	-0.078147	0.0105098	-0.103365	0.00221561	-0.112001	0.00425288
22.656	-0.000403588	0.00205724	-0.000435	0.00206662	-1.89167e-05	0.000443489	-0.00151659	0.00175244	0.00101613	0.00218487	-0.00241921	0.00323427	-0.0740708	0.00789496	-0.0783745	0.0104655	-0.104067	0.00212563	-0.112961	0.00424686
22.7504	-0.000680107	0.00193614	-0.000504315	0.00192722	0.000158623	0.000579085	-0.00135034	0.00165698	0.00083758	0.00227987	-0.00249968	0.00314989	-0.0745235	0.00787203	-0.0785739	0.0104576	-0.104758	0.002123	-0.113897	0.00421994
22.8448	-0.000933329	0.00183109	-0.000776224	0.00178808	0.000141149	0.00049535	-0.00146485	0.00155763	0.000918087	0.00218047	-0.00217819	0.00335223	-0.0757451	0.0080876	-0.0792971	0.0107088	-0.105368	0.00221145	-0.114546	0.00427067
22.9392	-0.00115729	0.00173592	-0.000752933	0.00176034	0.000593975	0.000898233	-0.00126234	0.00155048	0.000659096	0.00216018	-0.00210961	0.00320298	-0.0755874	0.00796293	-0.0790425	0.0104352	-0.106025	0.00207756	-0.115595	0.0042288
23.0336	-0.00157076	0.0014768	-0.000742616	0.00172502	0.000288032	0.000955288	-0.00151191	0.00134363	0.000534661	0.00207031	-0.00204675	0.00328488	-0.0764428	0.00808926	-0.0801702	0.0107977	-0.106658	0.00215378	-0.116368	0.00426217
23.128	-0.00156804	0.00134359	-0.00104525	0.0016178	0.000728132	0.00104655	-0.00132304	0.00135887	0.000642088	0.00192293	-0.00196215	0.00316865	-0.0764219	0.00799991	-0.0799463	0.0105385	-0.10741	0.00209881	-0.117347	0.00419956
23.2224	-0.00193649	0.00125198	-0.00102775	0.00143519	0.000543116	0.000930755	-0.0013485	0.0012366	0.000712912	0.00184779	-0.00184444	0.00321792	-0.0772416	0.00813104	-0.0804614	0.0106846	-0.108018	0.00211208	-0.118002	0.00420751
23.3168	-0.00197102	0.00115848	-0.00118818	0.00143013	0.000507381	0.000898081	-0.00143771	0.00114355	0.000855687	0.0016442	-0.00151636	0.00330805	-0.0779746	0.00828832	-0.0808845	0.0107499	-0.108597	0.00210196	-0.118686	0.00420701
23.4112	-0.0020143	0.00106656	-0.00130003	0.00151885	0.000859276	0.00108883	-0.00136096	0.000923418	0.000543073	0.00153184	-0.00146001	0.00329189	-0.0778346	0.00822277	-0.0811851	0.0106861	-0.109363	0.00208616	-0.119657	0.00415148
23.5056	-0.00208645	0.000997765	-0.00144903	0.00144273	0.000470347	0.000866217	-0.00147255	0.000742605	0.000579689	0.00144045	-0.00152462	0.0032838	-0.0786219	0.00837163	-0.0818512	0.0108818	-0.109927	0.00212505	-0.120196	0.00413815
23.6	-0.00191006	0.000849478	-0.00181331	0.00178456	0.000685883	0.00105831	-0.00116688	0.000589866	0.000512167	0.00124774	-0.00112703	0.00322749	-0.0787181	0.00843012	-0.0818559	0.0106835	-0.110619	0.00205682	-0.121139	0.00409336
23.6944	-0.00204754	0.000801929	-0.00176562	0.00174231	0.000487444	0.000762984	-0.00126195	0.000443458	0.000601892	0.00116147	-0.00141694	0.00324182	-0.0789996	0.00844038	-0.0824372	0.0108563	-0.111317	0.00206044	-0.121739	0.00403793
23.7888	-0.00154005	0.000805244	-0.0021284	0.00185749	0.000649234	0.000968408	-0.001322	0.000400838	0.000417989	0.00106473	-0.00138785	0.00335527	-0.0790302	0.00842717	-0.0827734	0.0107101	-0.112002	0.00210753	-0.122671	0.00397331
23.8832	-0.00132452	0.000729496	-0.00220416	0.00196602	0.000593216	0.000935152	-0.00108431	0.000524563	0.000393509	0.00109503	-0.00147341	0.0032644	-0.0789571	0.00838141	-0.0831187	0.0106867	-0.11274	0.00211508	-0.123427	0.003905
23.9776	-0.00134043	0.000735762	-0.00225914	0.00203759	0.000355807	0.000930546	-0.000959641	0.000693568	0.000566144	0.00108547	-0.00154003	0.00350013	-0.079615	0.00857024	-0.0836315	0.0108922	-0.113263	0.00207632	-0.123765	0.00388113
24.072	-0.000628558	0.000661065	-0.00273453	0.00228331	0.000478431	0.00124018	-0.000552309	0.000912926	0.000576484	0.00120706	-0.00141517	0.00352756	-0.0794384	0.00857993	-0.0836373	0.0105275	-0.114069	0.00213503	-0.124753	0.00379952
24.1664	-0.000740707	0.000663577	-0.00265475	0.00221488	0.000306133	0.00122198	-0.000501783	0.0011153	0.00064892	0.0012102	-0.00149642	0.00352492	-0.0796189	0.00859498	-0.0843052	0.0108307	-0.114623	0.00205404	-0.12523	0.00376633
24.2608	-0.000177314	0.000683192	-0.00303536	0.00231191	0.000358104	0.00147189	-0.000386027	0.00142522	0.000626197	0.00141129	-0.00159592	0.00366761	-0.0796004	0.00858457	-0.0846071	0.0106145	-0.115336	0.00215934	-0.126075	0.00371223
24.3552	-2.02636e-05	0.00065475	-0.00307677	0.00237057	0.000346338	0.00155471	-3.38378e-05	0.00167731	0.000871677	0.00149616	-0.00167541	0.00373267	-0.0794916	0.00858353	-0.0849317	0.010701	-0.116053	0.00210115	-0.126623	0.00363498
24.4496	8.36072e-05	0.000687344	-0.00321156	0.00233199	0.000180263	0.0016938	-1.81434e-05	0.00192835	0.000866548	0.0015498	-0.00201372	0.00394042	-0.0796326	0.00858116	-0.0853941	0.0108601	-0.11658	0.00208543	-0.127019	0.00361815
24.544	0.000769466	0.00051294	-0.00362749	0.00238044	0.000396479	0.00177331	0.000196772	0.00210189	0.00106736	0.00181833	-0.00184309	0.00410308	-0.0795768	0.00870327	-0.085408	0.0103393	-0.117421	0.00222337	-0.127987	0.00353721
24.6384	0.000643299	0.000670499	-0.00371084	0.00226772	0.000287068	0.00190197	0.00015736	0.00232703	0.000952856	0.00187006	-0.00205727	0.00406551	-0.0791327	0.00841394	-0.0862602	0.0108819	-0.11787	0.00214673	-0.128399	0.00351943

## Sheet: Figure 4G
time	N	N SEM	P	P SEM
1	0.755	0.005	1.1175	0.035125
4	0.745	0.0132288	2.5	0.067602
7	0.735	0.0074162	4.325	0.215743
10	0.735	0.005	4.795	0.136143
14	0.7375	0.0037081	6.0475	0.287652
18	0.755	0.00921954	7.765	0.090857
21	0.7325	0.00661438	8.6675	0.142105
25	0.74	0.0114018	8.95	0.108536
28	0.7475	0.0048734	9.49	0.139964

## Sheet: Figure 4H
Time (in Hrs)	P	N
0	0	0
0.000694444	0	0
0.00138889	0.002	0
0.00208333	0.003	0
0.00277778	0.005	0
0.00347222	0.006	0
0.00416667	0.009	0
0.00486111	0.01	0
0.00555556	0.013	0
0.00625	0.014	0
0.00694444	0.015	0
0.00763889	0.015	0
0.00833333	0.016	0
0.00902778	0.018	0
0.00972222	0.02	0
0.0104167	0.022	0
0.0111111	0.022	0
0.0118056	0.022	0
0.0125	0.024	0
0.0131944	0.026	0
0.0138889	0.029	0
0.0145833	0.03	0
0.0152778	0.031	0
0.0159722	0.035	0
0.0166667	0.037	0
0.0173611	0.038	0
0.0180556	0.038	0
0.01875	0.038	0
0.0194444	0.038	0
0.0201389	0.039	0
0.0208333	0.039	0
0.0215278	0.04	0
0.0222222	0.042	0
0.0229167	0.042	0
0.0236111	0.044	0
0.0243056	0.045	0
0.025	0.048	0
0.0256944	0.05	0
0.0263889	0.053	0
0.0270833	0.054	0
0.0277778	0.056	0
0.0284722	0.058	0
0.0291667	0.062	0
0.0298611	0.062	0
0.0305556	0.064	0
0.03125	0.065	0
0.0319444	0.065	0
0.0326389	0.067	0
0.0333333	0.069	0
0.0340278	0.07	0
0.0347222	0.071	0
0.0354167	0.074	0
0.0361111	0.075	0
0.0368056	0.076	0
0.0375	0.078	0
0.0381944	0.081	0
0.0388889	0.082	0
0.0395833	0.083	0
0.0402778	0.085	0
0.0409722	0.086	0
0.0416667	0.088	0
0.0423611	0.09	0
0.0430556	0.091	0
0.04375	0.093	0
0.0444444	0.094	0
0.0451389	0.097	0
0.0458333	0.099	0
0.0465278	0.102	0
0.0472222	0.102	0
0.0479167	0.102	0
0.0486111	0.104	0
0.0493056	0.106	0
0.05	0.108	0
0.0506944	0.11	0
0.0513889	0.112	0
0.0520833	0.114	0
0.0527778	0.115	0
0.0534722	0.116	0
0.0541667	0.117	0
0.0548611	0.118	0
0.0555556	0.119	0
0.05625	0.122	0
0.0569444	0.123	0
0.0576389	0.127	0
0.0583333	0.13	0
0.0590278	0.13	0
0.0597222	0.13	0
0.0604167	0.132	0
0.0611111	0.134	0
0.0618056	0.136	0
0.0625	0.136	0
0.0631944	0.141	0
0.0638889	0.143	0
0.0645833	0.144	0
0.0652778	0.145	0
0.0659722	0.145	0
0.0666667	0.145	0
0.0673611	0.146	0
0.0680556	0.149	0
0.06875	0.153	0
0.0694444	0.154	0
0.0701389	0.156	0
0.0708333	0.158	0
0.0715278	0.162	0
0.0722222	0.164	0
0.0729167	0.165	0
0.0736111	0.168	0
0.0743056	0.17	0
0.075	0.17	0
0.0756944	0.17	0
0.0763889	0.172	0
0.0770833	0.174	0
0.0777778	0.174	0
0.0784722	0.175	0
0.0791667	0.177	0
0.0798611	0.178	0
0.0805556	0.179	0
0.08125	0.18	0
0.0819444	0.18	0
0.0826389	0.18	0
0.0833333	0.182	0
0.0840278	0.183	0
0.0847222	0.184	0
0.0854167	0.187	0
0.0861111	0.189	0
0.0868056	0.19	0
0.0875	0.191	0
0.0881944	0.191	0
0.0888889	0.193	0
0.0895833	0.194	0
0.0902778	0.194	0
0.0909722	0.197	0
0.0916667	0.198	0
0.0923611	0.199	0
0.0930556	0.202	0
0.09375	0.205	0
0.0944444	0.206	0
0.0951389	0.206	0
0.0958333	0.206	0
0.0965278	0.207	0
0.0972222	0.21	0
0.0979167	0.211	0
0.0986111	0.213	0
0.0993056	0.217	0
0.1	0.218	0
0.100694	0.218	0
0.101389	0.221	0
0.102083	0.222	0
0.102778	0.222	0
0.103472	0.222	0
0.104167	0.222	0
0.104861	0.225	0
0.105556	0.225	0
0.10625	0.227	0
0.106944	0.23	0
0.107639	0.23	0
0.108333	0.232	0
0.109028	0.233	0
0.109722	0.235	0
0.110417	0.235	0
0.111111	0.236	0
0.111806	0.237	0
0.1125	0.238	0
0.113194	0.24	0
0.113889	0.24	0
0.114583	0.242	0
0.115278	0.243	0
0.115972	0.245	0
0.116667	0.246	0
0.117361	0.247	0
0.118056	0.248	0
0.11875	0.249	0
0.119444	0.25	0
0.120139	0.25	0
0.120833	0.253	0
0.121528	0.253	0
0.122222	0.254	0
0.122917	0.254	0
0.123611	0.254	0
0.124306	0.256	0
0.125	0.258	0
0.125694	0.258	0
0.126389	0.258	0
0.127083	0.259	0
0.127778	0.261	0
0.128472	0.265	0
0.129167	0.267	0
0.129861	0.27	0
0.130556	0.27	0
0.13125	0.271	0
0.131944	0.273	0
0.132639	0.274	0
0.133333	0.276	0
0.134028	0.278	0
0.134722	0.278	0
0.135417	0.28	0
0.136111	0.282	0
0.136806	0.282	0
0.1375	0.285	0
0.138194	0.287	0
0.138889	0.29	0
0.139583	0.294	0
0.140278	0.298	0
0.140972	0.298	0
0.141667	0.3	0
0.142361	0.3	0
0.143056	0.302	0
0.14375	0.306	0
0.144444	0.307	0
0.145139	0.308	0
0.145833	0.308	0
0.146528	0.31	0
0.147222	0.31	0
0.147917	0.311	0
0.148611	0.314	0
0.149306	0.317	0
0.15	0.321	0
0.150694	0.322	0
0.151389	0.322	0
0.152083	0.323	0
0.152778	0.328	0
0.153472	0.33	0
0.154167	0.331	0
0.154861	0.331	0
0.155556	0.334	0
0.15625	0.335	0
0.156944	0.338	0
0.157639	0.34	0
0.158333	0.341	0
0.159028	0.341	0
0.159722	0.341	0
0.160417	0.342	0
0.161111	0.343	0
0.161806	0.345	0
0.1625	0.347	0
0.163194	0.348	0
0.163889	0.348	0
0.164583	0.35	0
0.165278	0.351	0
0.165972	0.354	0
0.166667	0.354	0
0.167361	0.357	0
0.168056	0.357	0
0.16875	0.358	0
0.169444	0.358	0
0.170139	0.358	0
0.170833	0.358	0
0.171528	0.364	0
0.172222	0.366	0
0.172917	0.369	0
0.173611	0.369	0
0.174306	0.369	0
0.175	0.37	0
0.175694	0.37	0
0.176389	0.372	0
0.177083	0.372	0
0.177778	0.374	0
0.178472	0.374	0
0.179167	0.377	0
0.179861	0.378	0
0.180556	0.379	0
0.18125	0.379	0
0.181944	0.38	0
0.182639	0.382	0
0.183333	0.382	0
0.184028	0.383	0
0.184722	0.384	0
0.185417	0.386	0
0.186111	0.387	0
0.186806	0.389	0
0.1875	0.389	0
0.188194	0.389	0
0.188889	0.39	0
0.189583	0.393	0
0.190278	0.394	0
0.190972	0.396	0
0.191667	0.396	0
0.192361	0.398	0
0.193056	0.398	0
0.19375	0.4	0
0.194444	0.401	0
0.195139	0.402	0
0.195833	0.404	0
0.196528	0.405	0
0.197222	0.406	0
0.197917	0.406	0
0.198611	0.407	0
0.199306	0.408	0
0.2	0.41	0
0.200694	0.41	0
0.201389	0.41	0
0.202083	0.41	0
0.202778	0.411	0
0.203472	0.411	0
0.204167	0.412	0
0.204861	0.415	0
0.205556	0.418	0
0.20625	0.418	0
0.206944	0.419	0
0.207639	0.419	0
0.208333	0.424	0
0.209028	0.428	0
0.209722	0.43	0
0.210417	0.431	0
0.211111	0.431	0
0.211806	0.433	0
0.2125	0.434	0
0.213194	0.434	0
0.213889	0.434	0
0.214583	0.438	0
0.215278	0.438	0
0.215972	0.438	0
0.216667	0.439	0
0.217361	0.44	0
0.218056	0.44	0
0.21875	0.442	0
0.219444	0.442	0
0.220139	0.444	0
0.220833	0.446	0
0.221528	0.446	0
0.222222	0.449	0
0.222917	0.449	0
0.223611	0.449	0
0.224306	0.45	0
0.225	0.45	0
0.225694	0.451	0
0.226389	0.451	0
0.227083	0.452	0
0.227778	0.453	0
0.228472	0.454	0
0.229167	0.454	0
0.229861	0.455	0
0.230556	0.456	0
0.23125	0.456	0
0.231944	0.457	0
0.232639	0.458	0
0.233333	0.458	0
0.234028	0.46	0
0.234722	0.461	0
0.235417	0.461	0
0.236111	0.462	0
0.236806	0.463	0
0.2375	0.464	0
0.238194	0.464	0
0.238889	0.465	0
0.239583	0.465	0
0.240278	0.465	0
0.240972	0.465	0
0.241667	0.466	0
0.242361	0.466	0
0.243056	0.466	0
0.24375	0.469	0
0.244444	0.469	0
0.245139	0.47	0
0.245833	0.475	0
0.246528	0.475	0
0.247222	0.476	0
0.247917	0.478	0
0.248611	0.48	0
0.249306	0.481	0
0.25	0.482	0
0.250694	0.483	0
0.251389	0.484	0
0.252083	0.486	0
0.252778	0.486	0
0.253472	0.488	0
0.254167	0.489	0
0.254861	0.49	0
0.255556	0.492	0
0.25625	0.494	0
0.256944	0.494	0
0.257639	0.494	0
0.258333	0.495	0
0.259028	0.498	0
0.259722	0.499	0
0.260417	0.5	0
0.261111	0.501	0
0.261806	0.501	0
0.2625	0.501	0
0.263194	0.502	0
0.263889	0.502	0
0.264583	0.504	0
0.265278	0.504	0
0.265972	0.506	0
0.266667	0.507	0
0.267361	0.508	0
0.268056	0.512	0
0.26875	0.514	0
0.269444	0.515	0
0.270139	0.516	0
0.270833	0.516	0
0.271528	0.519	0
0.272222	0.52	0
0.272917	0.521	0
0.273611	0.521	0
0.274306	0.523	0
0.275	0.525	0
0.275694	0.528	0
0.276389	0.529	0
0.277083	0.53	0
0.277778	0.535	0
0.278472	0.538	0
0.279167	0.539	0
0.279861	0.54	0
0.280556	0.542	0
0.28125	0.542	0
0.281944	0.546	0
0.282639	0.546	0
0.283333	0.547	0
0.284028	0.549	0
0.284722	0.55	0
0.285417	0.55	0
0.286111	0.55	0
0.286806	0.55	0
0.2875	0.551	0
0.288194	0.552	0
0.288889	0.554	0
0.289583	0.555	0
0.290278	0.557	0
0.290972	0.558	0
0.291667	0.558	0
0.292361	0.559	0
0.293056	0.56	0
0.29375	0.56	0
0.294444	0.56	0
0.295139	0.562	0
0.295833	0.562	0
0.296528	0.563	0
0.297222	0.563	0
0.297917	0.566	0
0.298611	0.567	0
0.299306	0.569	0
0.3	0.57	0
0.300694	0.57	0
0.301389	0.57	0
0.302083	0.571	0
0.302778	0.571	0
0.303472	0.573	0
0.304167	0.574	0
0.304861	0.574	0
0.305556	0.574	0
0.30625	0.574	0
0.306944	0.574	0
0.307639	0.575	0
0.308333	0.577	0
0.309028	0.578	0
0.309722	0.578	0
0.310417	0.579	0
0.311111	0.582	0
0.311806	0.582	0
0.3125	0.583	0
0.313194	0.586	0
0.313889	0.59	0
0.314583	0.592	0
0.315278	0.594	0
0.315972	0.594	0
0.316667	0.594	0
0.317361	0.595	0
0.318056	0.596	0
0.31875	0.597	0
0.319444	0.598	0
0.320139	0.599	0
0.320833	0.601	0
0.321528	0.602	0
0.322222	0.603	0
0.322917	0.605	0
0.323611	0.605	0
0.324306	0.606	0
0.325	0.606	0
0.325694	0.606	0
0.326389	0.607	0
0.327083	0.609	0
0.327778	0.61	0
0.328472	0.611	0
0.329167	0.611	0
0.329861	0.611	0
0.330556	0.613	0
0.33125	0.615	0
0.331944	0.617	0
0.332639	0.618	0
0.333333	0.621	0
0.334028	0.621	0
0.334722	0.623	0
0.335417	0.622	0
0.336111	0.623	0
0.336806	0.624	0
0.3375	0.626	0
0.338194	0.626	0
0.338889	0.627	0
0.339583	0.627	0
0.340278	0.628	0
0.340972	0.631	0
0.341667	0.632	0
0.342361	0.634	0
0.343056	0.634	0
0.34375	0.635	0
0.344444	0.635	0
0.345139	0.636	0
0.345833	0.636	0
0.346528	0.636	0
0.347222	0.636	0
0.347917	0.637	0
0.348611	0.638	0
0.349306	0.639	0
0.35	0.64	0
0.350694	0.642	0
0.351389	0.643	0
0.352083	0.646	0
0.352778	0.647	0
0.353472	0.647	0
0.354167	0.649	0
0.354861	0.648	0
0.355556	0.649	0
0.35625	0.65	0
0.356944	0.65	0
0.357639	0.651	0
0.358333	0.652	0
0.359028	0.655	0
0.359722	0.656	0
0.360417	0.657	0
0.361111	0.658	0
0.361806	0.66	0
0.3625	0.662	0
0.363194	0.662	0
0.363889	0.662	0
0.364583	0.661	0
0.365278	0.662	0
0.365972	0.662	0
0.366667	0.662	0
0.367361	0.664	0
0.368056	0.665	0
0.36875	0.666	0
0.369444	0.666	0
0.370139	0.667	0
0.370833	0.667	0
0.371528	0.667	0
0.372222	0.668	0
0.372917	0.67	0
0.373611	0.671	0
0.374306	0.673	0
0.375	0.674	0
0.375694	0.675	0
0.376389	0.678	0
0.377083	0.678	0
0.377778	0.679	0
0.378472	0.679	0
0.379167	0.679	0
0.379861	0.681	0
0.380556	0.682	0
0.38125	0.683	0
0.381944	0.685	0
0.382639	0.685	0
0.383333	0.686	0
0.384028	0.686	0
0.384722	0.686	0
0.385417	0.686	0
0.386111	0.688	0
0.386806	0.689	0
0.3875	0.689	0
0.388194	0.689	0
0.388889	0.69	0
0.389583	0.691	0
0.390278	0.692	0
0.390972	0.693	0
0.391667	0.692	0
0.392361	0.692	0
0.393056	0.694	0
0.39375	0.698	0
0.394444	0.7	0
0.395139	0.701	0
0.395833	0.703	0
0.396528	0.703	0
0.397222	0.703	0
0.397917	0.703	0
0.398611	0.706	0
0.399306	0.706	0
0.4	0.71	0
0.400694	0.711	0
0.401389	0.712	0
0.402083	0.714	0
0.402778	0.714	0
0.403472	0.715	0
0.404167	0.715	0
0.404861	0.715	0
0.405556	0.718	0
0.40625	0.72	0
0.406944	0.721	0
0.407639	0.722	0
0.408333	0.723	0
0.409028	0.723	0
0.409722	0.725	0
0.410417	0.725	0
0.411111	0.725	0
0.411806	0.726	0
0.4125	0.727	0
0.413194	0.726	0
0.413889	0.726	0
0.414583	0.727	0
0.415278	0.728	0
0.415972	0.729	0
0.416667	0.73	0
0.417361	0.73	0
0.418056	0.731	0
0.41875	0.733	0
0.419444	0.733	0
0.420139	0.734	0
0.420833	0.734	0
0.421528	0.735	0
0.422222	0.737	0
0.422917	0.738	0
0.423611	0.74	0
0.424306	0.74	0
0.425	0.74	0
0.425694	0.74	0
0.426389	0.74	0
0.427083	0.742	0
0.427778	0.743	0
0.428472	0.746	0
0.429167	0.746	0
0.429861	0.748	0
0.430556	0.749	0
0.43125	0.75	0
0.431944	0.753	0
0.432639	0.754	0
0.433333	0.754	0
0.434028	0.754	0
0.434722	0.753	0
0.435417	0.754	0
0.436111	0.754	0
0.436806	0.755	0
0.4375	0.756	0
0.438194	0.758	0
0.438889	0.758	0
0.439583	0.758	0
0.440278	0.76	0
0.440972	0.761	0
0.441667	0.762	0
0.442361	0.765	0
0.443056	0.765	0
0.44375	0.765	0
0.444444	0.766	0
0.445139	0.768	0
0.445833	0.767	0
0.446528	0.771	0
0.447222	0.772	0
0.447917	0.774	0
0.448611	0.777	0
0.449306	0.778	0
0.45	0.779	0
0.450694	0.778	0
0.451389	0.777	0
0.452083	0.779	0
0.452778	0.779	0
0.453472	0.781	0
0.454167	0.78	0
0.454861	0.781	0
0.455556	0.782	0
0.45625	0.784	0
0.456944	0.786	0
0.457639	0.788	0
0.458333	0.789	0
0.459028	0.789	0
0.459722	0.79	0
0.460417	0.79	0
0.461111	0.79	0
0.461806	0.79	0
0.4625	0.79	0
0.463194	0.79	0
0.463889	0.793	0
0.464583	0.794	0
0.465278	0.796	0
0.465972	0.796	0
0.466667	0.799	0
0.467361	0.799	0
0.468056	0.799	0
0.46875	0.799	0
0.469444	0.801	0
0.470139	0.802	0
0.470833	0.803	0
0.471528	0.803	0
0.472222	0.804	0
0.472917	0.804	0
0.473611	0.805	0
0.474306	0.804	0
0.475	0.805	0
0.475694	0.806	0
0.476389	0.806	0
0.477083	0.807	0
0.477778	0.808	0
0.478472	0.809	0
0.479167	0.811	0
0.479861	0.811	0
0.480556	0.811	0
0.48125	0.813	0
0.481944	0.813	0
0.482639	0.813	0
0.483333	0.813	0
0.484028	0.814	0
0.484722	0.814	0
0.485417	0.817	0
0.486111	0.816	0
0.486806	0.818	0
0.4875	0.818	0
0.488194	0.819	0
0.488889	0.821	0
0.489583	0.822	0
0.490278	0.822	0
0.490972	0.822	0
0.491667	0.822	0
0.492361	0.822	0
0.493056	0.823	0
0.49375	0.826	0
0.494444	0.826	0
0.495139	0.826	0
0.495833	0.828	0
0.496528	0.828	0
0.497222	0.829	0
0.497917	0.831	0
0.498611	0.832	0
0.499306	0.832	0
0.5	0.834	0
0.500694	0.834	0
0.501389	0.833	0
0.502083	0.835	0
0.502778	0.838	0
0.503472	0.839	0
0.504167	0.84	0
0.504861	0.841	0
0.505556	0.841	0
0.50625	0.841	0
0.506944	0.84	0
0.507639	0.841	0
0.508333	0.842	0
0.509028	0.842	0
0.509722	0.846	0
0.510417	0.848	0
0.511111	0.849	0
0.511806	0.85	0
0.5125	0.85	0
0.513194	0.85	0
0.513889	0.85	0
0.514583	0.849	0
0.515278	0.85	0
0.515972	0.85	0
0.516667	0.85	0
0.517361	0.852	0
0.518056	0.852	0
0.51875	0.852	0
0.519444	0.852	0
0.520139	0.853	0
0.520833	0.852	0
0.521528	0.853	0
0.522222	0.854	0
0.522917	0.856	0
0.523611	0.858	0
0.524306	0.858	0
0.525	0.858	0
0.525694	0.858	0
0.526389	0.858	0
0.527083	0.859	0
0.527778	0.859	0
0.528472	0.86	0
0.529167	0.861	0
0.529861	0.861	0
0.530556	0.862	0
0.53125	0.862	0
0.531944	0.863	0
0.532639	0.864	0
0.533333	0.866	0
0.534028	0.867	0
0.534722	0.868	0
0.535417	0.869	0
0.536111	0.87	0
0.536806	0.871	0
0.5375	0.874	0
0.538194	0.875	0
0.538889	0.876	0
0.539583	0.878	0
0.540278	0.878	0
0.540972	0.878	0
0.541667	0.879	0
0.542361	0.879	0
0.543056	0.88	0
0.54375	0.882	0
0.544444	0.882	0
0.545139	0.884	0
0.545833	0.886	0
0.546528	0.886	0
0.547222	0.886	0
0.547917	0.886	0
0.548611	0.886	0
0.549306	0.886	0
0.55	0.886	0
0.550694	0.888	0
0.551389	0.89	0
0.552083	0.892	0
0.552778	0.894	0
0.553472	0.898	0
0.554167	0.898	0
0.554861	0.899	0
0.555556	0.899	0
0.55625	0.9	0
0.556944	0.901	0
0.557639	0.899	0
0.558333	0.902	0
0.559028	0.903	0
0.559722	0.903	0
0.560417	0.906	0
0.561111	0.907	0
0.561806	0.91	0
0.5625	0.91	0
0.563194	0.909	0
0.563889	0.91	0
0.564583	0.91	0
0.565278	0.91	0
0.565972	0.91	0
0.566667	0.91	0
0.567361	0.91	0
0.568056	0.91	0
0.56875	0.911	0
0.569444	0.913	0
0.570139	0.913	0
0.570833	0.913	0
0.571528	0.914	0
0.572222	0.916	0
0.572917	0.918	0
0.573611	0.918	0
0.574306	0.917	0
0.575	0.917	0
0.575694	0.918	0
0.576389	0.918	0
0.577083	0.918	0
0.577778	0.918	0
0.578472	0.918	0
0.579167	0.918	0
0.579861	0.918	0
0.580556	0.92	0
0.58125	0.921	0
0.581944	0.922	0
0.582639	0.923	0
0.583333	0.924	0
0.584028	0.926	0
0.584722	0.926	0
0.585417	0.926	0
0.586111	0.926	0
0.586806	0.927	0
0.5875	0.93	0
0.588194	0.93	0
0.588889	0.932	0
0.589583	0.931	0
0.590278	0.933	0
0.590972	0.934	0
0.591667	0.935	0
0.592361	0.939	0
0.593056	0.938	0
0.59375	0.939	0
0.594444	0.939	0
0.595139	0.94	0
0.595833	0.941	0
0.596528	0.942	0
0.597222	0.942	0
0.597917	0.942	0
0.598611	0.942	0
0.599306	0.944	0
0.6	0.945	0
0.600694	0.946	0
0.601389	0.946	0
0.602083	0.947	0
0.602778	0.947	0
0.603472	0.947	0
0.604167	0.947	0
0.604861	0.947	0
0.605556	0.949	0
0.60625	0.949	0
0.606944	0.95	0
0.607639	0.95	0
0.608333	0.95	0
0.609028	0.952	0
0.609722	0.952	0
0.610417	0.951	0
0.611111	0.952	0
0.611806	0.95	0
0.6125	0.953	0
0.613194	0.953	0
0.613889	0.954	0
0.614583	0.954	0
0.615278	0.955	0
0.615972	0.956	0
0.616667	0.954	0
0.617361	0.955	0
0.618056	0.956	0
0.61875	0.956	0
0.619444	0.957	0
0.620139	0.958	0
0.620833	0.958	0
0.621528	0.96	0
0.622222	0.96	0
0.622917	0.963	0
0.623611	0.962	0
0.624306	0.964	0
0.625	0.966	0
0.625694	0.966	0
0.626389	0.966	0
0.627083	0.967	0
0.627778	0.97	0
0.628472	0.97	0
0.629167	0.968	0
0.629861	0.969	0
0.630556	0.969	0
0.63125	0.968	0
0.631944	0.97	0
0.632639	0.971	0
0.633333	0.971	0
0.634028	0.97	0
0.634722	0.971	0
0.635417	0.97	0
0.636111	0.969	0
0.636806	0.97	0
0.6375	0.97	0
0.638194	0.97	0
0.638889	0.97	0
0.639583	0.97	0
0.640278	0.972	0
0.640972	0.972	0
0.641667	0.973	0
0.642361	0.973	0
0.643056	0.974	0
0.64375	0.973	0
0.644444	0.973	0
0.645139	0.974	0
0.645833	0.974	0
0.646528	0.975	0
0.647222	0.974	0
0.647917	0.973	0
0.648611	0.974	0
0.649306	0.974	0
0.65	0.976	0
0.650694	0.977	0
0.651389	0.977	0
0.652083	0.978	0
0.652778	0.979	0
0.653472	0.978	0
0.654167	0.979	0
0.654861	0.98	0
0.655556	0.981	0
0.65625	0.981	0
0.656944	0.981	0
0.657639	0.981	0
0.658333	0.982	0
0.659028	0.982	0
0.659722	0.982	0
0.660417	0.983	0
0.661111	0.983	0
0.661806	0.984	0
0.6625	0.984	0
0.663194	0.984	0
0.663889	0.983	0
0.664583	0.983	0
0.665278	0.986	0
0.665972	0.986	0
0.666667	0.985	0
0.667361	0.985	0
0.668056	0.986	0
0.66875	0.986	0
0.669444	0.987	0
0.670139	0.99	0
0.670833	0.989	0
0.671528	0.989	0
0.672222	0.99	0
0.672917	0.99	0
0.673611	0.99	0
0.674306	0.99	0
0.675	0.992	0
0.675694	0.994	0
0.676389	0.994	0
0.677083	0.994	0
0.677778	0.994	0
0.678472	0.997	0
0.679167	0.998	0
0.679861	0.998	0
0.680556	0.998	0
0.68125	1.001	0
0.681944	1.002	0
0.682639	1.004	0
0.683333	1.003	0
0.684028	1.004	0
0.684722	1.005	0
0.685417	1.006	0
0.686111	1.005	0
0.686806	1.002	0
0.6875	1.002	0
0.688194	1.002	0
0.688889	1.006	0
0.689583	1.009	0
0.690278	1.01	0
0.690972	1.011	0
0.691667	1.011	0
0.692361	1.012	0
0.693056	1.013	0
0.69375	1.013	0
0.694444	1.013	0
0.695139	1.014	0
0.695833	1.016	0
0.696528	1.015	0
0.697222	1.015	0
0.697917	1.015	0
0.698611	1.015	0
0.699306	1.014	0
0.7	1.014	0
0.700694	1.013	0
0.701389	1.014	0
0.702083	1.017	0
0.702778	1.018	0
0.703472	1.017	0
0.704167	1.016	0
0.704861	1.016	0
0.705556	1.016	0
0.70625	1.018	0
0.706944	1.019	0
0.707639	1.019	0
0.708333	1.019	0
0.709028	1.018	0
0.709722	1.018	0
0.710417	1.018	0
0.711111	1.017	0
0.711806	1.018	0
0.7125	1.019	0
0.713194	1.018	0
0.713889	1.02	0
0.714583	1.02	0
0.715278	1.019	0
0.715972	1.019	0
0.716667	1.018	0
0.717361	1.018	0
0.718056	1.018	0
0.71875	1.018	0
0.719444	1.019	0
0.720139	1.02	0
0.720833	1.021	0
0.721528	1.021	0
0.722222	1.021	0
0.722917	1.022	0
0.723611	1.022	0
0.724306	1.023	0
0.725	1.023	0
0.725694	1.024	0
0.726389	1.022	0
0.727083	1.022	0
0.727778	1.023	0
0.728472	1.023	0
0.729167	1.025	0
0.729861	1.026	0
0.730556	1.025	0
0.73125	1.026	0
0.731944	1.026	0
0.732639	1.024	0
0.733333	1.024	0
0.734028	1.023	0
0.734722	1.028	0
0.735417	1.028	0
0.736111	1.029	0
0.736806	1.029	0
0.7375	1.03	0
0.738194	1.03	0
0.738889	1.03	0
0.739583	1.028	0
0.740278	1.029	0
0.740972	1.027	0
0.741667	1.026	0
0.742361	1.029	0
0.743056	1.03	0
0.74375	1.031	0
0.744444	1.031	0
0.745139	1.033	0
0.745833	1.032	0
0.746528	1.035	0
0.747222	1.034	0
0.747917	1.034	0
0.748611	1.035	0
0.749306	1.038	0
0.75	1.038	0
0.750694	1.039	0
0.751389	1.04	0
0.752083	1.039	0
0.752778	1.039	0
0.753472	1.037	0
0.754167	1.038	0
0.754861	1.04	0
0.755556	1.039	0
0.75625	1.04	0
0.756944	1.041	0
0.757639	1.04	0
0.758333	1.041	0
0.759028	1.041	0
0.759722	1.043	0
0.760417	1.043	0
0.761111	1.042	0
0.761806	1.044	0
0.7625	1.044	0
0.763194	1.046	0
0.763889	1.05	0
0.764583	1.053	0
0.765278	1.054	0
0.765972	1.053	0
0.766667	1.054	0
0.767361	1.058	0
0.768056	1.057	0
0.76875	1.058	0
0.769444	1.057	0
0.770139	1.058	0
0.770833	1.059	0
0.771528	1.059	0
0.772222	1.058	0
0.772917	1.06	0
0.773611	1.061	0
0.774306	1.061	0
0.775	1.062	0
0.775694	1.062	0
0.776389	1.063	0
0.777083	1.064	0
0.777778	1.065	0
0.778472	1.067	0
0.779167	1.07	0
0.779861	1.07	0
0.780556	1.07	0
0.78125	1.072	0
0.781944	1.074	0
0.782639	1.074	0
0.783333	1.077	0
0.784028	1.078	0
0.784722	1.08	0
0.785417	1.079	0
0.786111	1.078	0
0.786806	1.078	0
0.7875	1.077	0
0.788194	1.077	0
0.788889	1.077	0
0.789583	1.076	0
0.790278	1.077	0
0.790972	1.077	0
0.791667	1.078	0
0.792361	1.078	0
0.793056	1.075	0
0.79375	1.075	0
0.794444	1.076	0
0.795139	1.075	0
0.795833	1.074	0
0.796528	1.074	0
0.797222	1.074	0
0.797917	1.074	0
0.798611	1.073	0
0.799306	1.073	0
0.8	1.073	0
0.800694	1.071	0
0.801389	1.072	0
0.802083	1.071	0
0.802778	1.071	0
0.803472	1.071	0
0.804167	1.071	0
0.804861	1.071	0
0.805556	1.07	0
0.80625	1.071	0
0.806944	1.071	0
0.807639	1.073	0
0.808333	1.073	0
0.809028	1.071	0
0.809722	1.073	0
0.810417	1.07	0
0.811111	1.07	0
0.811806	1.069	0
0.8125	1.069	0
0.813194	1.069	0
0.813889	1.068	0
0.814583	1.068	0
0.815278	1.07	0
0.815972	1.07	0
0.816667	1.07	0
0.817361	1.069	0
0.818056	1.07	0
0.81875	1.07	0
0.819444	1.07	0
0.820139	1.07	0
0.820833	1.07	0
0.821528	1.07	0
0.822222	1.069	0
0.822917	1.069	0
0.823611	1.069	0
0.824306	1.069	0
0.825	1.07	0
0.825694	1.07	0
0.826389	1.07	0
0.827083	1.07	0
0.827778	1.07	0
0.828472	1.069	0
0.829167	1.067	0
0.829861	1.066	0
0.830556	1.066	0
0.83125	1.066	0
0.831944	1.066	0
0.832639	1.067	0
0.833333	1.068	0
0.834028	1.069	0
0.834722	1.07	0
0.835417	1.068	0
0.836111	1.068	0
0.836806	1.07	0
0.8375	1.07	0
0.838194	1.072	0
0.838889	1.071	0
0.839583	1.071	0
0.840278	1.07	0
0.840972	1.068	0
0.841667	1.068	0
0.842361	1.067	0
0.843056	1.067	0
0.84375	1.069	0
0.844444	1.068	0
0.845139	1.07	0
0.845833	1.07	0
0.846528	1.068	0
0.847222	1.07	0
0.847917	1.07	0
0.848611	1.07	0
0.849306	1.07	0
0.85	1.07	0
0.850694	1.069	0
0.851389	1.068	0
0.852083	1.068	0
0.852778	1.069	0
0.853472	1.069	0
0.854167	1.067	0
0.854861	1.067	0
0.855556	1.068	0
0.85625	1.067	0
0.856944	1.066	0
0.857639	1.067	0
0.858333	1.067	0
0.859028	1.066	0
0.859722	1.066	0
0.860417	1.067	0
0.861111	1.068	0
0.861806	1.067	0
0.8625	1.068	0
0.863194	1.068	0
0.863889	1.07	0
0.864583	1.07	0
0.865278	1.07	0
0.865972	1.069	0
0.866667	1.068	0
0.867361	1.07	0
0.868056	1.069	0
0.86875	1.07	0
0.869444	1.068	0
0.870139	1.066	0
0.870833	1.07	0
0.871528	1.07	0
0.872222	1.068	0
0.872917	1.068	0
0.873611	1.068	0
0.874306	1.069	0
0.875	1.07	0
0.875694	1.07	0
0.876389	1.072	0
0.877083	1.072	0
0.877778	1.072	0
0.878472	1.074	0
0.879167	1.075	0
0.879861	1.074	0
0.880556	1.073	0
0.88125	1.072	0
0.881944	1.075	0
0.882639	1.074	0
0.883333	1.075	0
0.884028	1.074	0
0.884722	1.074	0
0.885417	1.074	0
0.886111	1.074	0
0.886806	1.073	0
0.8875	1.07	0
0.888194	1.072	0
0.888889	1.073	0
0.889583	1.072	0
0.890278	1.074	0
0.890972	1.074	0
0.891667	1.075	0
0.892361	1.074	0
0.893056	1.077	0
0.89375	1.077	0
0.894444	1.077	0
0.895139	1.077	0
0.895833	1.077	0
0.896528	1.077	0
0.897222	1.078	0
0.897917	1.082	0
0.898611	1.082	0
0.899306	1.081	0
0.9	1.079	0
0.900694	1.079	0
0.901389	1.079	0
0.902083	1.078	0
0.902778	1.078	0
0.903472	1.081	0
0.904167	1.081	0
0.904861	1.081	0
0.905556	1.081	0
0.90625	1.082	0
0.906944	1.083	0
0.907639	1.083	0
0.908333	1.082	0
0.909028	1.082	0
0.909722	1.082	0
0.910417	1.082	0
0.911111	1.082	0
0.911806	1.078	0
0.9125	1.078	0
0.913194	1.077	0
0.913889	1.077	0
0.914583	1.077	0
0.915278	1.077	0
0.915972	1.077	0
0.916667	1.075	0
0.917361	1.074	0
0.918056	1.074	0
0.91875	1.073	0
0.919444	1.073	0
0.920139	1.073	0
0.920833	1.073	0
0.921528	1.071	0
0.922222	1.074	0
0.922917	1.074	0
0.923611	1.074	0
0.924306	1.074	0
0.925	1.075	0
0.925694	1.075	0
0.926389	1.074	0
0.927083	1.074	0
0.927778	1.072	0
0.928472	1.07	0
0.929167	1.071	0
0.929861	1.068	0
0.930556	1.066	0
0.93125	1.067	0
0.931944	1.066	0
0.932639	1.067	0
0.933333	1.068	0
0.934028	1.066	0
0.934722	1.066	0
0.935417	1.067	0
0.936111	1.064	0
0.936806	1.066	0
0.9375	1.066	0
0.938194	1.068	0
0.938889	1.068	0
0.939583	1.07	0
0.940278	1.069	0
0.940972	1.07	0
0.941667	1.073	0
0.942361	1.072	0
0.943056	1.073	0
0.94375	1.073	0
0.944444	1.071	0
0.945139	1.073	0
0.945833	1.074	0
0.946528	1.072	0
0.947222	1.07	0
0.947917	1.07	0
0.948611	1.068	0
0.949306	1.068	0
0.95	1.068	0
0.950694	1.069	0
0.951389	1.07	0
0.952083	1.07	0
0.952778	1.071	0
0.953472	1.067	0
0.954167	1.066	0
0.954861	1.066	0
0.955556	1.065	0
0.95625	1.063	0
0.956944	1.062	0
0.957639	1.062	0
0.958333	1.062	0
0.959028	1.06	0
0.959722	1.059	0
0.960417	1.058	0
0.961111	1.059	0
0.961806	1.058	0
0.9625	1.056	0
0.963194	1.055	0
0.963889	1.057	0
0.964583	1.058	0
0.965278	1.057	0
0.965972	1.056	0
0.966667	1.055	0
0.967361	1.052	0
0.968056	1.052	0
0.96875	1.05	0
0.969444	1.05	0
0.970139	1.047	0
0.970833	1.046	0
0.971528	1.048	0
0.972222	1.048	0
0.972917	1.047	0
0.973611	1.048	0
0.974306	1.05	0
0.975	1.051	0
0.975694	1.052	0
0.976389	1.051	0
0.977083	1.053	0
0.977778	1.053	0
0.978472	1.053	0
0.979167	1.053	0
0.979861	1.052	0
0.980556	1.054	0
0.98125	1.053	0
0.981944	1.053	0
0.982639	1.051	0
0.983333	1.05	0
0.984028	1.05	0
0.984722	1.05	0
0.985417	1.052	0
0.986111	1.051	0
0.986806	1.051	0
0.9875	1.05	0
0.988194	1.05	0
0.988889	1.049	0
0.989583	1.049	0
0.990278	1.05	0
0.990972	1.048	0
0.991667	1.047	0
0.992361	1.048	0
0.993056	1.049	0
0.99375	1.05	0
0.994444	1.05	0
0.995139	1.05	0
0.995833	1.05	0
0.996528	1.051	0
0.997222	1.049	0
0.997917	1.05	0
0.998611	1.05	0
0.999306	1.05	0
1	1.05	0
1.00069	1.05	0
1.00139	1.05	0
1.00208	1.049	0
1.00278	1.049	0
1.00347	1.049	0
1.00417	1.05	0
1.00486	1.05	0
1.00556	1.05	0
1.00625	1.05	0
1.00694	1.048	0
1.00764	1.046	0
1.00833	1.046	0
1.00903	1.044	0
1.00972	1.045	0
1.01042	1.046	0
1.01111	1.045	0
1.01181	1.043	0
1.0125	1.043	0
1.01319	1.042	0
1.01389	1.038	0
1.01458	1.039	0
1.01528	1.038	0
1.01597	1.038	0
1.01667	1.04	0
1.01736	1.042	0
1.01806	1.044	0
1.01875	1.044	0
1.01944	1.041	0
1.02014	1.042	0
1.02083	1.041	0
1.02153	1.039	0
1.02222	1.043	0
1.02292	1.042	0
1.02361	1.042	0
1.02431	1.042	0
1.025	1.041	0
1.02569	1.04	0
1.02639	1.041	0
1.02708	1.04	0
1.02778	1.04	0
1.02847	1.041	0
1.02917	1.04	0
1.02986	1.038	0
1.03056	1.037	0
1.03125	1.035	0
1.03194	1.034	0
1.03264	1.035	0
1.03333	1.036	0
1.03403	1.037	0
1.03472	1.038	0
1.03542	1.038	0
1.03611	1.039	0
1.03681	1.038	0
1.0375	1.04	0
1.03819	1.041	0
1.03889	1.042	0
1.03958	1.042	0
1.04028	1.042	0
1.04097	1.043	0
1.04167	1.044	0
1.04236	1.042	0
1.04306	1.043	0
1.04375	1.041	0
1.04444	1.041	0
1.04514	1.041	0
1.04583	1.042	0
1.04653	1.042	0
1.04722	1.041	0
1.04792	1.04	0
1.04861	1.04	0
1.04931	1.04	0
1.05	1.04	0
1.05069	1.038	0
1.05139	1.038	0
1.05208	1.037	0
1.05278	1.035	0
1.05347	1.035	0
1.05417	1.035	0
1.05486	1.035	0
1.05556	1.036	0
1.05625	1.034	0
1.05694	1.034	0
1.05764	1.036	0
1.05833	1.033	0
1.05903	1.03	0
1.05972	1.026	0
1.06042	1.03	0
1.06111	1.033	0
1.06181	1.032	0
1.0625	1.031	0
1.06319	1.031	0
1.06389	1.031	0
1.06458	1.032	0
1.06528	1.033	0
1.06597	1.032	0
1.06667	1.033	0
1.06736	1.034	0
1.06806	1.033	0
1.06875	1.034	0
1.06944	1.034	0
1.07014	1.033	0
1.07083	1.033	0
1.07153	1.03	0
1.07222	1.03	0
1.07292	1.03	0
1.07361	1.03	0
1.07431	1.03	0
1.075	1.031	0
1.07569	1.032	0
1.07639	1.032	0
1.07708	1.033	0
1.07778	1.033	0
1.07847	1.031	0
1.07917	1.031	0
1.07986	1.031	0
1.08056	1.03	0
1.08125	1.03	0
1.08194	1.03	0
1.08264	1.026	0
1.08333	1.026	0
1.08403	1.026	0
1.08472	1.025	0
1.08542	1.026	0
1.08611	1.025	0
1.08681	1.025	0
1.0875	1.026	0
1.08819	1.026	0
1.08889	1.027	0
1.08958	1.026	0
1.09028	1.028	0
1.09097	1.03	0
1.09167	1.028	0
1.09236	1.027	0
1.09306	1.026	0
1.09375	1.026	0
1.09444	1.024	0
1.09514	1.022	0
1.09583	1.02	0
1.09653	1.02	0
1.09722	1.019	0
1.09792	1.018	0
1.09861	1.017	0
1.09931	1.014	0
1.1	1.014	0
1.10069	1.014	0
1.10139	1.011	0
1.10208	1.01	0
1.10278	1.008	0
1.10347	1.008	0
1.10417	1.006	0
1.10486	1.005	0
1.10556	1.006	0
1.10625	1.006	0
1.10694	1.004	0
1.10764	1.001	0
1.10833	1.002	0
1.10903	1.002	0
1.10972	1	0
1.11042	1.002	0
1.11111	1.002	0
1.11181	1.002	0
1.1125	1.002	0
1.11319	1.002	0
1.11389	1.002	0
1.11458	1.002	0
1.11528	1.001	0
1.11597	0.999	0
1.11667	1.001	0
1.11736	1.002	0
1.11806	1.001	0
1.11875	1.001	0
1.11944	1	0
1.12014	1	0
1.12083	1.001	0
1.12153	1.001	0
1.12222	1.001	0
1.12292	1	0
1.12361	0.998	0
1.12431	0.998	0
1.125	1	0
1.12569	1.001	0
1.12639	1	0
1.12708	1	0
1.12778	0.999	0
1.12847	0.998	0
1.12917	0.998	0
1.12986	0.998	0
1.13056	0.997	0
1.13125	0.996	0
1.13194	0.997	0
1.13264	0.998	0
1.13333	0.998	0
1.13403	0.998	0
1.13472	0.998	0
1.13542	0.999	0
1.13611	0.999	0
1.13681	1.001	0
1.1375	0.999	0
1.13819	1.001	0
1.13889	1.002	0
1.13958	1.002	0
1.14028	1.001	0
1.14097	1	0
1.14167	0.998	0
1.14236	0.998	0
1.14306	0.998	0
1.14375	0.995	0
1.14444	0.996	0
1.14514	0.995	0
1.14583	0.997	0
1.14653	0.995	0
1.14722	0.994	0
1.14792	0.994	0
1.14861	0.994	0
1.14931	0.992	0
1.15	0.991	0
1.15069	0.99	0
1.15139	0.985	0
1.15208	0.984	0
1.15278	0.982	0
1.15347	0.982	0
1.15417	0.982	0
1.15486	0.983	0
1.15556	0.984	0
1.15625	0.985	0
1.15694	0.983	0
1.15764	0.983	0
1.15833	0.984	0
1.15903	0.985	0
1.15972	0.984	0
1.16042	0.983	0
1.16111	0.984	0
1.16181	0.986	0
1.1625	0.983	0
1.16319	0.984	0
1.16389	0.984	0
1.16458	0.983	0
1.16528	0.981	0
1.16597	0.979	0
1.16667	0.979	0
1.16736	0.979	0
1.16806	0.976	0
1.16875	0.975	0
1.16944	0.974	0
1.17014	0.974	0
1.17083	0.974	0
1.17153	0.975	0
1.17222	0.973	0
1.17292	0.971	0
1.17361	0.97	0
1.17431	0.969	0
1.175	0.968	0
1.17569	0.968	0
1.17639	0.967	0
1.17708	0.966	0
1.17778	0.964	0
1.17847	0.963	0
1.17917	0.961	0
1.17986	0.958	0
1.18056	0.958	0
1.18125	0.958	0
1.18194	0.957	0
1.18264	0.956	0
1.18333	0.954	0
1.18403	0.954	0
1.18472	0.954	0
1.18542	0.954	0
1.18611	0.952	0
1.18681	0.952	0
1.1875	0.954	0
1.18819	0.954	0
1.18889	0.953	0
1.18958	0.953	0
1.19028	0.954	0
1.19097	0.954	0
1.19167	0.954	0
1.19236	0.951	0
1.19306	0.95	0
1.19375	0.95	0
1.19444	0.949	0
1.19514	0.949	0
1.19583	0.95	0
1.19653	0.95	0
1.19722	0.951	0
1.19792	0.951	0
1.19861	0.951	0
1.19931	0.949	0
1.2	0.949	0
1.20069	0.949	0
1.20139	0.95	0
1.20208	0.949	0
1.20278	0.95	0
1.20347	0.95	0
1.20417	0.95	0
1.20486	0.948	0
1.20556	0.948	0
1.20625	0.946	0
1.20694	0.947	0
1.20764	0.946	0
1.20833	0.945	0
1.20903	0.945	0
1.20972	0.946	0
1.21042	0.945	0
1.21111	0.944	0
1.21181	0.945	0
1.2125	0.942	0
1.21319	0.943	0
1.21389	0.943	0
1.21458	0.944	0
1.21528	0.946	0
1.21597	0.946	0
1.21667	0.945	0
1.21736	0.945	0
1.21806	0.945	0
1.21875	0.944	0
1.21944	0.944	0
1.22014	0.942	0
1.22083	0.941	0
1.22153	0.938	0
1.22222	0.937	0
1.22292	0.935	0
1.22361	0.936	0
1.22431	0.937	0
1.225	0.941	0
1.22569	0.941	0
1.22639	0.939	0
1.22708	0.938	0
1.22778	0.937	0
1.22847	0.938	0
1.22917	0.935	0
1.22986	0.934	0
1.23056	0.934	0
1.23125	0.934	0
1.23194	0.934	0
1.23264	0.934	0
1.23333	0.934	0
1.23403	0.934	0
1.23472	0.934	0
1.23542	0.934	0
1.23611	0.933	0
1.23681	0.933	0
1.2375	0.932	0
1.23819	0.93	0
1.23889	0.93	0
1.23958	0.93	0
1.24028	0.929	0
1.24097	0.929	0
1.24167	0.929	0
1.24236	0.925	0
1.24306	0.926	0
1.24375	0.927	0
1.24444	0.927	0
1.24514	0.927	0
1.24583	0.927	0
1.24653	0.926	0
1.24722	0.925	0
1.24792	0.926	0
1.24861	0.927	0
1.24931	0.928	0
1.25	0.931	0
1.25069	0.932	0
1.25139	0.931	0
1.25208	0.93	0
1.25278	0.928	0
1.25347	0.926	0
1.25417	0.924	0
1.25486	0.926	0
1.25556	0.926	0
1.25625	0.924	0
1.25694	0.924	0
1.25764	0.922	0
1.25833	0.922	0
1.25903	0.921	0
1.25972	0.921	0
1.26042	0.918	0
1.26111	0.916	0
1.26181	0.916	0
1.2625	0.917	0
1.26319	0.918	0
1.26389	0.917	0
1.26458	0.917	0
1.26528	0.916	0
1.26597	0.917	0
1.26667	0.915	0
1.26736	0.915	0
1.26806	0.912	0
1.26875	0.913	0
1.26944	0.915	0
1.27014	0.914	0
1.27083	0.913	0
1.27153	0.913	0
1.27222	0.914	0
1.27292	0.913	0
1.27361	0.911	0
1.27431	0.911	0
1.275	0.911	0
1.27569	0.914	0
1.27639	0.915	0
1.27708	0.916	0
1.27778	0.915	0
1.27847	0.916	0
1.27917	0.914	0
1.27986	0.914	0
1.28056	0.913	0
1.28125	0.912	0
1.28194	0.912	0
1.28264	0.913	0
1.28333	0.912	0
1.28403	0.914	0
1.28472	0.914	0
1.28542	0.912	0
1.28611	0.911	0
1.28681	0.913	0
1.2875	0.912	0
1.28819	0.911	0
1.28889	0.909	0
1.28958	0.908	0
1.29028	0.906	0
1.29097	0.906	0
1.29167	0.907	0
1.29236	0.907	0
1.29306	0.903	0
1.29375	0.903	0
1.29444	0.902	0
1.29514	0.903	0
1.29583	0.904	0
1.29653	0.908	0
1.29722	0.907	0
1.29792	0.904	0
1.29861	0.902	0
1.29931	0.901	0
1.3	0.902	0
1.30069	0.902	0
1.30139	0.901	0
1.30208	0.902	0
1.30278	0.9	0
1.30347	0.898	0
1.30417	0.898	0
1.30486	0.899	0
1.30556	0.901	0
1.30625	0.901	0
1.30694	0.902	0
1.30764	0.902	0
1.30833	0.906	0
1.30903	0.906	0
1.30972	0.906	0
1.31042	0.906	0
1.31111	0.905	0
1.31181	0.904	0
1.3125	0.903	0
1.31319	0.905	0
1.31389	0.905	0
1.31458	0.903	0
1.31528	0.904	0
1.31597	0.9	0
1.31667	0.9	0
1.31736	0.898	0
1.31806	0.898	0
1.31875	0.897	0
1.31944	0.898	0
1.32014	0.896	0
1.32083	0.894	0
1.32153	0.891	0
1.32222	0.893	0
1.32292	0.893	0
1.32361	0.892	0
1.32431	0.891	0
1.325	0.891	0
1.32569	0.893	0
1.32639	0.895	0
1.32708	0.894	0
1.32778	0.894	0
1.32847	0.894	0
1.32917	0.893	0
1.32986	0.894	0
1.33056	0.894	0
1.33125	0.893	0
1.33194	0.892	0
1.33264	0.89	0
1.33333	0.89	0
1.33403	0.889	0
1.33472	0.89	0
1.33542	0.888	0
1.33611	0.889	0
1.33681	0.89	0
1.3375	0.889	0
1.33819	0.888	0
1.33889	0.886	0
1.33958	0.886	0
1.34028	0.885	0
1.34097	0.884	0
1.34167	0.882	0
1.34236	0.879	0
1.34306	0.879	0
1.34375	0.879	0
1.34444	0.88	0
1.34514	0.878	0
1.34583	0.878	0
1.34653	0.879	0
1.34722	0.876	0
1.34792	0.878	0
1.34861	0.877	0
1.34931	0.874	0
1.35	0.873	0
1.35069	0.874	0
1.35139	0.871	0
1.35208	0.871	0
1.35278	0.872	0
1.35347	0.872	0
1.35417	0.872	0
1.35486	0.87	0
1.35556	0.87	0
1.35625	0.865	0
1.35694	0.864	0
1.35764	0.864	0
1.35833	0.866	0
1.35903	0.865	0
1.35972	0.866	0
1.36042	0.865	0
1.36111	0.864	0
1.36181	0.864	0
1.3625	0.865	0
1.36319	0.869	0
1.36389	0.869	0
1.36458	0.868	0
1.36528	0.87	0
1.36597	0.87	0
1.36667	0.868	0
1.36736	0.868	0
1.36806	0.866	0
1.36875	0.865	0
1.36944	0.865	0
1.37014	0.866	0
1.37083	0.869	0
1.37153	0.87	0
1.37222	0.87	0
1.37292	0.87	0
1.37361	0.869	0
1.37431	0.868	0
1.375	0.867	0
1.37569	0.866	0
1.37639	0.867	0
1.37708	0.867	0
1.37778	0.866	0
1.37847	0.868	0
1.37917	0.868	0
1.37986	0.866	0
1.38056	0.866	0
1.38125	0.866	0
1.38194	0.866	0
1.38264	0.866	0
1.38333	0.867	0
1.38403	0.863	0
1.38472	0.862	0
1.38542	0.861	0
1.38611	0.857	0
1.38681	0.857	0
1.3875	0.854	0
[truncated: 67,121 more rows]

## Sheet: Figure 4I
Data is reproduced from Figure 3F and 4H

## Sheet: Figure 5A
Time (in Hrs)	n=1	n=2/3	n=4/3	n=5/3	n=2	n=3
0	0	0	0	0	0	0
0.000694444	0	0.0008	0.0008	0	0.0008	0.002
0.00138889	0.002	0.002	0.002	0.002	0.002	0.003
0.00208333	0.003	0.003	0.004	0.003	0.002	0.005
0.00277778	0.005	0.005	0.005	0.005	0.003	0.006
0.00347222	0.006	0.008	0.006	0.006	0.003	0.009
0.00416667	0.009	0.008	0.008	0.007	0.003	0.013
0.00486111	0.01	0.009	0.01	0.008	0.006	0.014
0.00555556	0.013	0.01	0.012	0.01	0.007	0.015
0.00625	0.014	0.011	0.013	0.01	0.008	0.015
0.00694444	0.015	0.012	0.017	0.01	0.009	0.015
0.00763889	0.015	0.014	0.018	0.014	0.01	0.016
0.00833333	0.016	0.017	0.02	0.014	0.01	0.017
0.00902778	0.018	0.018	0.022	0.015	0.012	0.018
0.00972222	0.02	0.018	0.025	0.017	0.014	0.021
0.0104167	0.022	0.021	0.026	0.018	0.015	0.026
0.0111111	0.022	0.022	0.028	0.022	0.018	0.027
0.0118056	0.022	0.025	0.029	0.024	0.023	0.03
0.0125	0.024	0.026	0.03	0.026	0.025	0.031
0.0131944	0.026	0.027	0.03	0.029	0.025	0.031
0.0138889	0.029	0.03	0.03	0.031	0.026	0.032
0.0145833	0.03	0.034	0.031	0.033	0.026	0.032
0.0152778	0.031	0.034	0.032	0.034	0.027	0.032
0.0159722	0.035	0.034	0.035	0.036	0.028	0.033
0.0166667	0.037	0.034	0.036	0.038	0.03	0.034
0.0173611	0.038	0.036	0.038	0.039	0.03	0.037
0.0180556	0.038	0.038	0.042	0.042	0.03	0.038
0.01875	0.038	0.038	0.042	0.045	0.032	0.04
0.0194444	0.038	0.039	0.042	0.047	0.034	0.042
0.0201389	0.039	0.042	0.042	0.047	0.036	0.043
0.0208333	0.039	0.043	0.045	0.049	0.039	0.043
0.0215278	0.04	0.045	0.048	0.051	0.041	0.046
0.0222222	0.042	0.046	0.049	0.054	0.042	0.048
0.0229167	0.042	0.046	0.052	0.058	0.043	0.05
0.0236111	0.044	0.047	0.054	0.059	0.044	0.051
0.0243056	0.045	0.052	0.054	0.059	0.044	0.054
0.025	0.048	0.054	0.055	0.062	0.046	0.055
0.0256944	0.05	0.056	0.057	0.063	0.049	0.056
0.0263889	0.053	0.057	0.059	0.066	0.05	0.057
0.0270833	0.054	0.058	0.061	0.066	0.052	0.058
0.0277778	0.056	0.061	0.062	0.067	0.054	0.059
0.0284722	0.058	0.061	0.063	0.07	0.054	0.06
0.0291667	0.062	0.065	0.065	0.073	0.055	0.062
0.0298611	0.062	0.067	0.067	0.075	0.058	0.063
0.0305556	0.064	0.068	0.068	0.077	0.058	0.064
0.03125	0.065	0.07	0.068	0.078	0.058	0.066
0.0319444	0.065	0.071	0.069	0.078	0.06	0.07
0.0326389	0.067	0.072	0.069	0.08	0.062	0.073
0.0333333	0.069	0.072	0.069	0.082	0.063	0.074
0.0340278	0.07	0.074	0.07	0.083	0.064	0.074
0.0347222	0.071	0.074	0.07	0.084	0.066	0.076
0.0354167	0.074	0.075	0.072	0.085	0.066	0.078
0.0361111	0.075	0.078	0.073	0.086	0.067	0.079
0.0368056	0.076	0.079	0.074	0.086	0.068	0.081
0.0375	0.078	0.08	0.075	0.088	0.07	0.083
0.0381944	0.081	0.081	0.076	0.089	0.072	0.085
0.0388889	0.082	0.082	0.076	0.091	0.074	0.086
0.0395833	0.083	0.082	0.079	0.093	0.077	0.088
0.0402778	0.085	0.085	0.079	0.094	0.078	0.088
0.0409722	0.086	0.086	0.079	0.094	0.079	0.091
0.0416667	0.088	0.087	0.082	0.098	0.079	0.094
0.0423611	0.09	0.09	0.082	0.098	0.082	0.094
0.0430556	0.091	0.093	0.084	0.101	0.083	0.096
0.04375	0.093	0.094	0.087	0.102	0.085	0.098
0.0444444	0.094	0.097	0.09	0.105	0.086	0.098
0.0451389	0.097	0.098	0.09	0.106	0.086	0.098
0.0458333	0.099	0.101	0.091	0.107	0.087	0.099
0.0465278	0.102	0.102	0.093	0.108	0.091	0.101
0.0472222	0.102	0.106	0.093	0.109	0.094	0.102
0.0479167	0.102	0.107	0.095	0.11	0.096	0.102
0.0486111	0.104	0.11	0.096	0.111	0.097	0.104
0.0493056	0.106	0.111	0.097	0.113	0.098	0.108
0.05	0.108	0.113	0.099	0.113	0.098	0.108
0.0506944	0.11	0.114	0.099	0.114	0.099	0.11
0.0513889	0.112	0.114	0.101	0.116	0.1	0.112
0.0520833	0.114	0.115	0.103	0.12	0.102	0.115
0.0527778	0.115	0.116	0.103	0.123	0.102	0.119
0.0534722	0.116	0.117	0.105	0.123	0.104	0.12
0.0541667	0.117	0.118	0.107	0.125	0.105	0.122
0.0548611	0.118	0.119	0.108	0.126	0.106	0.123
0.0555556	0.119	0.12	0.108	0.127	0.106	0.124
0.05625	0.122	0.121	0.108	0.128	0.107	0.125
0.0569444	0.123	0.122	0.108	0.13	0.109	0.126
0.0576389	0.127	0.123	0.11	0.13	0.109	0.126
0.0583333	0.13	0.124	0.111	0.13	0.11	0.127
0.0590278	0.13	0.125	0.111	0.13	0.114	0.127
0.0597222	0.13	0.126	0.113	0.13	0.114	0.128
0.0604167	0.132	0.128	0.114	0.132	0.116	0.13
0.0611111	0.134	0.13	0.116	0.134	0.116	0.13
0.0618056	0.136	0.131	0.116	0.134	0.117	0.132
0.0625	0.136	0.134	0.118	0.136	0.119	0.134
0.0631944	0.141	0.136	0.118	0.138	0.121	0.136
0.0638889	0.143	0.138	0.119	0.139	0.121	0.138
0.0645833	0.144	0.141	0.12	0.142	0.121	0.138
0.0652778	0.145	0.142	0.121	0.142	0.124	0.139
0.0659722	0.145	0.146	0.123	0.142	0.124	0.141
0.0666667	0.145	0.146	0.125	0.143	0.126	0.145
0.0673611	0.146	0.147	0.127	0.144	0.126	0.149
0.0680556	0.149	0.148	0.128	0.144	0.13	0.149
0.06875	0.153	0.15	0.13	0.144	0.13	0.151
0.0694444	0.154	0.15	0.13	0.146	0.131	0.154
0.0701389	0.156	0.152	0.13	0.146	0.132	0.156
0.0708333	0.158	0.153	0.133	0.148	0.132	0.158
0.0715278	0.162	0.153	0.137	0.15	0.132	0.158
0.0722222	0.164	0.153	0.138	0.15	0.132	0.16
0.0729167	0.165	0.154	0.141	0.15	0.133	0.163
0.0736111	0.168	0.157	0.145	0.15	0.134	0.164
0.0743056	0.17	0.158	0.146	0.15	0.134	0.164
0.075	0.17	0.159	0.146	0.153	0.136	0.164
0.0756944	0.17	0.159	0.15	0.154	0.138	0.165
0.0763889	0.172	0.16	0.151	0.156	0.14	0.166
0.0770833	0.174	0.161	0.152	0.158	0.14	0.167
0.0777778	0.174	0.162	0.154	0.159	0.141	0.17
0.0784722	0.175	0.166	0.158	0.16	0.141	0.171
0.0791667	0.177	0.167	0.16	0.161	0.142	0.172
0.0798611	0.178	0.168	0.161	0.162	0.144	0.178
0.0805556	0.179	0.171	0.164	0.163	0.146	0.18
0.08125	0.18	0.171	0.165	0.165	0.15	0.18
0.0819444	0.18	0.174	0.167	0.165	0.151	0.182
0.0826389	0.18	0.174	0.169	0.166	0.153	0.184
0.0833333	0.182	0.174	0.17	0.166	0.154	0.186
0.0840278	0.183	0.176	0.171	0.166	0.156	0.186
0.0847222	0.184	0.176	0.171	0.168	0.156	0.189
0.0854167	0.187	0.176	0.172	0.168	0.156	0.191
0.0861111	0.189	0.177	0.172	0.168	0.157	0.194
0.0868056	0.19	0.177	0.172	0.173	0.157	0.195
0.0875	0.191	0.178	0.174	0.174	0.158	0.196
0.0881944	0.191	0.178	0.176	0.174	0.161	0.198
0.0888889	0.193	0.18	0.178	0.178	0.164	0.202
0.0895833	0.194	0.18	0.178	0.178	0.166	0.203
0.0902778	0.194	0.183	0.178	0.178	0.168	0.207
0.0909722	0.197	0.186	0.181	0.178	0.169	0.21
0.0916667	0.198	0.186	0.182	0.181	0.171	0.211
0.0923611	0.199	0.186	0.184	0.182	0.171	0.214
0.0930556	0.202	0.187	0.186	0.182	0.172	0.215
0.09375	0.205	0.191	0.188	0.183	0.175	0.216
0.0944444	0.206	0.192	0.189	0.185	0.178	0.218
0.0951389	0.206	0.194	0.191	0.189	0.178	0.221
0.0958333	0.206	0.194	0.191	0.189	0.18	0.222
0.0965278	0.207	0.195	0.193	0.19	0.18	0.223
0.0972222	0.21	0.196	0.193	0.19	0.183	0.225
0.0979167	0.211	0.196	0.195	0.192	0.184	0.228
0.0986111	0.213	0.2	0.195	0.194	0.185	0.229
0.0993056	0.217	0.201	0.197	0.197	0.186	0.23
0.1	0.218	0.201	0.197	0.198	0.189	0.232
0.100694	0.218	0.202	0.198	0.198	0.19	0.234
0.101389	0.221	0.204	0.201	0.201	0.192	0.234
0.102083	0.222	0.207	0.202	0.202	0.194	0.234
0.102778	0.222	0.209	0.203	0.202	0.194	0.234
0.103472	0.222	0.209	0.204	0.204	0.195	0.235
0.104167	0.222	0.209	0.205	0.204	0.195	0.236
0.104861	0.225	0.21	0.206	0.206	0.196	0.237
0.105556	0.225	0.211	0.206	0.207	0.197	0.238
0.10625	0.227	0.213	0.208	0.209	0.198	0.238
0.106944	0.23	0.213	0.209	0.21	0.198	0.238
0.107639	0.23	0.214	0.211	0.211	0.199	0.24
0.108333	0.232	0.214	0.212	0.211	0.201	0.24
0.109028	0.233	0.216	0.213	0.213	0.202	0.241
0.109722	0.235	0.218	0.214	0.214	0.204	0.243
0.110417	0.235	0.221	0.214	0.214	0.205	0.243
0.111111	0.236	0.223	0.216	0.215	0.206	0.246
0.111806	0.237	0.225	0.217	0.216	0.208	0.246
0.1125	0.238	0.226	0.218	0.217	0.209	0.247
0.113194	0.24	0.227	0.218	0.218	0.211	0.248
0.113889	0.24	0.228	0.22	0.218	0.214	0.248
0.114583	0.242	0.229	0.225	0.219	0.216	0.249
0.115278	0.243	0.23	0.225	0.22	0.217	0.25
0.115972	0.245	0.23	0.227	0.223	0.22	0.25
0.116667	0.246	0.23	0.23	0.224	0.224	0.25
0.117361	0.247	0.23	0.231	0.225	0.224	0.25
0.118056	0.248	0.231	0.233	0.226	0.225	0.25
0.11875	0.249	0.233	0.234	0.226	0.226	0.252
0.119444	0.25	0.234	0.237	0.228	0.227	0.254
0.120139	0.25	0.235	0.238	0.23	0.228	0.257
0.120833	0.253	0.236	0.238	0.23	0.23	0.257
0.121528	0.253	0.237	0.238	0.232	0.231	0.258
0.122222	0.254	0.237	0.24	0.233	0.232	0.259
0.122917	0.254	0.24	0.242	0.234	0.233	0.26
0.123611	0.254	0.242	0.242	0.236	0.234	0.26
0.124306	0.256	0.242	0.242	0.238	0.236	0.26
0.125	0.258	0.244	0.244	0.242	0.236	0.262
0.125694	0.258	0.246	0.246	0.242	0.236	0.262
0.126389	0.258	0.246	0.246	0.245	0.237	0.262
0.127083	0.259	0.246	0.25	0.246	0.24	0.262
0.127778	0.261	0.25	0.252	0.246	0.242	0.262
0.128472	0.265	0.252	0.254	0.246	0.245	0.263
0.129167	0.267	0.254	0.256	0.249	0.245	0.269
0.129861	0.27	0.258	0.257	0.25	0.247	0.27
0.130556	0.27	0.258	0.257	0.25	0.248	0.274
0.13125	0.271	0.261	0.258	0.254	0.249	0.276
0.131944	0.273	0.262	0.258	0.254	0.249	0.278
0.132639	0.274	0.262	0.259	0.256	0.25	0.282
0.133333	0.276	0.264	0.261	0.256	0.25	0.282
0.134028	0.278	0.264	0.263	0.256	0.252	0.283
0.134722	0.278	0.265	0.263	0.257	0.252	0.285
0.135417	0.28	0.268	0.265	0.258	0.252	0.286
0.136111	0.282	0.268	0.266	0.26	0.252	0.287
0.136806	0.282	0.27	0.268	0.261	0.254	0.288
0.1375	0.285	0.271	0.268	0.262	0.254	0.291
0.138194	0.287	0.27	0.271	0.265	0.256	0.294
0.138889	0.29	0.272	0.272	0.268	0.257	0.294
0.139583	0.294	0.274	0.272	0.27	0.257	0.294
0.140278	0.298	0.275	0.274	0.27	0.259	0.295
0.140972	0.298	0.278	0.277	0.272	0.26	0.296
0.141667	0.3	0.28	0.277	0.273	0.26	0.297
0.142361	0.3	0.282	0.278	0.273	0.26	0.298
0.143056	0.302	0.284	0.28	0.274	0.262	0.298
0.14375	0.306	0.284	0.281	0.275	0.264	0.302
0.144444	0.307	0.284	0.283	0.275	0.265	0.302
0.145139	0.308	0.286	0.288	0.275	0.266	0.304
0.145833	0.308	0.288	0.29	0.276	0.267	0.306
0.146528	0.31	0.29	0.291	0.28	0.268	0.308
0.147222	0.31	0.291	0.291	0.282	0.27	0.31
0.147917	0.311	0.29	0.292	0.283	0.27	0.311
0.148611	0.314	0.292	0.294	0.284	0.272	0.313
0.149306	0.317	0.294	0.294	0.284	0.273	0.314
0.15	0.321	0.298	0.295	0.286	0.274	0.315
0.150694	0.322	0.299	0.298	0.287	0.277	0.317
0.151389	0.322	0.3	0.298	0.287	0.28	0.318
0.152083	0.323	0.302	0.299	0.289	0.282	0.319
0.152778	0.328	0.305	0.301	0.29	0.282	0.319
0.153472	0.33	0.306	0.302	0.29	0.282	0.32
0.154167	0.331	0.307	0.302	0.292	0.282	0.321
0.154861	0.331	0.309	0.303	0.292	0.284	0.322
0.155556	0.334	0.309	0.305	0.295	0.284	0.323
0.15625	0.335	0.309	0.307	0.295	0.284	0.323
0.156944	0.338	0.309	0.308	0.298	0.284	0.324
0.157639	0.34	0.314	0.31	0.299	0.284	0.327
0.158333	0.341	0.317	0.31	0.302	0.284	0.328
0.159028	0.341	0.318	0.31	0.304	0.286	0.33
0.159722	0.341	0.32	0.31	0.305	0.286	0.33
0.160417	0.342	0.321	0.311	0.306	0.286	0.331
0.161111	0.343	0.323	0.313	0.306	0.287	0.334
0.161806	0.345	0.323	0.314	0.308	0.287	0.334
0.1625	0.347	0.323	0.314	0.312	0.287	0.338
0.163194	0.348	0.323	0.314	0.314	0.29	0.34
0.163889	0.348	0.325	0.315	0.316	0.29	0.342
0.164583	0.35	0.327	0.317	0.318	0.292	0.343
0.165278	0.351	0.33	0.317	0.318	0.298	0.343
0.165972	0.354	0.33	0.318	0.321	0.298	0.346
0.166667	0.354	0.33	0.321	0.321	0.299	0.349
0.167361	0.357	0.331	0.321	0.321	0.301	0.35
0.168056	0.357	0.334	0.322	0.322	0.302	0.35
0.16875	0.358	0.335	0.322	0.322	0.303	0.353
0.169444	0.358	0.335	0.324	0.322	0.303	0.354
0.170139	0.358	0.337	0.325	0.326	0.305	0.354
0.170833	0.358	0.337	0.326	0.326	0.306	0.355
0.171528	0.364	0.338	0.327	0.326	0.307	0.358
0.172222	0.366	0.34	0.331	0.327	0.31	0.362
0.172917	0.369	0.339	0.333	0.328	0.311	0.363
0.173611	0.369	0.34	0.333	0.329	0.313	0.363
0.174306	0.369	0.342	0.333	0.33	0.314	0.364
0.175	0.37	0.342	0.334	0.334	0.315	0.364
0.175694	0.37	0.342	0.336	0.335	0.316	0.365
0.176389	0.372	0.342	0.338	0.337	0.319	0.365
0.177083	0.372	0.343	0.339	0.339	0.319	0.365
0.177778	0.374	0.345	0.342	0.341	0.32	0.366
0.178472	0.374	0.346	0.342	0.343	0.323	0.366
0.179167	0.377	0.346	0.342	0.345	0.326	0.368
0.179861	0.378	0.348	0.344	0.346	0.326	0.369
0.180556	0.379	0.35	0.346	0.346	0.326	0.37
0.18125	0.379	0.35	0.348	0.347	0.33	0.37
0.181944	0.38	0.352	0.35	0.347	0.33	0.372
0.182639	0.382	0.355	0.35	0.349	0.331	0.375
0.183333	0.382	0.358	0.35	0.35	0.332	0.376
0.184028	0.383	0.36	0.35	0.351	0.333	0.377
0.184722	0.384	0.36	0.352	0.352	0.333	0.378
0.185417	0.386	0.36	0.356	0.352	0.334	0.378
0.186111	0.387	0.359	0.358	0.353	0.335	0.378
0.186806	0.389	0.362	0.361	0.354	0.338	0.38
0.1875	0.389	0.363	0.362	0.355	0.339	0.382
0.188194	0.389	0.365	0.364	0.358	0.34	0.383
0.188889	0.39	0.366	0.366	0.358	0.343	0.384
0.189583	0.393	0.366	0.366	0.362	0.344	0.384
0.190278	0.394	0.369	0.366	0.362	0.346	0.385
0.190972	0.396	0.37	0.368	0.366	0.349	0.385
0.191667	0.396	0.37	0.37	0.369	0.35	0.386
0.192361	0.398	0.369	0.374	0.371	0.352	0.389
0.193056	0.398	0.37	0.374	0.373	0.355	0.39
0.19375	0.4	0.37	0.374	0.374	0.356	0.392
0.194444	0.401	0.37	0.375	0.374	0.357	0.394
0.195139	0.402	0.371	0.378	0.374	0.358	0.395
0.195833	0.404	0.37	0.379	0.375	0.359	0.395
0.196528	0.405	0.37	0.38	0.376	0.362	0.396
0.197222	0.406	0.371	0.382	0.377	0.363	0.398
0.197917	0.406	0.372	0.382	0.379	0.365	0.4
0.198611	0.407	0.374	0.385	0.379	0.366	0.401
0.199306	0.408	0.375	0.385	0.381	0.369	0.401
0.2	0.41	0.374	0.386	0.381	0.37	0.401
0.200694	0.41	0.375	0.386	0.382	0.372	0.402
0.201389	0.41	0.376	0.39	0.382	0.373	0.402
0.202083	0.41	0.378	0.39	0.382	0.374	0.404
0.202778	0.411	0.382	0.39	0.383	0.375	0.404
0.203472	0.411	0.382	0.39	0.383	0.376	0.405
0.204167	0.412	0.382	0.392	0.388	0.376	0.405
0.204861	0.415	0.383	0.395	0.388	0.377	0.407
0.205556	0.418	0.384	0.398	0.388	0.377	0.408
0.20625	0.418	0.385	0.4	0.39	0.378	0.41
0.206944	0.419	0.386	0.402	0.394	0.379	0.41
0.207639	0.419	0.388	0.405	0.394	0.381	0.412
0.208333	0.424	0.391	0.409	0.394	0.382	0.413
0.209028	0.428	0.395	0.412	0.394	0.383	0.413
0.209722	0.43	0.396	0.413	0.397	0.385	0.413
0.210417	0.431	0.396	0.414	0.397	0.385	0.414
0.211111	0.431	0.398	0.415	0.398	0.386	0.414
0.211806	0.433	0.399	0.417	0.399	0.387	0.415
0.2125	0.434	0.401	0.418	0.4	0.39	0.418
0.213194	0.434	0.402	0.419	0.401	0.39	0.419
0.213889	0.434	0.403	0.421	0.401	0.392	0.42
0.214583	0.438	0.404	0.422	0.402	0.393	0.422
0.215278	0.438	0.404	0.424	0.403	0.396	0.425
0.215972	0.438	0.405	0.425	0.404	0.396	0.426
0.216667	0.439	0.406	0.426	0.405	0.398	0.428
0.217361	0.44	0.406	0.428	0.407	0.4	0.43
0.218056	0.44	0.407	0.43	0.409	0.4	0.43
0.21875	0.442	0.409	0.43	0.41	0.402	0.43
0.219444	0.442	0.411	0.431	0.41	0.405	0.43
0.220139	0.444	0.413	0.432	0.412	0.406	0.431
0.220833	0.446	0.414	0.434	0.414	0.407	0.434
0.221528	0.446	0.416	0.434	0.416	0.409	0.434
0.222222	0.449	0.417	0.436	0.417	0.41	0.435
0.222917	0.449	0.418	0.438	0.418	0.41	0.44
0.223611	0.449	0.418	0.439	0.418	0.411	0.441
0.224306	0.45	0.418	0.442	0.419	0.414	0.443
0.225	0.45	0.422	0.442	0.42	0.414	0.444
0.225694	0.451	0.423	0.443	0.421	0.414	0.445
0.226389	0.451	0.425	0.445	0.422	0.416	0.447
0.227083	0.452	0.426	0.447	0.423	0.419	0.448
0.227778	0.453	0.429	0.45	0.425	0.419	0.449
0.228472	0.454	0.429	0.45	0.426	0.421	0.449
0.229167	0.454	0.427	0.453	0.427	0.421	0.45
0.229861	0.455	0.428	0.454	0.428	0.422	0.45
0.230556	0.456	0.429	0.454	0.428	0.423	0.452
0.23125	0.456	0.43	0.457	0.43	0.423	0.453
0.231944	0.457	0.43	0.458	0.433	0.425	0.453
0.232639	0.458	0.431	0.461	0.435	0.429	0.454
0.233333	0.458	0.433	0.464	0.435	0.43	0.456
0.234028	0.46	0.433	0.464	0.437	0.431	0.458
0.234722	0.461	0.433	0.466	0.438	0.435	0.458
0.235417	0.461	0.433	0.466	0.438	0.437	0.459
0.236111	0.462	0.434	0.467	0.439	0.437	0.46
0.236806	0.463	0.434	0.47	0.44	0.438	0.462
0.2375	0.464	0.434	0.47	0.44	0.44	0.462
0.238194	0.464	0.434	0.47	0.44	0.441	0.463
0.238889	0.465	0.434	0.471	0.441	0.442	0.463
0.239583	0.465	0.435	0.472	0.442	0.443	0.464
0.240278	0.465	0.435	0.473	0.443	0.443	0.464
0.240972	0.465	0.434	0.474	0.444	0.445	0.465
0.241667	0.466	0.433	0.475	0.446	0.446	0.465
0.242361	0.466	0.433	0.477	0.447	0.446	0.465
0.243056	0.466	0.435	0.478	0.448	0.446	0.466
0.24375	0.469	0.436	0.478	0.449	0.447	0.467
0.244444	0.469	0.435	0.482	0.449	0.449	0.468
0.245139	0.47	0.434	0.482	0.452	0.45	0.47
0.245833	0.475	0.434	0.482	0.456	0.45	0.47
0.246528	0.475	0.434	0.486	0.456	0.451	0.471
0.247222	0.476	0.434	0.488	0.457	0.454	0.474
0.247917	0.478	0.434	0.489	0.458	0.454	0.474
0.248611	0.48	0.436	0.493	0.459	0.458	0.474
0.249306	0.481	0.438	0.494	0.46	0.458	0.476
0.25	0.482	0.439	0.494	0.462	0.46	0.476
0.250694	0.483	0.441	0.495	0.464	0.462	0.477
0.251389	0.484	0.442	0.498	0.465	0.466	0.478
0.252083	0.486	0.442	0.498	0.465	0.466	0.479
0.252778	0.486	0.442	0.502	0.465	0.467	0.48
0.253472	0.488	0.442	0.503	0.465	0.469	0.481
0.254167	0.489	0.444	0.505	0.466	0.47	0.482
0.254861	0.49	0.446	0.506	0.468	0.472	0.483
0.255556	0.492	0.447	0.507	0.469	0.472	0.485
0.25625	0.494	0.448	0.508	0.471	0.474	0.485
0.256944	0.494	0.448	0.509	0.472	0.476	0.487
0.257639	0.494	0.45	0.51	0.472	0.478	0.489
0.258333	0.495	0.45	0.51	0.473	0.479	0.489
0.259028	0.498	0.453	0.512	0.473	0.48	0.49
0.259722	0.499	0.45	0.514	0.474	0.482	0.49
0.260417	0.5	0.45	0.516	0.474	0.482	0.491
0.261111	0.501	0.45	0.518	0.477	0.484	0.492
0.261806	0.501	0.45	0.518	0.478	0.487	0.494
0.2625	0.501	0.45	0.518	0.482	0.49	0.494
0.263194	0.502	0.452	0.519	0.482	0.49	0.495
0.263889	0.502	0.452	0.52	0.482	0.49	0.496
0.264583	0.504	0.452	0.522	0.484	0.49	0.497
0.265278	0.504	0.45	0.524	0.485	0.49	0.498
0.265972	0.506	0.45	0.526	0.486	0.493	0.498
0.266667	0.507	0.45	0.526	0.488	0.495	0.5
0.267361	0.508	0.45	0.526	0.492	0.495	0.502
0.268056	0.512	0.453	0.527	0.494	0.495	0.503
0.26875	0.514	0.453	0.528	0.494	0.498	0.505
0.269444	0.515	0.453	0.53	0.495	0.498	0.506
0.270139	0.516	0.454	0.533	0.496	0.5	0.506
0.270833	0.516	0.456	0.534	0.498	0.502	0.508
0.271528	0.519	0.458	0.535	0.499	0.502	0.508
0.272222	0.52	0.461	0.537	0.499	0.505	0.508
0.272917	0.521	0.46	0.539	0.5	0.506	0.509
0.273611	0.521	0.46	0.54	0.502	0.506	0.51
0.274306	0.523	0.459	0.543	0.502	0.507	0.511
0.275	0.525	0.459	0.544	0.505	0.508	0.513
0.275694	0.528	0.458	0.544	0.507	0.51	0.514
0.276389	0.529	0.458	0.546	0.51	0.51	0.515
0.277083	0.53	0.458	0.548	0.513	0.512	0.515
0.277778	0.535	0.455	0.55	0.514	0.514	0.517
0.278472	0.538	0.454	0.55	0.514	0.516	0.517
0.279167	0.539	0.452	0.552	0.516	0.516	0.52
0.279861	0.54	0.452	0.553	0.518	0.517	0.522
0.280556	0.542	0.452	0.554	0.518	0.517	0.522
0.28125	0.542	0.451	0.554	0.518	0.518	0.522
0.281944	0.546	0.45	0.555	0.52	0.518	0.525
0.282639	0.546	0.45	0.555	0.521	0.52	0.527
0.283333	0.547	0.45	0.555	0.521	0.522	0.527
0.284028	0.549	0.45	0.555	0.521	0.523	0.527
0.284722	0.55	0.451	0.556	0.521	0.523	0.529
0.285417	0.55	0.45	0.558	0.522	0.524	0.53
0.286111	0.55	0.451	0.56	0.522	0.527	0.532
0.286806	0.55	0.453	0.562	0.526	0.528	0.533
0.2875	0.551	0.453	0.563	0.528	0.528	0.535
0.288194	0.552	0.453	0.565	0.529	0.528	0.536
0.288889	0.554	0.453	0.567	0.53	0.529	0.538
0.289583	0.555	0.455	0.568	0.53	0.53	0.538
0.290278	0.557	0.455	0.569	0.53	0.531	0.539
0.290972	0.558	0.457	0.569	0.532	0.531	0.54
0.291667	0.558	0.454	0.572	0.533	0.533	0.542
0.292361	0.559	0.454	0.573	0.534	0.534	0.542
0.293056	0.56	0.454	0.575	0.534	0.534	0.542
0.29375	0.56	0.454	0.578	0.535	0.534	0.542
0.294444	0.56	0.456	0.579	0.538	0.534	0.543
0.295139	0.562	0.457	0.579	0.538	0.538	0.546
0.295833	0.562	0.459	0.579	0.54	0.539	0.548
0.296528	0.563	0.459	0.579	0.541	0.542	0.55
0.297222	0.563	0.459	0.58	0.541	0.542	0.55
0.297917	0.566	0.46	0.581	0.542	0.546	0.553
0.298611	0.567	0.462	0.583	0.542	0.546	0.554
0.299306	0.569	0.462	0.585	0.543	0.546	0.554
0.3	0.57	0.462	0.586	0.543	0.546	0.555
0.300694	0.57	0.462	0.587	0.543	0.549	0.557
0.301389	0.57	0.46	0.589	0.545	0.551	0.557
0.302083	0.571	0.46	0.592	0.546	0.552	0.557
0.302778	0.571	0.461	0.594	0.546	0.552	0.562
0.303472	0.573	0.462	0.594	0.546	0.554	0.562
0.304167	0.574	0.462	0.595	0.549	0.557	0.565
0.304861	0.574	0.461	0.596	0.55	0.559	0.566
0.305556	0.574	0.458	0.599	0.551	0.561	0.566
0.30625	0.574	0.458	0.602	0.552	0.562	0.566
0.306944	0.574	0.459	0.602	0.553	0.563	0.569
0.307639	0.575	0.458	0.605	0.554	0.564	0.571
0.308333	0.577	0.457	0.605	0.556	0.567	0.571
0.309028	0.578	0.456	0.606	0.556	0.569	0.572
0.309722	0.578	0.457	0.608	0.557	0.57	0.574
0.310417	0.579	0.459	0.609	0.558	0.57	0.574
0.311111	0.582	0.46	0.61	0.558	0.57	0.576
0.311806	0.582	0.462	0.61	0.56	0.571	0.578
0.3125	0.583	0.463	0.611	0.561	0.571	0.578
0.313194	0.586	0.463	0.613	0.561	0.572	0.581
0.313889	0.59	0.462	0.614	0.562	0.574	0.581
0.314583	0.592	0.462	0.615	0.563	0.575	0.581
0.315278	0.594	0.461	0.615	0.563	0.576	0.583
0.315972	0.594	0.464	0.615	0.563	0.578	0.586
0.316667	0.594	0.462	0.616	0.563	0.579	0.586
0.317361	0.595	0.462	0.616	0.564	0.581	0.586
0.318056	0.596	0.462	0.617	0.566	0.584	0.586
0.31875	0.597	0.461	0.617	0.566	0.585	0.587
0.319444	0.598	0.461	0.617	0.566	0.586	0.588
0.320139	0.599	0.461	0.618	0.568	0.586	0.589
0.320833	0.601	0.46	0.619	0.569	0.589	0.59
0.321528	0.602	0.46	0.622	0.57	0.59	0.592
0.322222	0.603	0.462	0.622	0.57	0.592	0.594
0.322917	0.605	0.462	0.622	0.57	0.594	0.595
0.323611	0.605	0.462	0.622	0.571	0.596	0.597
0.324306	0.606	0.459	0.625	0.574	0.599	0.599
0.325	0.606	0.458	0.626	0.574	0.602	0.601
0.325694	0.606	0.458	0.626	0.576	0.602	0.602
0.326389	0.607	0.458	0.626	0.576	0.603	0.605
0.327083	0.609	0.459	0.627	0.577	0.605	0.606
0.327778	0.61	0.459	0.629	0.578	0.606	0.606
0.328472	0.611	0.458	0.63	0.581	0.606	0.606
0.329167	0.611	0.458	0.632	0.584	0.607	0.608
0.329861	0.611	0.458	0.634	0.584	0.61	0.61
0.330556	0.613	0.458	0.634	0.584	0.61	0.61
0.33125	0.615	0.458	0.637	0.585	0.614	0.611
0.331944	0.617	0.459	0.637	0.588	0.614	0.611
0.332639	0.618	0.459	0.638	0.59	0.615	0.613
0.333333	0.621	0.458	0.638	0.591	0.617	0.614
0.334028	0.621	0.457	0.64	0.591	0.618	0.615
0.334722	0.623	0.456	0.64	0.591	0.618	0.616
0.335417	0.622	0.456	0.642	0.593	0.622	0.618
0.336111	0.623	0.455	0.643	0.594	0.622	0.619
0.336806	0.624	0.456	0.644	0.594	0.622	0.621
0.3375	0.626	0.455	0.645	0.598	0.622	0.622
0.338194	0.626	0.454	0.648	0.599	0.622	0.624
0.338889	0.627	0.453	0.649	0.6	0.623	0.626
0.339583	0.627	0.453	0.65	0.602	0.627	0.627
0.340278	0.628	0.451	0.651	0.602	0.628	0.628
0.340972	0.631	0.451	0.651	0.602	0.629	0.63
0.341667	0.632	0.452	0.654	0.604	0.63	0.632
0.342361	0.634	0.45	0.654	0.604	0.632	0.633
0.343056	0.634	0.45	0.655	0.606	0.632	0.633
0.34375	0.635	0.449	0.655	0.606	0.634	0.635
0.344444	0.635	0.446	0.657	0.606	0.634	0.636
0.345139	0.636	0.447	0.657	0.608	0.636	0.636
0.345833	0.636	0.448	0.657	0.61	0.637	0.638
0.346528	0.636	0.448	0.657	0.61	0.637	0.638
0.347222	0.636	0.449	0.659	0.612	0.638	0.639
0.347917	0.637	0.45	0.66	0.614	0.638	0.641
0.348611	0.638	0.453	0.663	0.614	0.64	0.642
0.349306	0.639	0.452	0.664	0.614	0.642	0.642
0.35	0.64	0.45	0.664	0.616	0.642	0.645
0.350694	0.642	0.45	0.665	0.618	0.643	0.646
0.351389	0.643	0.45	0.665	0.62	0.646	0.648
0.352083	0.646	0.449	0.666	0.62	0.646	0.653
0.352778	0.647	0.45	0.667	0.621	0.649	0.654
0.353472	0.647	0.45	0.668	0.622	0.65	0.656
0.354167	0.649	0.448	0.67	0.622	0.652	0.656
0.354861	0.648	0.45	0.671	0.624	0.654	0.656
0.355556	0.649	0.449	0.672	0.626	0.657	0.658
0.35625	0.65	0.45	0.673	0.627	0.658	0.661
0.356944	0.65	0.45	0.674	0.628	0.659	0.662
0.357639	0.651	0.448	0.675	0.63	0.661	0.662
0.358333	0.652	0.446	0.676	0.632	0.662	0.662
0.359028	0.655	0.445	0.678	0.633	0.662	0.664
0.359722	0.656	0.446	0.679	0.634	0.663	0.666
0.360417	0.657	0.444	0.68	0.636	0.664	0.667
0.361111	0.658	0.444	0.681	0.638	0.665	0.667
0.361806	0.66	0.444	0.681	0.639	0.665	0.668
0.3625	0.662	0.442	0.682	0.641	0.666	0.668
0.363194	0.662	0.445	0.682	0.642	0.667	0.669
0.363889	0.662	0.446	0.683	0.645	0.668	0.67
0.364583	0.661	0.446	0.684	0.646	0.669	0.672
0.365278	0.662	0.446	0.687	0.647	0.67	0.673
0.365972	0.662	0.448	0.688	0.647	0.671	0.674
0.366667	0.662	0.45	0.69	0.648	0.673	0.675
0.367361	0.664	0.45	0.694	0.649	0.674	0.677
0.368056	0.665	0.448	0.695	0.649	0.676	0.678
0.36875	0.666	0.446	0.696	0.651	0.677	0.678
0.369444	0.666	0.446	0.697	0.654	0.678	0.679
0.370139	0.667	0.444	0.697	0.655	0.679	0.679
0.370833	0.667	0.443	0.697	0.658	0.68	0.68
0.371528	0.667	0.442	0.698	0.658	0.682	0.68
0.372222	0.668	0.441	0.698	0.659	0.683	0.68
0.372917	0.67	0.438	0.699	0.66	0.683	0.682
0.373611	0.671	0.439	0.7	0.66	0.683	0.682
0.374306	0.673	0.439	0.701	0.66	0.683	0.683
0.375	0.674	0.441	0.701	0.662	0.685	0.683
0.375694	0.675	0.438	0.702	0.663	0.686	0.683
0.376389	0.678	0.441	0.702	0.664	0.686	0.683
0.377083	0.678	0.441	0.702	0.664	0.687	0.683
0.377778	0.679	0.44	0.705	0.666	0.688	0.684
0.378472	0.679	0.442	0.706	0.666	0.689	0.686
0.379167	0.679	0.441	0.706	0.666	0.69	0.686
0.379861	0.681	0.438	0.709	0.667	0.691	0.686
0.380556	0.682	0.439	0.71	0.671	0.691	0.688
0.38125	0.683	0.438	0.712	0.671	0.692	0.689
0.381944	0.685	0.438	0.714	0.671	0.693	0.69
0.382639	0.685	0.434	0.714	0.674	0.693	0.69
0.383333	0.686	0.434	0.714	0.676	0.694	0.691
0.384028	0.686	0.432	0.715	0.678	0.698	0.691
0.384722	0.686	0.432	0.715	0.678	0.698	0.692
0.385417	0.686	0.431	0.716	0.68	0.7	0.693
0.386111	0.688	0.431	0.716	0.681	0.702	0.695
0.386806	0.689	0.432	0.717	0.682	0.702	0.697
0.3875	0.689	0.434	0.718	0.682	0.702	0.698
0.388194	0.689	0.433	0.719	0.684	0.703	0.698
0.388889	0.69	0.431	0.722	0.685	0.704	0.699
0.389583	0.691	0.432	0.722	0.685	0.705	0.699
0.390278	0.692	0.432	0.722	0.686	0.706	0.702
0.390972	0.693	0.432	0.723	0.69	0.706	0.703
0.391667	0.692	0.429	0.725	0.69	0.707	0.703
0.392361	0.692	0.427	0.726	0.692	0.709	0.703
0.393056	0.694	0.428	0.727	0.694	0.71	0.703
0.39375	0.698	0.43	0.729	0.694	0.711	0.703
0.394444	0.7	0.43	0.73	0.696	0.712	0.705
0.395139	0.701	0.43	0.73	0.698	0.714	0.706
0.395833	0.703	0.43	0.73	0.7	0.714	0.707
0.396528	0.703	0.431	0.732	0.7	0.716	0.707
0.397222	0.703	0.43	0.734	0.702	0.717	0.707
0.397917	0.703	0.431	0.736	0.704	0.719	0.707
0.398611	0.706	0.43	0.737	0.704	0.72	0.709
0.399306	0.706	0.426	0.738	0.704	0.721	0.71
0.4	0.71	0.423	0.74	0.704	0.721	0.711
0.400694	0.711	0.422	0.742	0.706	0.722	0.714
0.401389	0.712	0.422	0.743	0.707	0.722	0.718
0.402083	0.714	0.422	0.744	0.707	0.723	0.718
0.402778	0.714	0.42	0.745	0.71	0.723	0.719
0.403472	0.715	0.42	0.746	0.71	0.726	0.72
0.404167	0.715	0.418	0.747	0.712	0.726	0.722
0.404861	0.715	0.417	0.75	0.714	0.726	0.722
0.405556	0.718	0.417	0.751	0.714	0.727	0.724
0.40625	0.72	0.418	0.752	0.714	0.729	0.726
0.406944	0.721	0.416	0.754	0.714	0.73	0.728
0.407639	0.722	0.412	0.754	0.714	0.73	0.729
0.408333	0.723	0.413	0.754	0.714	0.73	0.73
0.409028	0.723	0.412	0.756	0.714	0.732	0.731
0.409722	0.725	0.412	0.757	0.714	0.734	0.734
0.410417	0.725	0.412	0.758	0.716	0.734	0.734
0.411111	0.725	0.41	0.76	0.717	0.734	0.734
0.411806	0.726	0.406	0.76	0.719	0.736	0.735
0.4125	0.727	0.408	0.76	0.721	0.738	0.736
0.413194	0.726	0.408	0.76	0.721	0.738	0.738
0.413889	0.726	0.407	0.762	0.721	0.739	0.738
0.414583	0.727	0.401	0.762	0.722	0.739	0.74
0.415278	0.728	0.401	0.764	0.724	0.74	0.743
0.415972	0.729	0.402	0.764	0.725	0.74	0.743
0.416667	0.73	0.403	0.766	0.726	0.741	0.745
0.417361	0.73	0.404	0.767	0.726	0.742	0.746
0.418056	0.731	0.402	0.768	0.726	0.742	0.748
0.41875	0.733	0.402	0.769	0.726	0.744	0.75
0.419444	0.733	0.405	0.77	0.729	0.744	0.75
0.420139	0.734	0.402	0.77	0.73	0.744	0.752
0.420833	0.734	0.399	0.77	0.73	0.745	0.752
0.421528	0.735	0.398	0.771	0.733	0.747	0.754
0.422222	0.737	0.396	0.772	0.734	0.749	0.755
0.422917	0.738	0.395	0.772	0.735	0.751	0.756
0.423611	0.74	0.396	0.774	0.736	0.751	0.758
0.424306	0.74	0.394	0.774	0.737	0.752	0.759
0.425	0.74	0.393	0.774	0.738	0.753	0.761
0.425694	0.74	0.393	0.778	0.738	0.754	0.761
0.426389	0.74	0.392	0.779	0.738	0.755	0.761
0.427083	0.742	0.394	0.782	0.738	0.755	0.762
0.427778	0.743	0.394	0.784	0.739	0.757	0.763
0.428472	0.746	0.395	0.785	0.741	0.758	0.764
0.429167	0.746	0.394	0.785	0.741	0.759	0.764
0.429861	0.748	0.394	0.785	0.741	0.76	0.765
0.430556	0.749	0.394	0.786	0.742	0.761	0.767
0.43125	0.75	0.392	0.787	0.746	0.762	0.768
0.431944	0.753	0.39	0.787	0.746	0.762	0.769
0.432639	0.754	0.39	0.787	0.748	0.764	0.77
0.433333	0.754	0.389	0.788	0.75	0.765	0.77
0.434028	0.754	0.389	0.791	0.75	0.766	0.77
0.434722	0.753	0.389	0.792	0.751	0.769	0.773
0.435417	0.754	0.386	0.793	0.752	0.77	0.774
0.436111	0.754	0.384	0.794	0.752	0.77	0.774
0.436806	0.755	0.386	0.798	0.753	0.771	0.777
0.4375	0.756	0.384	0.798	0.754	0.772	0.778
0.438194	0.758	0.382	0.798	0.754	0.774	0.778
0.438889	0.758	0.379	0.799	0.755	0.774	0.779
0.439583	0.758	0.378	0.8	0.757	0.775	0.78
0.440278	0.76	0.377	0.801	0.757	0.776	0.781
0.440972	0.761	0.376	0.802	0.76	0.777	0.782
0.441667	0.762	0.377	0.803	0.761	0.78	0.782
0.442361	0.765	0.379	0.803	0.761	0.781	0.782
0.443056	0.765	0.379	0.804	0.763	0.782	0.782
0.44375	0.765	0.378	0.806	0.763	0.782	0.782
0.444444	0.766	0.378	0.809	0.763	0.784	0.787
0.445139	0.768	0.379	0.81	0.763	0.785	0.79
0.445833	0.767	0.378	0.81	0.765	0.785	0.79
0.446528	0.771	0.378	0.811	0.765	0.786	0.79
0.447222	0.772	0.375	0.813	0.766	0.786	0.791
0.447917	0.774	0.375	0.814	0.766	0.786	0.792
0.448611	0.777	0.373	0.814	0.769	0.788	0.794
0.449306	0.778	0.375	0.814	0.771	0.788	0.796
0.45	0.779	0.374	0.816	0.771	0.789	0.797
0.450694	0.778	0.374	0.816	0.772	0.789	0.798
0.451389	0.777	0.372	0.817	0.774	0.789	0.798
0.452083	0.779	0.369	0.816	0.776	0.79	0.798
0.452778	0.779	0.368	0.819	0.777	0.79	0.8
0.453472	0.781	0.365	0.821	0.777	0.792	0.802
0.454167	0.78	0.364	0.823	0.778	0.793	0.803
0.454861	0.781	0.363	0.824	0.781	0.796	0.803
0.455556	0.782	0.362	0.826	0.782	0.798	0.803
0.45625	0.784	0.363	0.826	0.784	0.801	0.806
0.456944	0.786	0.361	0.826	0.784	0.803	0.806
0.457639	0.788	0.36	0.826	0.787	0.804	0.809
0.458333	0.789	0.362	0.828	0.787	0.806	0.809
0.459028	0.789	0.361	0.828	0.789	0.809	0.809
0.459722	0.79	0.359	0.829	0.79	0.81	0.81
0.460417	0.79	0.359	0.83	0.79	0.81	0.811
0.461111	0.79	0.358	0.83	0.791	0.811	0.811
0.461806	0.79	0.357	0.831	0.791	0.813	0.813
0.4625	0.79	0.355	0.832	0.793	0.814	0.813
0.463194	0.79	0.353	0.832	0.794	0.814	0.813
0.463889	0.793	0.354	0.833	0.795	0.814	0.814
0.464583	0.794	0.355	0.834	0.795	0.814	0.814
0.465278	0.796	0.355	0.835	0.797	0.817	0.815
0.465972	0.796	0.351	0.836	0.798	0.817	0.816
0.466667	0.799	0.35	0.838	0.8	0.817	0.817
0.467361	0.799	0.35	0.838	0.801	0.818	0.818
0.468056	0.799	0.349	0.839	0.802	0.819	0.819
0.46875	0.799	0.347	0.841	0.802	0.82	0.82
0.469444	0.801	0.346	0.841	0.803	0.82	0.821
0.470139	0.802	0.348	0.842	0.804	0.82	0.822
0.470833	0.803	0.347	0.844	0.806	0.822	0.822
0.471528	0.803	0.346	0.846	0.806	0.824	0.822
0.472222	0.804	0.345	0.847	0.806	0.824	0.824
0.472917	0.804	0.344	0.848	0.807	0.825	0.824
0.473611	0.805	0.349	0.849	0.808	0.825	0.825
0.474306	0.804	0.35	0.849	0.808	0.826	0.828
0.475	0.805	0.347	0.85	0.808	0.826	0.829
0.475694	0.806	0.347	0.85	0.809	0.829	0.83
0.476389	0.806	0.347	0.851	0.81	0.83	0.831
0.477083	0.807	0.347	0.851	0.81	0.83	0.831
0.477778	0.808	0.346	0.852	0.81	0.831	0.834
0.478472	0.809	0.346	0.853	0.81	0.834	0.835
0.479167	0.811	0.346	0.854	0.812	0.834	0.837
0.479861	0.811	0.345	0.855	0.814	0.835	0.837
0.480556	0.811	0.346	0.856	0.814	0.837	0.839
0.48125	0.813	0.345	0.858	0.816	0.838	0.84
0.481944	0.813	0.344	0.86	0.816	0.838	0.842
0.482639	0.813	0.343	0.861	0.818	0.838	0.842
0.483333	0.813	0.344	0.862	0.818	0.839	0.843
0.484028	0.814	0.342	0.862	0.82	0.841	0.844
0.484722	0.814	0.342	0.863	0.821	0.842	0.845
0.485417	0.817	0.341	0.865	0.821	0.846	0.846
0.486111	0.816	0.342	0.866	0.823	0.846	0.846
0.486806	0.818	0.34	0.866	0.823	0.847	0.847
0.4875	0.818	0.341	0.868	0.823	0.847	0.848
0.488194	0.819	0.341	0.868	0.824	0.847	0.849
0.488889	0.821	0.34	0.868	0.825	0.847	0.85
0.489583	0.822	0.338	0.87	0.826	0.848	0.85
0.490278	0.822	0.337	0.87	0.827	0.849	0.852
0.490972	0.822	0.338	0.871	0.827	0.85	0.855
0.491667	0.822	0.337	0.872	0.83	0.851	0.857
0.492361	0.822	0.338	0.873	0.83	0.853	0.858
0.493056	0.823	0.338	0.874	0.831	0.854	0.858
0.49375	0.826	0.34	0.875	0.833	0.854	0.858
0.494444	0.826	0.339	0.876	0.835	0.854	0.858
0.495139	0.826	0.338	0.877	0.837	0.857	0.862
0.495833	0.828	0.338	0.877	0.838	0.858	0.862
0.496528	0.828	0.338	0.878	0.838	0.861	0.863
0.497222	0.829	0.335	0.878	0.839	0.862	0.864
0.497917	0.831	0.335	0.879	0.842	0.863	0.864
0.498611	0.832	0.334	0.88	0.844	0.863	0.865
0.499306	0.832	0.334	0.88	0.846	0.863	0.866
0.5	0.834	0.334	0.881	0.85	0.866	0.866
0.500694	0.834	0.334	0.881	0.851	0.868	0.868
0.501389	0.833	0.333	0.882	0.852	0.869	0.869
0.502083	0.835	0.33	0.883	0.854	0.87	0.87
0.502778	0.838	0.329	0.886	0.856	0.87	0.871
0.503472	0.839	0.329	0.887	0.858	0.871	0.872
0.504167	0.84	0.328	0.888	0.858	0.873	0.874
0.504861	0.841	0.325	0.888	0.858	0.873	0.875
0.505556	0.841	0.323	0.889	0.86	0.874	0.878
0.50625	0.841	0.322	0.89	0.86	0.875	0.878
0.506944	0.84	0.318	0.89	0.86	0.876	0.878
0.507639	0.841	0.317	0.891	0.861	0.876	0.879
0.508333	0.842	0.316	0.893	0.862	0.876	0.879
0.509028	0.842	0.314	0.896	0.862	0.878	0.879
0.509722	0.846	0.314	0.9	0.863	0.878	0.88
0.510417	0.848	0.316	0.901	0.865	0.878	0.881
0.511111	0.849	0.314	0.901	0.866	0.881	0.881
0.511806	0.85	0.313	0.902	0.867	0.882	0.881
0.5125	0.85	0.31	0.902	0.868	0.883	0.882
0.513194	0.85	0.31	0.902	0.87	0.884	0.882
0.513889	0.85	0.309	0.903	0.87	0.885	0.882
0.514583	0.849	0.307	0.904	0.871	0.886	0.883
0.515278	0.85	0.306	0.904	0.872	0.887	0.884
0.515972	0.85	0.302	0.904	0.873	0.887	0.887
0.516667	0.85	0.301	0.906	0.875	0.889	0.889
0.517361	0.852	0.298	0.906	0.876	0.89	0.89
0.518056	0.852	0.298	0.907	0.878	0.894	0.89
0.51875	0.852	0.299	0.908	0.878	0.896	0.893
0.519444	0.852	0.297	0.91	0.879	0.898	0.893
0.520139	0.853	0.293	0.912	0.881	0.898	0.895
0.520833	0.852	0.293	0.914	0.882	0.898	0.896
0.521528	0.853	0.291	0.914	0.882	0.898	0.896
0.522222	0.854	0.29	0.918	0.883	0.9	0.898
0.522917	0.856	0.288	0.918	0.884	0.901	0.898
0.523611	0.858	0.286	0.92	0.886	0.902	0.9
0.524306	0.858	0.284	0.922	0.887	0.905	0.902
0.525	0.858	0.282	0.922	0.889	0.906	0.906
0.525694	0.858	0.282	0.922	0.89	0.907	0.907
0.526389	0.858	0.282	0.923	0.89	0.91	0.907
0.527083	0.859	0.28	0.923	0.893	0.91	0.908
0.527778	0.859	0.28	0.923	0.894	0.91	0.91
0.528472	0.86	0.278	0.923	0.895	0.912	0.91
0.529167	0.861	0.274	0.925	0.895	0.914	0.912
0.529861	0.861	0.273	0.925	0.898	0.914	0.913
0.530556	0.862	0.272	0.926	0.901	0.914	0.914
0.53125	0.862	0.27	0.926	0.901	0.914	0.915
0.531944	0.863	0.27	0.928	0.901	0.914	0.915
0.532639	0.864	0.271	0.928	0.902	0.916	0.916
0.533333	0.866	0.27	0.93	0.902	0.916	0.917
0.534028	0.867	0.27	0.933	0.903	0.919	0.918
0.534722	0.868	0.266	0.934	0.904	0.92	0.921
0.535417	0.869	0.266	0.934	0.905	0.921	0.922
0.536111	0.87	0.267	0.935	0.906	0.923	0.922
0.536806	0.871	0.266	0.938	0.908	0.923	0.922
0.5375	0.874	0.267	0.938	0.908	0.924	0.923
0.538194	0.875	0.266	0.94	0.908	0.926	0.923
0.538889	0.876	0.268	0.94	0.91	0.927	0.924
0.539583	0.878	0.266	0.941	0.91	0.927	0.925
0.540278	0.878	0.261	0.942	0.91	0.928	0.926
0.540972	0.878	0.261	0.942	0.912	0.93	0.927
0.541667	0.879	0.259	0.944	0.913	0.932	0.929
0.542361	0.879	0.254	0.944	0.913	0.934	0.93
0.543056	0.88	0.254	0.945	0.914	0.934	0.933
0.54375	0.882	0.253	0.945	0.916	0.937	0.934
0.544444	0.882	0.253	0.945	0.917	0.937	0.934
0.545139	0.884	0.254	0.946	0.918	0.938	0.936
0.545833	0.886	0.254	0.946	0.918	0.938	0.936
0.546528	0.886	0.253	0.947	0.918	0.939	0.936
0.547222	0.886	0.252	0.95	0.92	0.939	0.938
0.547917	0.886	0.251	0.95	0.92	0.942	0.939
0.548611	0.886	0.251	0.953	0.921	0.942	0.94
0.549306	0.886	0.25	0.954	0.922	0.943	0.941
0.55	0.886	0.25	0.954	0.924	0.945	0.941
0.550694	0.888	0.247	0.954	0.925	0.945	0.942
0.551389	0.89	0.245	0.956	0.925	0.946	0.943
0.552083	0.892	0.244	0.956	0.927	0.946	0.943
0.552778	0.894	0.243	0.957	0.928	0.946	0.944
0.553472	0.898	0.244	0.957	0.93	0.947	0.946
0.554167	0.898	0.243	0.958	0.93	0.947	0.946
0.554861	0.899	0.244	0.961	0.93	0.947	0.947
0.555556	0.899	0.244	0.961	0.931	0.947	0.947
0.55625	0.9	0.24	0.963	0.933	0.949	0.949
0.556944	0.901	0.238	0.964	0.935	0.954	0.949
0.557639	0.899	0.238	0.969	0.936	0.956	0.951
0.558333	0.902	0.238	0.969	0.938	0.957	0.952
0.559028	0.903	0.238	0.97	0.939	0.958	0.952
0.559722	0.903	0.241	0.971	0.939	0.959	0.954
0.560417	0.906	0.242	0.975	0.94	0.96	0.957
0.561111	0.907	0.242	0.976	0.941	0.961	0.959
0.561806	0.91	0.24	0.978	0.942	0.962	0.959
0.5625	0.91	0.238	0.979	0.943	0.962	0.961
0.563194	0.909	0.239	0.98	0.946	0.966	0.962
0.563889	0.91	0.236	0.982	0.946	0.966	0.964
0.564583	0.91	0.237	0.982	0.946	0.968	0.965
0.565278	0.91	0.235	0.982	0.946	0.969	0.965
0.565972	0.91	0.234	0.984	0.948	0.97	0.965
0.566667	0.91	0.233	0.984	0.948	0.971	0.965
0.567361	0.91	0.23	0.984	0.949	0.972	0.967
0.568056	0.91	0.226	0.985	0.95	0.974	0.968
0.56875	0.911	0.227	0.986	0.95	0.974	0.968
0.569444	0.913	0.227	0.986	0.95	0.974	0.97
0.570139	0.913	0.227	0.986	0.951	0.976	0.97
0.570833	0.913	0.226	0.986	0.954	0.976	0.972
0.571528	0.914	0.226	0.987	0.954	0.977	0.973
0.572222	0.916	0.226	0.988	0.954	0.978	0.973
0.572917	0.918	0.222	0.989	0.954	0.978	0.976
0.573611	0.918	0.222	0.99	0.954	0.978	0.979
0.574306	0.917	0.221	0.99	0.955	0.978	0.981
0.575	0.917	0.223	0.991	0.955	0.979	0.982
0.575694	0.918	0.222	0.994	0.957	0.981	0.982
0.576389	0.918	0.221	0.994	0.958	0.982	0.982
0.577083	0.918	0.22	0.994	0.958	0.983	0.982
0.577778	0.918	0.219	0.996	0.959	0.984	0.982
0.578472	0.918	0.216	0.998	0.961	0.985	0.982
0.579167	0.918	0.214	0.998	0.963	0.988	0.983
0.579861	0.918	0.213	0.999	0.964	0.989	0.985
0.580556	0.92	0.213	0.999	0.966	0.989	0.986
0.58125	0.921	0.211	1.002	0.968	0.989	0.988
0.581944	0.922	0.21	1.004	0.969	0.99	0.989
0.582639	0.923	0.211	1.006	0.971	0.991	0.991
0.583333	0.924	0.21	1.006	0.972	0.992	0.994
0.584028	0.926	0.208	1.008	0.973	0.993	0.994
0.584722	0.926	0.208	1.01	0.973	0.994	0.994
0.585417	0.926	0.21	1.01	0.973	0.994	0.994
0.586111	0.926	0.21	1.012	0.973	0.994	0.994
0.586806	0.927	0.208	1.013	0.973	0.995	0.995
0.5875	0.93	0.206	1.014	0.974	0.998	0.996
0.588194	0.93	0.205	1.016	0.976	0.999	0.998
0.588889	0.932	0.203	1.018	0.977	1	0.998
0.589583	0.931	0.204	1.018	0.977	1.001	0.999
0.590278	0.933	0.206	1.019	0.977	1.003	1
0.590972	0.934	0.204	1.022	0.978	1.004	1.002
0.591667	0.935	0.202	1.023	0.978	1.006	1.003
0.592361	0.939	0.202	1.026	0.978	1.007	1.005
0.593056	0.938	0.202	1.026	0.978	1.007	1.007
0.59375	0.939	0.202	1.027	0.978	1.01	1.007
0.594444	0.939	0.198	1.028	0.98	1.01	1.01
0.595139	0.94	0.198	1.029	0.981	1.012	1.01
0.595833	0.941	0.198	1.031	0.982	1.013	1.011
0.596528	0.942	0.198	1.033	0.982	1.013	1.013
0.597222	0.942	0.198	1.034	0.985	1.013	1.014
0.597917	0.942	0.198	1.035	0.986	1.014	1.014
0.598611	0.942	0.195	1.035	0.987	1.015	1.015
0.599306	0.944	0.193	1.037	0.988	1.015	1.016
0.6	0.945	0.194	1.038	0.989	1.017	1.016
0.600694	0.946	0.19	1.039	0.99	1.017	1.018
0.601389	0.946	0.191	1.039	0.991	1.019	1.019
0.602083	0.947	0.194	1.04	0.993	1.019	1.02
0.602778	0.947	0.195	1.041	0.993	1.019	1.022
0.603472	0.947	0.194	1.042	0.995	1.02	1.022
0.604167	0.947	0.194	1.042	0.996	1.021	1.023
0.604861	0.947	0.194	1.043	0.997	1.022	1.023
0.605556	0.949	0.197	1.044	0.998	1.022	1.024
0.60625	0.949	0.195	1.046	1	1.023	1.025
0.606944	0.95	0.194	1.047	1	1.024	1.025
0.607639	0.95	0.194	1.05	1.001	1.025	1.027
0.608333	0.95	0.191	1.053	1.003	1.025	1.028
0.609028	0.952	0.188	1.054	1.004	1.026	1.03
0.609722	0.952	0.186	1.054	1.004	1.026	1.032
0.610417	0.951	0.186	1.056	1.006	1.028	1.033
0.611111	0.952	0.184	1.057	1.006	1.032	1.033
0.611806	0.95	0.182	1.058	1.006	1.032	1.036
0.6125	0.953	0.182	1.059	1.008	1.034	1.037
0.613194	0.953	0.182	1.06	1.009	1.038	1.037
0.613889	0.954	0.182	1.06	1.01	1.039	1.038
0.614583	0.954	0.183	1.061	1.01	1.039	1.041
0.615278	0.955	0.184	1.061	1.011	1.039	1.042
0.615972	0.956	0.182	1.062	1.011	1.041	1.042
0.616667	0.954	0.182	1.062	1.012	1.042	1.042
0.617361	0.955	0.182	1.064	1.013	1.045	1.043
0.618056	0.956	0.182	1.064	1.014	1.046	1.045
0.61875	0.956	0.181	1.065	1.015	1.047	1.046
0.619444	0.957	0.183	1.066	1.017	1.05	1.048
0.620139	0.958	0.184	1.068	1.019	1.05	1.05
0.620833	0.958	0.182	1.068	1.019	1.052	1.051
0.621528	0.96	0.182	1.07	1.022	1.052	1.051
0.622222	0.96	0.184	1.073	1.022	1.052	1.051
0.622917	0.963	0.182	1.074	1.022	1.054	1.052
0.623611	0.962	0.184	1.074	1.022	1.055	1.054
0.624306	0.964	0.186	1.075	1.023	1.056	1.055
0.625	0.966	0.186	1.075	1.024	1.057	1.056
0.625694	0.966	0.186	1.076	1.026	1.058	1.058
0.626389	0.966	0.185	1.078	1.026	1.062	1.058
0.627083	0.967	0.185	1.078	1.028	1.062	1.059
0.627778	0.97	0.186	1.078	1.03	1.065	1.06
0.628472	0.97	0.185	1.078	1.03	1.066	1.061
0.629167	0.968	0.184	1.078	1.03	1.067	1.062
0.629861	0.969	0.182	1.078	1.031	1.068	1.063
0.630556	0.969	0.182	1.08	1.031	1.068	1.064
0.63125	0.968	0.182	1.081	1.032	1.071	1.066
0.631944	0.97	0.185	1.081	1.032	1.072	1.067
0.632639	0.971	0.182	1.083	1.033	1.074	1.069
0.633333	0.971	0.182	1.083	1.033	1.075	1.07
0.634028	0.97	0.184	1.083	1.034	1.078	1.07
0.634722	0.971	0.182	1.083	1.035	1.078	1.071
0.635417	0.97	0.183	1.085	1.036	1.079	1.074
0.636111	0.969	0.183	1.086	1.037	1.079	1.074
0.636806	0.97	0.182	1.086	1.038	1.079	1.076
0.6375	0.97	0.18	1.09	1.038	1.079	1.076
0.638194	0.97	0.181	1.09	1.038	1.082	1.078
0.638889	0.97	0.182	1.089	1.039	1.084	1.078
0.639583	0.97	0.182	1.089	1.039	1.086	1.079
0.640278	0.972	0.182	1.091	1.04	1.086	1.081
0.640972	0.972	0.179	1.092	1.042	1.086	1.081
0.641667	0.973	0.178	1.093	1.042	1.086	1.081
0.642361	0.973	0.177	1.093	1.044	1.089	1.082
0.643056	0.974	0.175	1.093	1.046	1.09	1.082
0.64375	0.973	0.174	1.093	1.046	1.09	1.082
0.644444	0.973	0.172	1.094	1.046	1.09	1.082
0.645139	0.974	0.174	1.094	1.046	1.091	1.084
0.645833	0.974	0.171	1.094	1.046	1.091	1.085
0.646528	0.975	0.172	1.096	1.046	1.094	1.088
0.647222	0.974	0.17	1.097	1.046	1.094	1.088
0.647917	0.973	0.169	1.097	1.046	1.095	1.089
0.648611	0.974	0.168	1.098	1.046	1.096	1.09
0.649306	0.974	0.167	1.098	1.046	1.097	1.09
0.65	0.976	0.169	1.098	1.047	1.098	1.09
0.650694	0.977	0.166	1.098	1.048	1.098	1.092
0.651389	0.977	0.168	1.099	1.048	1.099	1.092
0.652083	0.978	0.168	1.1	1.049	1.099	1.094
0.652778	0.979	0.167	1.1	1.049	1.1	1.095
0.653472	0.978	0.167	1.101	1.05	1.101	1.097
0.654167	0.979	0.168	1.102	1.051	1.102	1.098
0.654861	0.98	0.166	1.102	1.052	1.104	1.098
0.655556	0.981	0.169	1.104	1.054	1.104	1.099
0.65625	0.981	0.168	1.105	1.054	1.106	1.099
0.656944	0.981	0.169	1.106	1.058	1.106	1.101
0.657639	0.981	0.168	1.107	1.059	1.107	1.102
0.658333	0.982	0.169	1.11	1.059	1.108	1.102
0.659028	0.982	0.17	1.11	1.062	1.11	1.103
0.659722	0.982	0.17	1.112	1.064	1.111	1.104
0.660417	0.983	0.168	1.113	1.065	1.113	1.106
0.661111	0.983	0.169	1.114	1.065	1.113	1.106
0.661806	0.984	0.17	1.114	1.065	1.114	1.106
0.6625	0.984	0.169	1.114	1.068	1.114	1.108
0.663194	0.984	0.168	1.114	1.069	1.116	1.11
0.663889	0.983	0.168	1.116	1.071	1.118	1.11
0.664583	0.983	0.169	1.116	1.075	1.118	1.112
0.665278	0.986	0.168	1.116	1.078	1.118	1.113
0.665972	0.986	0.166	1.118	1.078	1.119	1.114
0.666667	0.985	0.163	1.118	1.078	1.119	1.116
0.667361	0.985	0.166	1.119	1.078	1.121	1.116
0.668056	0.986	0.164	1.12	1.079	1.121	1.118
0.66875	0.986	0.16	1.122	1.081	1.121	1.119
0.669444	0.987	0.161	1.122	1.082	1.121	1.119
0.670139	0.99	0.161	1.123	1.083	1.122	1.12
0.670833	0.989	0.159	1.123	1.085	1.123	1.122
0.671528	0.989	0.16	1.124	1.088	1.126	1.122
0.672222	0.99	0.16	1.126	1.088	1.126	1.124
0.672917	0.99	0.161	1.126	1.089	1.127	1.124
0.673611	0.99	0.161	1.129	1.089	1.128	1.125
0.674306	0.99	0.162	1.13	1.09	1.129	1.126
0.675	0.992	0.163	1.13	1.091	1.13	1.126
0.675694	0.994	0.16	1.131	1.094	1.13	1.126
0.676389	0.994	0.158	1.134	1.095	1.13	1.126
0.677083	0.994	0.158	1.135	1.096	1.13	1.127
0.677778	0.994	0.157	1.135	1.097	1.13	1.13
0.678472	0.997	0.153	1.136	1.098	1.13	1.131
0.679167	0.998	0.148	1.137	1.099	1.13	1.131
0.679861	0.998	0.15	1.138	1.099	1.131	1.133
0.680556	0.998	0.15	1.138	1.099	1.132	1.134
0.68125	1.001	0.15	1.138	1.099	1.133	1.136
0.681944	1.002	0.149	1.139	1.1	1.134	1.136
0.682639	1.004	0.15	1.14	1.102	1.134	1.137
0.683333	1.003	0.149	1.141	1.102	1.135	1.137
0.684028	1.004	0.146	1.142	1.103	1.137	1.137
0.684722	1.005	0.144	1.144	1.105	1.138	1.138
0.685417	1.006	0.144	1.144	1.105	1.141	1.139
0.686111	1.005	0.145	1.145	1.106	1.143	1.139
0.686806	1.002	0.145	1.145	1.106	1.144	1.139
0.6875	1.002	0.146	1.147	1.106	1.146	1.139
0.688194	1.002	0.149	1.147	1.108	1.146	1.14
0.688889	1.006	0.147	1.147	1.109	1.146	1.14
0.689583	1.009	0.146	1.149	1.11	1.148	1.142
0.690278	1.01	0.145	1.15	1.11	1.15	1.143
0.690972	1.011	0.143	1.15	1.11	1.15	1.144
0.691667	1.011	0.142	1.15	1.113	1.151	1.144
0.692361	1.012	0.144	1.151	1.114	1.152	1.145
0.693056	1.013	0.142	1.152	1.116	1.153	1.146
0.69375	1.013	0.14	1.152	1.118	1.153	1.146
0.694444	1.013	0.14	1.153	1.119	1.153	1.147
0.695139	1.014	0.14	1.154	1.119	1.154	1.149
0.695833	1.016	0.139	1.157	1.119	1.154	1.152
0.696528	1.015	0.139	1.157	1.119	1.156	1.153
0.697222	1.015	0.138	1.157	1.12	1.158	1.155
0.697917	1.015	0.14	1.158	1.122	1.158	1.155
0.698611	1.015	0.142	1.161	1.122	1.159	1.157
0.699306	1.014	0.139	1.161	1.123	1.162	1.157
0.7	1.014	0.139	1.161	1.123	1.164	1.158
0.700694	1.013	0.137	1.162	1.124	1.164	1.158
0.701389	1.014	0.138	1.163	1.126	1.165	1.159
0.702083	1.017	0.14	1.165	1.128	1.166	1.16
0.702778	1.018	0.138	1.166	1.128	1.166	1.16
0.703472	1.017	0.136	1.166	1.129	1.166	1.161
0.704167	1.016	0.135	1.168	1.131	1.169	1.163
0.704861	1.016	0.136	1.17	1.132	1.169	1.163
0.705556	1.016	0.136	1.17	1.133	1.17	1.164
0.70625	1.018	0.139	1.17	1.134	1.171	1.165
0.706944	1.019	0.14	1.171	1.134	1.172	1.166
0.707639	1.019	0.139	1.171	1.134	1.173	1.166
0.708333	1.019	0.135	1.173	1.135	1.173	1.168
0.709028	1.018	0.134	1.174	1.137	1.174	1.17
0.709722	1.018	0.132	1.174	1.138	1.174	1.171
0.710417	1.018	0.134	1.175	1.14	1.176	1.174
0.711111	1.017	0.134	1.178	1.142	1.176	1.176
0.711806	1.018	0.134	1.179	1.144	1.177	1.177
0.7125	1.019	0.133	1.18	1.147	1.177	1.177
0.713194	1.018	0.132	1.182	1.149	1.181	1.178
0.713889	1.02	0.132	1.182	1.149	1.182	1.179
0.714583	1.02	0.133	1.182	1.15	1.182	1.179
0.715278	1.019	0.134	1.183	1.15	1.185	1.182
0.715972	1.019	0.134	1.183	1.153	1.185	1.182
0.716667	1.018	0.132	1.186	1.154	1.185	1.182
0.717361	1.018	0.13	1.188	1.154	1.186	1.182
0.718056	1.018	0.13	1.189	1.157	1.187	1.182
0.71875	1.018	0.129	1.191	1.158	1.187	1.182
0.719444	1.019	0.13	1.191	1.158	1.187	1.182
0.720139	1.02	0.129	1.193	1.159	1.188	1.183
0.720833	1.021	0.128	1.195	1.162	1.188	1.186
0.721528	1.021	0.126	1.196	1.164	1.19	1.186
0.722222	1.021	0.124	1.196	1.166	1.193	1.188
0.722917	1.022	0.122	1.198	1.168	1.193	1.19
0.723611	1.022	0.124	1.198	1.168	1.193	1.19
0.724306	1.023	0.123	1.198	1.168	1.193	1.19
0.725	1.023	0.123	1.2	1.17	1.193	1.192
0.725694	1.024	0.126	1.2	1.17	1.193	1.193
0.726389	1.022	0.126	1.2	1.17	1.194	1.194
0.727083	1.022	0.127	1.202	1.17	1.194	1.195
0.727778	1.023	0.13	1.202	1.171	1.196	1.197
0.728472	1.023	0.13	1.205	1.171	1.197	1.198
0.729167	1.025	0.129	1.206	1.172	1.198	1.199
0.729861	1.026	0.127	1.207	1.173	1.198	1.199
0.730556	1.025	0.127	1.207	1.174	1.198	1.202
0.73125	1.026	0.126	1.207	1.175	1.198	1.205
0.731944	1.026	0.129	1.209	1.176	1.199	1.205
0.732639	1.024	0.133	1.209	1.178	1.199	1.205
0.733333	1.024	0.134	1.21	1.178	1.202	1.206
0.734028	1.023	0.137	1.21	1.179	1.202	1.206
0.734722	1.028	0.135	1.212	1.179	1.203	1.206
0.735417	1.028	0.133	1.215	1.179	1.206	1.207
0.736111	1.029	0.134	1.217	1.18	1.206	1.209
0.736806	1.029	0.134	1.217	1.183	1.206	1.21
0.7375	1.03	0.134	1.218	1.186	1.206	1.212
0.738194	1.03	0.134	1.219	1.186	1.206	1.214
0.738889	1.03	0.134	1.219	1.187	1.207	1.214
0.739583	1.028	0.135	1.221	1.188	1.207	1.216
0.740278	1.029	0.134	1.222	1.189	1.207	1.218
0.740972	1.027	0.135	1.222	1.19	1.207	1.218
0.741667	1.026	0.134	1.222	1.191	1.21	1.218
0.742361	1.029	0.135	1.223	1.191	1.211	1.218
0.743056	1.03	0.137	1.225	1.192	1.211	1.22
0.74375	1.031	0.137	1.226	1.192	1.211	1.223
0.744444	1.031	0.137	1.226	1.194	1.213	1.225
0.745139	1.033	0.136	1.226	1.195	1.214	1.225
0.745833	1.032	0.134	1.226	1.196	1.214	1.227
0.746528	1.035	0.137	1.226	1.197	1.214	1.23
0.747222	1.034	0.138	1.227	1.198	1.214	1.23
0.747917	1.034	0.138	1.227	1.199	1.216	1.23
0.748611	1.035	0.138	1.228	1.2	1.218	1.232
0.749306	1.038	0.139	1.229	1.201	1.219	1.232
0.75	1.038	0.138	1.229	1.201	1.22	1.232
0.750694	1.039	0.137	1.23	1.203	1.221	1.234
0.751389	1.04	0.138	1.23	1.203	1.222	1.234
0.752083	1.039	0.138	1.23	1.204	1.222	1.236
0.752778	1.039	0.136	1.231	1.205	1.222	1.236
0.753472	1.037	0.137	1.233	1.206	1.222	1.236
0.754167	1.038	0.137	1.234	1.206	1.222	1.237
0.754861	1.04	0.136	1.234	1.206	1.223	1.237
0.755556	1.039	0.136	1.234	1.206	1.224	1.238
0.75625	1.04	0.134	1.237	1.207	1.225	1.238
0.756944	1.041	0.132	1.238	1.208	1.226	1.238
0.757639	1.04	0.131	1.238	1.209	1.231	1.239
0.758333	1.041	0.129	1.238	1.21	1.232	1.241
0.759028	1.041	0.13	1.24	1.21	1.232	1.242
0.759722	1.043	0.13	1.24	1.213	1.232	1.242
0.760417	1.043	0.13	1.241	1.213	1.233	1.242
0.761111	1.042	0.13	1.243	1.215	1.234	1.242
0.761806	1.044	0.127	1.243	1.218	1.234	1.245
0.7625	1.044	0.125	1.243	1.219	1.234	1.246
0.763194	1.046	0.124	1.244	1.219	1.237	1.246
0.763889	1.05	0.122	1.246	1.22	1.238	1.246
0.764583	1.053	0.122	1.247	1.221	1.239	1.246
0.765278	1.054	0.125	1.249	1.226	1.241	1.247
0.765972	1.053	0.123	1.25	1.227	1.242	1.247
0.766667	1.054	0.122	1.249	1.229	1.242	1.249
0.767361	1.058	0.122	1.25	1.23	1.242	1.25
0.768056	1.057	0.12	1.252	1.231	1.245	1.25
0.76875	1.058	0.12	1.254	1.232	1.246	1.254
0.769444	1.057	0.12	1.255	1.233	1.246	1.255
0.770139	1.058	0.12	1.258	1.234	1.246	1.256
0.770833	1.059	0.119	1.26	1.234	1.247	1.256
0.771528	1.059	0.12	1.26	1.236	1.249	1.257
0.772222	1.058	0.12	1.262	1.238	1.249	1.258
0.772917	1.06	0.119	1.264	1.238	1.249	1.259
0.773611	1.061	0.121	1.264	1.238	1.25	1.259
0.774306	1.061	0.118	1.264	1.239	1.25	1.262
0.775	1.062	0.118	1.264	1.239	1.25	1.262
0.775694	1.062	0.118	1.264	1.239	1.251	1.262
0.776389	1.063	0.118	1.265	1.239	1.251	1.264
0.777083	1.064	0.116	1.266	1.24	1.254	1.266
0.777778	1.065	0.12	1.268	1.241	1.256	1.266
0.778472	1.067	0.119	1.268	1.242	1.256	1.266
0.779167	1.07	0.118	1.269	1.242	1.256	1.266
0.779861	1.07	0.116	1.27	1.242	1.258	1.266
0.780556	1.07	0.117	1.27	1.242	1.26	1.266
0.78125	1.072	0.117	1.27	1.242	1.26	1.267
0.781944	1.074	0.114	1.27	1.242	1.262	1.268
0.782639	1.074	0.113	1.273	1.244	1.263	1.271
0.783333	1.077	0.113	1.273	1.245	1.264	1.272
0.784028	1.078	0.114	1.273	1.246	1.264	1.272
0.784722	1.08	0.114	1.274	1.247	1.266	1.273
0.785417	1.079	0.114	1.274	1.249	1.266	1.273
0.786111	1.078	0.117	1.275	1.25	1.268	1.274
0.786806	1.078	0.118	1.276	1.25	1.269	1.276
0.7875	1.077	0.121	1.277	1.25	1.27	1.277
0.788194	1.077	0.119	1.277	1.252	1.27	1.28
0.788889	1.077	0.118	1.277	1.253	1.272	1.282
0.789583	1.076	0.118	1.277	1.255	1.273	1.283
0.790278	1.077	0.117	1.277	1.257	1.276	1.285
0.790972	1.077	0.115	1.278	1.257	1.276	1.285
0.791667	1.078	0.116	1.279	1.257	1.278	1.286
0.792361	1.078	0.116	1.279	1.258	1.28	1.287
0.793056	1.075	0.118	1.279	1.258	1.281	1.288
0.79375	1.075	0.117	1.28	1.259	1.282	1.288
0.794444	1.076	0.114	1.28	1.259	1.282	1.29
0.795139	1.075	0.115	1.281	1.261	1.284	1.291
0.795833	1.074	0.115	1.282	1.262	1.284	1.293
0.796528	1.074	0.118	1.287	1.262	1.284	1.293
0.797222	1.074	0.119	1.29	1.263	1.286	1.293
0.797917	1.074	0.117	1.29	1.263	1.286	1.293
0.798611	1.073	0.116	1.291	1.264	1.286	1.294
0.799306	1.073	0.113	1.292	1.267	1.287	1.296
0.8	1.073	0.111	1.293	1.268	1.289	1.297
0.800694	1.071	0.113	1.294	1.27	1.289	1.298
0.801389	1.072	0.112	1.294	1.27	1.29	1.298
0.802083	1.071	0.113	1.297	1.273	1.291	1.298
0.802778	1.071	0.114	1.298	1.273	1.292	1.298
0.803472	1.071	0.115	1.299	1.274	1.296	1.298
0.804167	1.071	0.111	1.302	1.275	1.296	1.298
0.804861	1.071	0.107	1.302	1.276	1.297	1.3
0.805556	1.07	0.11	1.304	1.278	1.298	1.301
0.80625	1.071	0.108	1.305	1.278	1.301	1.302
0.806944	1.071	0.109	1.306	1.28	1.305	1.302
0.807639	1.073	0.106	1.307	1.28	1.305	1.304
0.808333	1.073	0.106	1.307	1.28	1.305	1.306
0.809028	1.071	0.105	1.308	1.281	1.305	1.306
0.809722	1.073	0.102	1.309	1.282	1.305	1.307
0.810417	1.07	0.102	1.309	1.282	1.305	1.307
0.811111	1.07	0.101	1.31	1.285	1.306	1.308
0.811806	1.069	0.099	1.312	1.286	1.306	1.309
0.8125	1.069	0.098	1.314	1.286	1.307	1.31
0.813194	1.069	0.098	1.314	1.287	1.307	1.311
0.813889	1.068	0.096	1.315	1.289	1.308	1.312
0.814583	1.068	0.097	1.315	1.291	1.31	1.314
0.815278	1.07	0.096	1.317	1.292	1.31	1.315
0.815972	1.07	0.098	1.318	1.292	1.31	1.315
0.816667	1.07	0.099	1.318	1.293	1.31	1.316
0.817361	1.069	0.1	1.319	1.293	1.311	1.316
0.818056	1.07	0.101	1.32	1.294	1.314	1.318
0.81875	1.07	0.101	1.321	1.294	1.316	1.318
0.819444	1.07	0.101	1.321	1.295	1.317	1.319
0.820139	1.07	0.101	1.322	1.295	1.318	1.32
0.820833	1.07	0.101	1.322	1.295	1.318	1.321
0.821528	1.07	0.099	1.322	1.295	1.319	1.322
0.822222	1.069	0.098	1.323	1.295	1.319	1.322
0.822917	1.069	0.095	1.324	1.296	1.319	1.322
0.823611	1.069	0.096	1.326	1.297	1.321	1.322
0.824306	1.069	0.099	1.326	1.297	1.321	1.324
0.825	1.07	0.098	1.326	1.298	1.322	1.325
0.825694	1.07	0.097	1.326	1.301	1.324	1.326
0.826389	1.07	0.099	1.328	1.302	1.325	1.326
0.827083	1.07	0.1	1.33	1.302	1.326	1.329
0.827778	1.07	0.098	1.331	1.302	1.326	1.329
0.828472	1.069	0.099	1.332	1.303	1.327	1.33
0.829167	1.067	0.097	1.332	1.303	1.33	1.331
0.829861	1.066	0.094	1.333	1.303	1.33	1.332
0.830556	1.066	0.093	1.334	1.304	1.33	1.334
0.83125	1.066	0.093	1.334	1.305	1.33	1.336
0.831944	1.066	0.094	1.335	1.305	1.333	1.337
0.832639	1.067	0.095	1.335	1.306	1.333	1.338
0.833333	1.068	0.095	1.336	1.308	1.333	1.338
0.834028	1.069	0.095	1.337	1.309	1.334	1.34
0.834722	1.07	0.095	1.338	1.309	1.335	1.343
0.835417	1.068	0.095	1.338	1.309	1.336	1.343
0.836111	1.068	0.094	1.339	1.31	1.338	1.343
0.836806	1.07	0.095	1.341	1.31	1.34	1.343
0.8375	1.07	0.094	1.342	1.313	1.34	1.346
0.838194	1.072	0.094	1.342	1.314	1.342	1.346
0.838889	1.071	0.097	1.343	1.314	1.342	1.35
0.839583	1.071	0.097	1.343	1.315	1.343	1.351
0.840278	1.07	0.094	1.343	1.317	1.345	1.352
0.840972	1.068	0.096	1.345	1.318	1.345	1.353
0.841667	1.068	0.097	1.345	1.319	1.345	1.354
0.842361	1.067	0.099	1.346	1.32	1.345	1.356
0.843056	1.067	0.098	1.346	1.32	1.345	1.357
0.84375	1.069	0.097	1.346	1.321	1.346	1.358
0.844444	1.068	0.098	1.346	1.323	1.346	1.359
0.845139	1.07	0.098	1.347	1.325	1.347	1.36
0.845833	1.07	0.097	1.35	1.326	1.348	1.362
0.846528	1.068	0.096	1.351	1.33	1.348	1.362
0.847222	1.07	0.095	1.351	1.33	1.348	1.363
0.847917	1.07	0.096	1.352	1.331	1.348	1.363
0.848611	1.07	0.094	1.352	1.332	1.35	1.364
0.849306	1.07	0.094	1.352	1.332	1.352	1.366
0.85	1.07	0.093	1.353	1.333	1.352	1.366
0.850694	1.069	0.094	1.356	1.333	1.352	1.369
0.851389	1.068	0.091	1.356	1.334	1.352	1.369
0.852083	1.068	0.09	1.358	1.335	1.353	1.37
0.852778	1.069	0.092	1.359	1.335	1.354	1.37
0.853472	1.069	0.089	1.359	1.337	1.357	1.37
0.854167	1.067	0.088	1.359	1.339	1.358	1.37
0.854861	1.067	0.086	1.359	1.342	1.358	1.371
0.855556	1.068	0.088	1.36	1.343	1.358	1.372
0.85625	1.067	0.087	1.36	1.343	1.358	1.373
0.856944	1.066	0.086	1.36	1.345	1.361	1.376
0.857639	1.067	0.086	1.36	1.346	1.363	1.377
0.858333	1.067	0.088	1.36	1.346	1.364	1.377
0.859028	1.066	0.088	1.36	1.348	1.364	1.377
0.859722	1.066	0.087	1.361	1.351	1.366	1.378
0.860417	1.067	0.087	1.361	1.352	1.366	1.378
0.861111	1.068	0.086	1.361	1.353	1.366	1.378
0.861806	1.067	0.086	1.362	1.354	1.367	1.378
0.8625	1.068	0.086	1.362	1.356	1.367	1.378
0.863194	1.068	0.089	1.362	1.356	1.368	1.379
0.863889	1.07	0.087	1.363	1.357	1.368	1.379
0.864583	1.07	0.085	1.364	1.357	1.369	1.381
0.865278	1.07	0.086	1.365	1.357	1.37	1.382
0.865972	1.069	0.083	1.365	1.357	1.37	1.383
0.866667	1.068	0.084	1.366	1.358	1.37	1.384
0.867361	1.07	0.083	1.366	1.359	1.371	1.386
0.868056	1.069	0.082	1.367	1.361	1.371	1.386
0.86875	1.07	0.083	1.368	1.362	1.372	1.386
0.869444	1.068	0.082	1.371	1.364	1.373	1.386
0.870139	1.066	0.081	1.373	1.364	1.373	1.387
0.870833	1.07	0.082	1.374	1.366	1.374	1.389
0.871528	1.07	0.081	1.376	1.366	1.374	1.39
0.872222	1.068	0.081	1.378	1.366	1.377	1.39
0.872917	1.068	0.082	1.378	1.368	1.377	1.39
0.873611	1.068	0.081	1.379	1.368	1.377	1.39
0.874306	1.069	0.08	1.38	1.369	1.378	1.39
0.875	1.07	0.083	1.381	1.37	1.38	1.39
0.875694	1.07	0.082	1.381	1.37	1.382	1.391
0.876389	1.072	0.079	1.383	1.371	1.383	1.391
0.877083	1.072	0.077	1.385	1.372	1.384	1.392
0.877778	1.072	0.078	1.386	1.374	1.386	1.392
0.878472	1.074	0.077	1.386	1.375	1.388	1.393
0.879167	1.075	0.078	1.388	1.375	1.39	1.393
0.879861	1.074	0.076	1.388	1.375	1.39	1.393
0.880556	1.073	0.074	1.388	1.376	1.39	1.393
0.88125	1.072	0.076	1.389	1.377	1.392	1.394
0.881944	1.075	0.075	1.39	1.378	1.393	1.394
0.882639	1.074	0.076	1.39	1.38	1.394	1.395
0.883333	1.075	0.074	1.39	1.381	1.395	1.398
0.884028	1.074	0.074	1.39	1.382	1.396	1.398
0.884722	1.074	0.074	1.39	1.382	1.396	1.398
0.885417	1.074	0.077	1.392	1.382	1.396	1.398
0.886111	1.074	0.078	1.393	1.382	1.397	1.398
0.886806	1.073	0.076	1.394	1.382	1.398	1.401
0.8875	1.07	0.074	1.395	1.382	1.4	1.401
0.888194	1.072	0.073	1.395	1.384	1.401	1.401
0.888889	1.073	0.071	1.396	1.386	1.402	1.401
0.889583	1.072	0.072	1.396	1.387	1.402	1.402
0.890278	1.074	0.07	1.398	1.389	1.402	1.403
0.890972	1.074	0.069	1.398	1.39	1.405	1.406
0.891667	1.075	0.069	1.398	1.39	1.406	1.407
0.892361	1.074	0.069	1.4	1.391	1.406	1.408
0.893056	1.077	0.069	1.401	1.394	1.406	1.409
0.89375	1.077	0.067	1.402	1.394	1.406	1.41
0.894444	1.077	0.067	1.406	1.394	1.406	1.411
0.895139	1.077	0.067	1.406	1.397	1.406	1.411
0.895833	1.077	0.067	1.406	1.398	1.406	1.413
0.896528	1.077	0.068	1.407	1.399	1.407	1.413
0.897222	1.078	0.068	1.409	1.402	1.408	1.413
0.897917	1.082	0.069	1.41	1.402	1.408	1.414
0.898611	1.082	0.067	1.41	1.403	1.409	1.414
0.899306	1.081	0.067	1.41	1.404	1.409	1.415
0.9	1.079	0.068	1.413	1.406	1.409	1.416
0.900694	1.079	0.066	1.412	1.406	1.409	1.417
0.901389	1.079	0.064	1.412	1.406	1.41	1.419
0.902083	1.078	0.063	1.413	1.406	1.41	1.42
0.902778	1.078	0.065	1.414	1.407	1.41	1.421
0.903472	1.081	0.066	1.414	1.408	1.41	1.422
0.904167	1.081	0.066	1.416	1.409	1.413	1.422
0.904861	1.081	0.069	1.417	1.41	1.415	1.424
0.905556	1.081	0.068	1.418	1.41	1.416	1.426
0.90625	1.082	0.068	1.42	1.412	1.417	1.426
0.906944	1.083	0.066	1.419	1.413	1.419	1.43
0.907639	1.083	0.066	1.419	1.414	1.419	1.43
0.908333	1.082	0.067	1.42	1.415	1.419	1.43
0.909028	1.082	0.067	1.421	1.416	1.42	1.43
0.909722	1.082	0.065	1.422	1.418	1.421	1.43
0.910417	1.082	0.065	1.422	1.418	1.421	1.431
0.911111	1.082	0.066	1.422	1.419	1.421	1.433
0.911806	1.078	0.066	1.423	1.419	1.422	1.434
0.9125	1.078	0.066	1.423	1.42	1.422	1.436
0.913194	1.077	0.07	1.423	1.421	1.423	1.438
0.913889	1.077	0.07	1.424	1.421	1.423	1.439
0.914583	1.077	0.072	1.425	1.422	1.425	1.439
0.915278	1.077	0.072	1.426	1.422	1.425	1.439
0.915972	1.077	0.07	1.426	1.422	1.426	1.439
0.916667	1.075	0.071	1.426	1.423	1.426	1.441
0.917361	1.074	0.074	1.426	1.424	1.43	1.444
0.918056	1.074	0.078	1.426	1.425	1.433	1.444
0.91875	1.073	0.077	1.428	1.426	1.434	1.446
0.919444	1.073	0.074	1.428	1.427	1.435	1.446
0.920139	1.073	0.077	1.428	1.428	1.437	1.446
0.920833	1.073	0.075	1.428	1.428	1.437	1.446
0.921528	1.071	0.074	1.429	1.429	1.438	1.447
0.922222	1.074	0.072	1.429	1.43	1.439	1.447
0.922917	1.074	0.071	1.429	1.431	1.44	1.448
0.923611	1.074	0.071	1.43	1.434	1.441	1.452
0.924306	1.074	0.07	1.43	1.438	1.442	1.453
0.925	1.075	0.07	1.43	1.44	1.444	1.454
0.925694	1.075	0.071	1.43	1.441	1.445	1.454
0.926389	1.074	0.07	1.431	1.442	1.446	1.454
0.927083	1.074	0.069	1.433	1.443	1.446	1.454
0.927778	1.072	0.072	1.433	1.443	1.447	1.454
0.928472	1.07	0.073	1.434	1.444	1.448	1.454
0.929167	1.071	0.071	1.436	1.446	1.449	1.455
0.929861	1.068	0.072	1.439	1.448	1.449	1.456
0.930556	1.066	0.073	1.44	1.448	1.45	1.456
0.93125	1.067	0.074	1.443	1.45	1.45	1.456
0.931944	1.066	0.074	1.443	1.45	1.45	1.456
0.932639	1.067	0.075	1.443	1.45	1.45	1.457
0.933333	1.068	0.076	1.443	1.452	1.452	1.458
0.934028	1.066	0.078	1.445	1.453	1.454	1.459
0.934722	1.066	0.079	1.446	1.454	1.455	1.459
0.935417	1.067	0.077	1.446	1.454	1.456	1.46
0.936111	1.064	0.078	1.447	1.454	1.456	1.464
0.936806	1.066	0.078	1.448	1.455	1.456	1.464
0.9375	1.066	0.078	1.45	1.458	1.456	1.464
0.938194	1.068	0.078	1.45	1.458	1.458	1.466
0.938889	1.068	0.075	1.452	1.458	1.461	1.466
0.939583	1.07	0.075	1.452	1.458	1.462	1.468
0.940278	1.069	0.074	1.453	1.46	1.462	1.469
0.940972	1.07	0.075	1.453	1.46	1.462	1.47
0.941667	1.073	0.073	1.454	1.46	1.465	1.473
0.942361	1.072	0.073	1.457	1.46	1.465	1.474
0.943056	1.073	0.072	1.458	1.46	1.465	1.474
0.94375	1.073	0.073	1.459	1.461	1.465	1.475
0.944444	1.071	0.074	1.46	1.461	1.466	1.477
0.945139	1.073	0.072	1.461	1.463	1.466	1.479
0.945833	1.074	0.07	1.464	1.463	1.466	1.482
0.946528	1.072	0.069	1.465	1.463	1.466	1.482
0.947222	1.07	0.066	1.466	1.465	1.468	1.482
0.947917	1.07	0.062	1.466	1.466	1.47	1.484
0.948611	1.068	0.062	1.466	1.467	1.471	1.484
0.949306	1.068	0.063	1.467	1.467	1.472	1.485
0.95	1.068	0.062	1.468	1.468	1.472	1.485
0.950694	1.069	0.062	1.469	1.468	1.474	1.486
0.951389	1.07	0.06	1.47	1.47	1.474	1.488
0.952083	1.07	0.061	1.47	1.47	1.474	1.49
0.952778	1.071	0.06	1.47	1.47	1.474	1.49
0.953472	1.067	0.059	1.471	1.472	1.474	1.491
0.954167	1.066	0.058	1.472	1.473	1.474	1.491
0.954861	1.066	0.058	1.473	1.474	1.475	1.491
0.955556	1.065	0.057	1.473	1.474	1.475	1.492
0.95625	1.063	0.055	1.473	1.475	1.476	1.492
0.956944	1.062	0.057	1.472	1.476	1.478	1.493
0.957639	1.062	0.056	1.472	1.477	1.479	1.493
0.958333	1.062	0.056	1.472	1.479	1.48	1.494
0.959028	1.06	0.056	1.474	1.482	1.48	1.495
0.959722	1.059	0.055	1.474	1.482	1.48	1.495
0.960417	1.058	0.056	1.475	1.482	1.481	1.496
0.961111	1.059	0.056	1.475	1.484	1.482	1.496
0.961806	1.058	0.054	1.476	1.485	1.482	1.499
0.9625	1.056	0.056	1.476	1.486	1.482	1.5
0.963194	1.055	0.054	1.476	1.486	1.482	1.501
0.963889	1.057	0.055	1.476	1.487	1.483	1.501
0.964583	1.058	0.055	1.476	1.487	1.485	1.502
0.965278	1.057	0.058	1.477	1.488	1.486	1.502
0.965972	1.056	0.056	1.478	1.489	1.486	1.504
0.966667	1.055	0.056	1.48	1.49	1.486	1.504
0.967361	1.052	0.056	1.481	1.49	1.486	1.506
0.968056	1.052	0.054	1.481	1.492	1.487	1.506
0.96875	1.05	0.058	1.482	1.492	1.49	1.506
0.969444	1.05	0.058	1.482	1.493	1.491	1.508
0.970139	1.047	0.057	1.483	1.494	1.492	1.508
0.970833	1.046	0.058	1.483	1.495	1.493	1.509
0.971528	1.048	0.058	1.484	1.496	1.493	1.51
0.972222	1.048	0.057	1.484	1.497	1.495	1.512
0.972917	1.047	0.057	1.483	1.498	1.497	1.512
0.973611	1.048	0.058	1.483	1.498	1.498	1.515
0.974306	1.05	0.062	1.484	1.499	1.498	1.515
0.975	1.051	0.062	1.484	1.5	1.498	1.517
0.975694	1.052	0.064	1.485	1.501	1.498	1.518
0.976389	1.051	0.064	1.486	1.503	1.499	1.519
0.977083	1.053	0.067	1.486	1.505	1.499	1.519
0.977778	1.053	0.069	1.488	1.506	1.5	1.519
0.978472	1.053	0.07	1.49	1.506	1.501	1.521
0.979167	1.053	0.068	1.49	1.507	1.501	1.521
0.979861	1.052	0.064	1.49	1.508	1.501	1.523
0.980556	1.054	0.066	1.49	1.508	1.502	1.524
0.98125	1.053	0.065	1.491	1.509	1.502	1.526
0.981944	1.053	0.062	1.491	1.512	1.503	1.527
0.982639	1.051	0.058	1.492	1.513	1.505	1.528
0.983333	1.05	0.058	1.493	1.515	1.505	1.53
0.984028	1.05	0.058	1.493	1.515	1.506	1.531
0.984722	1.05	0.057	1.493	1.517	1.506	1.533
0.985417	1.052	0.06	1.493	1.518	1.506	1.533
0.986111	1.051	0.062	1.494	1.518	1.507	1.533
0.986806	1.051	0.061	1.495	1.519	1.509	1.533
0.9875	1.05	0.062	1.495	1.52	1.51	1.534
0.988194	1.05	0.062	1.496	1.522	1.511	1.535
0.988889	1.049	0.061	1.497	1.521	1.514	1.536
0.989583	1.049	0.061	1.499	1.521	1.514	1.538
0.990278	1.05	0.06	1.499	1.524	1.515	1.538
0.990972	1.048	0.059	1.501	1.526	1.516	1.538
0.991667	1.047	0.058	1.501	1.526	1.516	1.54
0.992361	1.048	0.057	1.502	1.527	1.518	1.541
0.993056	1.049	0.058	1.502	1.528	1.518	1.542
0.99375	1.05	0.055	1.503	1.529	1.518	1.542
0.994444	1.05	0.054	1.503	1.53	1.518	1.546
0.995139	1.05	0.054	1.505	1.531	1.52	1.547
0.995833	1.05	0.054	1.507	1.531	1.521	1.547
0.996528	1.051	0.056	1.509	1.532	1.523	1.548
0.997222	1.049	0.056	1.509	1.532	1.525	1.549
0.997917	1.05	0.058	1.51	1.532	1.525	1.549
0.998611	1.05	0.056	1.51	1.533	1.525	1.55
0.999306	1.05	0.054	1.51	1.533	1.525	1.551
1	1.05	0.053	1.511	1.537	1.526	1.551
1.00069	1.05	0.054	1.511	1.538	1.527	1.551
1.00139	1.05	0.053	1.51	1.539	1.528	1.552
1.00208	1.049	0.054	1.51	1.541	1.529	1.555
1.00278	1.049	0.055	1.51	1.541	1.53	1.556
1.00347	1.049	0.054	1.51	1.541	1.531	1.557
1.00417	1.05	0.054	1.51	1.541	1.531	1.557
1.00486	1.05	0.056	1.512	1.542	1.532	1.558
1.00556	1.05	0.055	1.512	1.542	1.534	1.559
1.00625	1.05	0.054	1.514	1.542	1.534	1.562
1.00694	1.048	0.051	1.514	1.543	1.534	1.563
1.00764	1.046	0.05	1.514	1.545	1.535	1.564
1.00833	1.046	0.046	1.515	1.546	1.535	1.564
1.00903	1.044	0.047	1.517	1.548	1.537	1.566
1.00972	1.045	0.048	1.516	1.549	1.537	1.566
1.01042	1.046	0.047	1.516	1.549	1.538	1.568
1.01111	1.045	0.046	1.517	1.55	1.538	1.569
1.01181	1.043	0.046	1.518	1.55	1.538	1.569
1.0125	1.043	0.046	1.518	1.55	1.539	1.57
1.01319	1.042	0.049	1.519	1.55	1.54	1.57
1.01389	1.038	0.048	1.52	1.551	1.54	1.571
1.01458	1.039	0.046	1.52	1.552	1.541	1.571
1.01528	1.038	0.046	1.521	1.553	1.542	1.571
1.01597	1.038	0.044	1.522	1.553	1.544	1.573
1.01667	1.04	0.046	1.522	1.554	1.545	1.573
1.01736	1.042	0.046	1.524	1.554	1.545	1.573
1.01806	1.044	0.046	1.525	1.555	1.546	1.574
1.01875	1.044	0.046	1.525	1.556	1.547	1.576
1.01944	1.041	0.046	1.527	1.557	1.549	1.578
1.02014	1.042	0.046	1.527	1.558	1.55	1.579
1.02083	1.041	0.045	1.528	1.558	1.552	1.58
1.02153	1.039	0.046	1.529	1.561	1.554	1.581
1.02222	1.043	0.046	1.529	1.562	1.554	1.582
1.02292	1.042	0.047	1.529	1.563	1.554	1.583
1.02361	1.042	0.046	1.53	1.564	1.554	1.585
1.02431	1.042	0.043	1.529	1.564	1.556	1.586
1.025	1.041	0.043	1.53	1.566	1.557	1.588
1.02569	1.04	0.045	1.531	1.567	1.558	1.59
1.02639	1.041	0.043	1.534	1.567	1.558	1.591
1.02708	1.04	0.046	1.535	1.567	1.559	1.592
1.02778	1.04	0.046	1.535	1.569	1.562	1.593
1.02847	1.041	0.046	1.536	1.569	1.562	1.594
1.02917	1.04	0.045	1.537	1.569	1.563	1.594
1.02986	1.038	0.047	1.538	1.571	1.563	1.594
1.03056	1.037	0.05	1.538	1.572	1.564	1.595
1.03125	1.035	0.051	1.538	1.572	1.564	1.596
1.03194	1.034	0.051	1.539	1.572	1.564	1.596
1.03264	1.035	0.051	1.539	1.573	1.564	1.598
1.03333	1.036	0.05	1.54	1.574	1.565	1.599
1.03403	1.037	0.051	1.541	1.574	1.566	1.599
1.03472	1.038	0.049	1.541	1.574	1.567	1.601
1.03542	1.038	0.048	1.542	1.574	1.568	1.602
1.03611	1.039	0.049	1.542	1.576	1.569	1.604
1.03681	1.038	0.046	1.546	1.577	1.57	1.605
1.0375	1.04	0.044	1.546	1.578	1.571	1.606
1.03819	1.041	0.042	1.548	1.58	1.572	1.608
1.03889	1.042	0.038	1.547	1.582	1.572	1.61
1.03958	1.042	0.038	1.55	1.583	1.572	1.612
1.04028	1.042	0.038	1.552	1.584	1.572	1.615
1.04097	1.043	0.038	1.554	1.584	1.571	1.616
1.04167	1.044	0.038	1.554	1.584	1.571	1.616
1.04236	1.042	0.038	1.554	1.586	1.571	1.616
1.04306	1.043	0.039	1.555	1.586	1.572	1.617
1.04375	1.041	0.039	1.556	1.586	1.574	1.618
1.04444	1.041	0.04	1.557	1.589	1.574	1.618
1.04514	1.041	0.041	1.558	1.589	1.576	1.62
1.04583	1.042	0.04	1.558	1.59	1.577	1.62
1.04653	1.042	0.039	1.558	1.594	1.578	1.621
1.04722	1.041	0.037	1.558	1.595	1.578	1.622
1.04792	1.04	0.038	1.558	1.596	1.578	1.626
1.04861	1.04	0.039	1.559	1.597	1.578	1.626
1.04931	1.04	0.041	1.559	1.598	1.578	1.626
1.05	1.04	0.041	1.56	1.599	1.578	1.627
1.05069	1.038	0.04	1.562	1.599	1.578	1.627
1.05139	1.038	0.042	1.562	1.601	1.58	1.627
1.05208	1.037	0.042	1.562	1.603	1.58	1.627
1.05278	1.035	0.044	1.561	1.605	1.581	1.63
1.05347	1.035	0.042	1.563	1.607	1.581	1.631
1.05417	1.035	0.043	1.565	1.608	1.581	1.634
1.05486	1.035	0.046	1.565	1.609	1.582	1.635
1.05556	1.036	0.046	1.565	1.61	1.582	1.635
1.05625	1.034	0.046	1.565	1.612	1.584	1.637
1.05694	1.034	0.046	1.566	1.614	1.584	1.637
1.05764	1.036	0.044	1.566	1.614	1.584	1.638
1.05833	1.033	0.042	1.566	1.614	1.585	1.638
1.05903	1.03	0.042	1.566	1.614	1.586	1.638
1.05972	1.026	0.044	1.566	1.615	1.586	1.64
1.06042	1.03	0.043	1.567	1.615	1.586	1.64
1.06111	1.033	0.043	1.568	1.615	1.587	1.642
1.06181	1.032	0.042	1.569	1.616	1.59	1.642
1.0625	1.031	0.041	1.571	1.618	1.592	1.643
1.06319	1.031	0.043	1.573	1.618	1.592	1.645
1.06389	1.031	0.043	1.574	1.618	1.594	1.645
1.06458	1.032	0.043	1.574	1.619	1.594	1.645
1.06528	1.033	0.044	1.576	1.622	1.596	1.645
1.06597	1.032	0.045	1.578	1.622	1.596	1.646
1.06667	1.033	0.042	1.579	1.622	1.596	1.646
1.06736	1.034	0.043	1.581	1.622	1.596	1.648
1.06806	1.033	0.044	1.582	1.623	1.596	1.648
1.06875	1.034	0.044	1.583	1.625	1.597	1.649
1.06944	1.034	0.046	1.585	1.626	1.598	1.65
1.07014	1.033	0.048	1.586	1.627	1.598	1.652
1.07083	1.033	0.048	1.587	1.627	1.598	1.653
1.07153	1.03	0.046	1.588	1.627	1.6	1.654
1.07222	1.03	0.047	1.588	1.629	1.601	1.655
1.07292	1.03	0.047	1.589	1.63	1.602	1.657
1.07361	1.03	0.047	1.589	1.631	1.602	1.659
1.07431	1.03	0.046	1.59	1.631	1.602	1.66
1.075	1.031	0.046	1.59	1.633	1.602	1.66
1.07569	1.032	0.045	1.59	1.634	1.604	1.66
1.07639	1.032	0.047	1.59	1.634	1.606	1.661
1.07708	1.033	0.047	1.59	1.636	1.606	1.661
1.07778	1.033	0.046	1.594	1.636	1.607	1.662
1.07847	1.031	0.046	1.595	1.638	1.607	1.662
1.07917	1.031	0.047	1.597	1.64	1.607	1.663
1.07986	1.031	0.046	1.598	1.642	1.608	1.664
1.08056	1.03	0.044	1.601	1.643	1.608	1.665
1.08125	1.03	0.043	1.602	1.645	1.609	1.666
1.08194	1.03	0.042	1.602	1.645	1.611	1.667
1.08264	1.026	0.041	1.603	1.646	1.611	1.668
1.08333	1.026	0.042	1.603	1.646	1.612	1.668
1.08403	1.026	0.04	1.604	1.647	1.612	1.669
1.08472	1.025	0.042	1.605	1.647	1.613	1.671
1.08542	1.026	0.041	1.606	1.647	1.614	1.673
1.08611	1.025	0.041	1.606	1.648	1.614	1.674
1.08681	1.025	0.042	1.608	1.649	1.615	1.674
1.0875	1.026	0.042	1.608	1.65	1.617	1.675
1.08819	1.026	0.044	1.61	1.65	1.617	1.676
1.08889	1.027	0.045	1.61	1.65	1.618	1.677
1.08958	1.026	0.045	1.61	1.65	1.618	1.678
1.09028	1.028	0.045	1.609	1.651	1.618	1.678
1.09097	1.03	0.042	1.61	1.651	1.618	1.678
1.09167	1.028	0.042	1.612	1.651	1.618	1.679
1.09236	1.027	0.044	1.612	1.651	1.619	1.679
1.09306	1.026	0.043	1.612	1.653	1.619	1.679
1.09375	1.026	0.042	1.612	1.653	1.62	1.679
1.09444	1.024	0.042	1.614	1.654	1.62	1.68
1.09514	1.022	0.043	1.614	1.654	1.619	1.681
1.09583	1.02	0.042	1.616	1.654	1.619	1.682
1.09653	1.02	0.044	1.617	1.657	1.62	1.682
1.09722	1.019	0.042	1.618	1.657	1.623	1.684
1.09792	1.018	0.041	1.618	1.657	1.625	1.684
1.09861	1.017	0.04	1.618	1.657	1.626	1.685
1.09931	1.014	0.04	1.619	1.657	1.627	1.685
1.1	1.014	0.04	1.62	1.657	1.628	1.685
1.10069	1.014	0.04	1.621	1.658	1.628	1.686
1.10139	1.011	0.042	1.622	1.658	1.628	1.687
1.10208	1.01	0.042	1.622	1.658	1.63	1.69
1.10278	1.008	0.039	1.623	1.659	1.631	1.69
1.10347	1.008	0.038	1.623	1.659	1.631	1.69
1.10417	1.006	0.04	1.626	1.659	1.631	1.692
1.10486	1.005	0.042	1.626	1.662	1.632	1.693
1.10556	1.006	0.042	1.625	1.662	1.636	1.694
1.10625	1.006	0.042	1.625	1.662	1.639	1.694
1.10694	1.004	0.042	1.626	1.662	1.641	1.695
1.10764	1.001	0.043	1.626	1.664	1.642	1.696
1.10833	1.002	0.043	1.627	1.664	1.642	1.697
1.10903	1.002	0.046	1.628	1.664	1.643	1.698
1.10972	1	0.046	1.629	1.665	1.643	1.699
1.11042	1.002	0.045	1.629	1.665	1.644	1.699
1.11111	1.002	0.044	1.63	1.667	1.646	1.702
1.11181	1.002	0.045	1.631	1.669	1.646	1.703
1.1125	1.002	0.046	1.633	1.669	1.648	1.703
1.11319	1.002	0.045	1.633	1.67	1.649	1.704
1.11389	1.002	0.046	1.634	1.67	1.65	1.704
1.11458	1.002	0.045	1.635	1.67	1.65	1.705
1.11528	1.001	0.045	1.637	1.67	1.65	1.707
1.11597	0.999	0.044	1.637	1.671	1.651	1.708
1.11667	1.001	0.045	1.638	1.673	1.652	1.71
1.11736	1.002	0.045	1.638	1.673	1.652	1.71
1.11806	1.001	0.043	1.638	1.673	1.653	1.71
1.11875	1.001	0.042	1.638	1.673	1.654	1.711
1.11944	1	0.043	1.638	1.673	1.654	1.712
1.12014	1	0.042	1.638	1.673	1.654	1.713
1.12083	1.001	0.039	1.638	1.674	1.655	1.713
1.12153	1.001	0.038	1.638	1.676	1.655	1.714
1.12222	1.001	0.039	1.64	1.677	1.656	1.714
1.12292	1	0.039	1.642	1.678	1.657	1.714
1.12361	0.998	0.037	1.642	1.678	1.657	1.715
1.12431	0.998	0.038	1.642	1.678	1.657	1.715
1.125	1	0.04	1.643	1.68	1.657	1.715
1.12569	1.001	0.041	1.644	1.681	1.66	1.717
1.12639	1	0.044	1.644	1.682	1.661	1.718
1.12708	1	0.045	1.646	1.683	1.662	1.718
1.12778	0.999	0.045	1.646	1.685	1.662	1.72
1.12847	0.998	0.044	1.646	1.685	1.664	1.722
1.12917	0.998	0.042	1.646	1.685	1.664	1.722
1.12986	0.998	0.045	1.646	1.686	1.665	1.723
1.13056	0.997	0.046	1.645	1.686	1.667	1.723
1.13125	0.996	0.045	1.645	1.686	1.667	1.723
1.13194	0.997	0.042	1.645	1.686	1.668	1.723
1.13264	0.998	0.044	1.645	1.688	1.668	1.724
1.13333	0.998	0.044	1.646	1.689	1.669	1.728
1.13403	0.998	0.04	1.647	1.692	1.67	1.73
1.13472	0.998	0.041	1.648	1.692	1.672	1.73
1.13542	0.999	0.037	1.649	1.692	1.673	1.73
1.13611	0.999	0.036	1.649	1.693	1.673	1.731
1.13681	1.001	0.035	1.65	1.694	1.674	1.732
1.1375	0.999	0.038	1.65	1.696	1.675	1.733
1.13819	1.001	0.036	1.651	1.697	1.676	1.733
1.13889	1.002	0.038	1.652	1.699	1.678	1.733
1.13958	1.002	0.038	1.652	1.7	1.679	1.734
1.14028	1.001	0.038	1.653	1.702	1.682	1.734
1.14097	1	0.038	1.653	1.702	1.682	1.736
1.14167	0.998	0.039	1.652	1.702	1.682	1.737
1.14236	0.998	0.039	1.654	1.705	1.685	1.738
1.14306	0.998	0.039	1.654	1.705	1.686	1.739
1.14375	0.995	0.04	1.654	1.706	1.686	1.741
1.14444	0.996	0.038	1.655	1.707	1.687	1.742
1.14514	0.995	0.038	1.657	1.707	1.687	1.742
1.14583	0.997	0.04	1.658	1.708	1.688	1.744
1.14653	0.995	0.039	1.658	1.709	1.688	1.744
1.14722	0.994	0.038	1.658	1.709	1.688	1.744
1.14792	0.994	0.038	1.658	1.709	1.689	1.744
1.14861	0.994	0.038	1.66	1.71	1.689	1.745
1.14931	0.992	0.042	1.661	1.71	1.69	1.746
1.15	0.991	0.042	1.662	1.711	1.691	1.749
1.15069	0.99	0.042	1.662	1.711	1.692	1.749
1.15139	0.985	0.042	1.662	1.711	1.692	1.749
1.15208	0.984	0.041	1.663	1.711	1.693	1.75
1.15278	0.982	0.042	1.665	1.711	1.693	1.751
1.15347	0.982	0.042	1.665	1.713	1.693	1.751
1.15417	0.982	0.043	1.666	1.714	1.693	1.753
1.15486	0.983	0.041	1.666	1.714	1.694	1.754
1.15556	0.984	0.038	1.667	1.714	1.697	1.754
1.15625	0.985	0.038	1.669	1.715	1.699	1.754
1.15694	0.983	0.041	1.67	1.715	1.701	1.754
1.15764	0.983	0.04	1.671	1.716	1.702	1.755
1.15833	0.984	0.042	1.671	1.717	1.703	1.757
1.15903	0.985	0.042	1.671	1.718	1.703	1.758
1.15972	0.984	0.043	1.671	1.72	1.704	1.759
1.16042	0.983	0.043	1.672	1.721	1.706	1.759
1.16111	0.984	0.045	1.672	1.721	1.706	1.76
1.16181	0.986	0.047	1.673	1.721	1.706	1.762
1.1625	0.983	0.046	1.672	1.721	1.706	1.763
1.16319	0.984	0.048	1.674	1.722	1.706	1.764
1.16389	0.984	0.046	1.673	1.725	1.708	1.766
1.16458	0.983	0.046	1.673	1.725	1.708	1.767
1.16528	0.981	0.045	1.676	1.726	1.709	1.769
1.16597	0.979	0.046	1.676	1.726	1.711	1.769
1.16667	0.979	0.047	1.677	1.728	1.712	1.77
1.16736	0.979	0.049	1.678	1.729	1.712	1.77
1.16806	0.976	0.05	1.68	1.73	1.712	1.77
1.16875	0.975	0.054	1.682	1.73	1.713	1.772
1.16944	0.974	0.052	1.683	1.731	1.715	1.774
1.17014	0.974	0.05	1.686	1.731	1.716	1.774
1.17083	0.974	0.05	1.686	1.732	1.716	1.776
1.17153	0.975	0.051	1.688	1.732	1.716	1.777
1.17222	0.973	0.052	1.688	1.732	1.717	1.777
1.17292	0.971	0.054	1.689	1.732	1.717	1.778
1.17361	0.97	0.053	1.69	1.733	1.718	1.777
1.17431	0.969	0.049	1.69	1.735	1.718	1.778
1.175	0.968	0.048	1.69	1.737	1.718	1.778
1.17569	0.968	0.05	1.692	1.737	1.718	1.78
1.17639	0.967	0.049	1.693	1.738	1.719	1.78
1.17708	0.966	0.05	1.695	1.74	1.719	1.78
1.17778	0.964	0.049	1.696	1.741	1.721	1.78
1.17847	0.963	0.05	1.697	1.742	1.722	1.781
1.17917	0.961	0.048	1.697	1.743	1.723	1.782
1.17986	0.958	0.048	1.698	1.743	1.723	1.782
1.18056	0.958	0.047	1.7	1.744	1.723	1.784
1.18125	0.958	0.046	1.701	1.745	1.723	1.784
1.18194	0.957	0.044	1.702	1.745	1.724	1.786
1.18264	0.956	0.044	1.702	1.745	1.725	1.786
1.18333	0.954	0.045	1.702	1.748	1.726	1.787
1.18403	0.954	0.044	1.702	1.748	1.727	1.788
1.18472	0.954	0.044	1.702	1.748	1.727	1.789
1.18542	0.954	0.044	1.702	1.748	1.727	1.789
1.18611	0.952	0.043	1.703	1.752	1.727	1.789
1.18681	0.952	0.042	1.704	1.752	1.729	1.791
1.1875	0.954	0.042	1.705	1.752	1.73	1.793
1.18819	0.954	0.041	1.705	1.752	1.731	1.796
1.18889	0.953	0.041	1.706	1.752	1.733	1.798
1.18958	0.953	0.042	1.706	1.753	1.733	1.799
1.19028	0.954	0.04	1.706	1.754	1.733	1.799
1.19097	0.954	0.04	1.707	1.754	1.733	1.8
1.19167	0.954	0.038	1.71	1.754	1.733	1.803
1.19236	0.951	0.037	1.71	1.755	1.734	1.804
1.19306	0.95	0.034	1.71	1.758	1.734	1.806
1.19375	0.95	0.036	1.709	1.759	1.736	1.806
1.19444	0.949	0.035	1.71	1.76	1.737	1.806
1.19514	0.949	0.034	1.711	1.761	1.737	1.807
1.19583	0.95	0.033	1.711	1.763	1.737	1.809
1.19653	0.95	0.034	1.712	1.765	1.738	1.81
1.19722	0.951	0.034	1.713	1.765	1.738	1.81
1.19792	0.951	0.034	1.713	1.766	1.738	1.81
1.19861	0.951	0.034	1.713	1.766	1.738	1.812
1.19931	0.949	0.033	1.713	1.768	1.738	1.814
1.2	0.949	0.03	1.717	1.77	1.739	1.815
1.20069	0.949	0.03	1.717	1.77	1.74	1.816
1.20139	0.95	0.03	1.718	1.771	1.742	1.817
1.20208	0.949	0.029	1.718	1.771	1.742	1.817
1.20278	0.95	0.029	1.718	1.772	1.742	1.817
1.20347	0.95	0.03	1.72	1.772	1.742	1.818
1.20417	0.95	0.03	1.72	1.773	1.742	1.819
1.20486	0.948	0.029	1.719	1.774	1.742	1.821
1.20556	0.948	0.028	1.722	1.776	1.743	1.821
1.20625	0.946	0.027	1.723	1.776	1.745	1.821
1.20694	0.947	0.027	1.723	1.777	1.746	1.823
1.20764	0.946	0.028	1.723	1.779	1.746	1.825
1.20833	0.945	0.028	1.724	1.78	1.749	1.826
1.20903	0.945	0.03	1.725	1.78	1.75	1.826
1.20972	0.946	0.034	1.726	1.78	1.75	1.83
1.21042	0.945	0.033	1.727	1.78	1.75	1.831
1.21111	0.944	0.032	1.73	1.781	1.75	1.833
1.21181	0.945	0.032	1.731	1.781	1.752	1.833
1.2125	0.942	0.032	1.731	1.782	1.753	1.834
1.21319	0.943	0.034	1.732	1.786	1.754	1.834
1.21389	0.943	0.033	1.733	1.786	1.754	1.834
1.21458	0.944	0.033	1.734	1.788	1.757	1.836
1.21528	0.946	0.034	1.736	1.788	1.758	1.838
1.21597	0.946	0.035	1.736	1.789	1.758	1.838
1.21667	0.945	0.037	1.736	1.79	1.758	1.838
1.21736	0.945	0.034	1.738	1.793	1.76	1.84
1.21806	0.945	0.038	1.738	1.793	1.762	1.842
1.21875	0.944	0.037	1.739	1.793	1.762	1.842
1.21944	0.944	0.036	1.739	1.794	1.762	1.843
1.22014	0.942	0.035	1.739	1.794	1.762	1.843
1.22083	0.941	0.035	1.738	1.794	1.764	1.843
1.22153	0.938	0.036	1.74	1.795	1.765	1.846
1.22222	0.937	0.038	1.742	1.797	1.765	1.846
1.22292	0.935	0.037	1.742	1.798	1.766	1.847
1.22361	0.936	0.04	1.743	1.798	1.768	1.849
1.22431	0.937	0.042	1.744	1.798	1.769	1.85
1.225	0.941	0.041	1.744	1.798	1.77	1.85
1.22569	0.941	0.042	1.744	1.801	1.77	1.851
1.22639	0.939	0.043	1.745	1.802	1.77	1.854
1.22708	0.938	0.042	1.746	1.802	1.771	1.855
1.22778	0.937	0.046	1.746	1.803	1.773	1.855
1.22847	0.938	0.047	1.749	1.804	1.774	1.858
1.22917	0.935	0.046	1.75	1.806	1.775	1.858
1.22986	0.934	0.046	1.751	1.806	1.775	1.858
1.23056	0.934	0.043	1.751	1.806	1.777	1.859
1.23125	0.934	0.046	1.752	1.806	1.778	1.86
1.23194	0.934	0.049	1.754	1.807	1.778	1.861
1.23264	0.934	0.046	1.754	1.808	1.779	1.862
1.23333	0.934	0.046	1.755	1.809	1.78	1.862
1.23403	0.934	0.044	1.758	1.809	1.781	1.862
1.23472	0.934	0.046	1.759	1.81	1.782	1.863
1.23542	0.934	0.045	1.761	1.811	1.782	1.866
1.23611	0.933	0.044	1.762	1.814	1.784	1.866
1.23681	0.933	0.042	1.763	1.814	1.786	1.866
1.2375	0.932	0.042	1.763	1.814	1.786	1.866
1.23819	0.93	0.043	1.763	1.814	1.788	1.867
1.23889	0.93	0.043	1.763	1.815	1.788	1.868
1.23958	0.93	0.045	1.764	1.816	1.789	1.868
1.24028	0.929	0.044	1.766	1.816	1.789	1.869
1.24097	0.929	0.043	1.767	1.817	1.79	1.869
1.24167	0.929	0.043	1.769	1.817	1.79	1.869
1.24236	0.925	0.043	1.769	1.818	1.79	1.869
1.24306	0.926	0.038	1.77	1.818	1.79	1.87
1.24375	0.927	0.038	1.77	1.818	1.79	1.874
1.24444	0.927	0.038	1.772	1.82	1.791	1.874
1.24514	0.927	0.04	1.772	1.821	1.793	1.874
1.24583	0.927	0.04	1.774	1.821	1.794	1.874
1.24653	0.926	0.04	1.775	1.822	1.795	1.875
1.24722	0.925	0.04	1.775	1.822	1.797	1.878
1.24792	0.926	0.038	1.775	1.823	1.797	1.88
1.24861	0.927	0.038	1.776	1.823	1.798	1.88
1.24931	0.928	0.037	1.777	1.823	1.799	1.881
1.25	0.931	0.037	1.776	1.823	1.802	1.882
1.25069	0.932	0.038	1.777	1.823	1.802	1.882
1.25139	0.931	0.036	1.778	1.824	1.804	1.885
1.25208	0.93	0.037	1.778	1.825	1.805	1.885
1.25278	0.928	0.038	1.779	1.826	1.805	1.885
1.25347	0.926	0.036	1.781	1.826	1.806	1.886
1.25417	0.924	0.035	1.781	1.826	1.809	1.886
1.25486	0.926	0.035	1.781	1.827	1.809	1.886
1.25556	0.926	0.037	1.782	1.829	1.809	1.886
1.25625	0.924	0.034	1.782	1.829	1.809	1.886
1.25694	0.924	0.034	1.782	1.829	1.81	1.887
1.25764	0.922	0.035	1.782	1.83	1.81	1.887
1.25833	0.922	0.035	1.782	1.83	1.811	1.888
1.25903	0.921	0.038	1.782	1.83	1.811	1.888
1.25972	0.921	0.035	1.782	1.83	1.811	1.888
1.26042	0.918	0.036	1.783	1.832	1.812	1.89
1.26111	0.916	0.033	1.783	1.833	1.814	1.89
1.26181	0.916	0.033	1.785	1.833	1.814	1.891
1.2625	0.917	0.032	1.787	1.834	1.814	1.891
1.26319	0.918	0.032	1.786	1.834	1.814	1.891
1.26389	0.917	0.032	1.786	1.834	1.815	1.892
1.26458	0.917	0.03	1.787	1.837	1.816	1.892
1.26528	0.916	0.029	1.788	1.838	1.818	1.894
1.26597	0.917	0.03	1.789	1.841	1.82	1.895
1.26667	0.915	0.03	1.789	1.841	1.823	1.898
1.26736	0.915	0.034	1.79	1.842	1.823	1.898
1.26806	0.912	0.031	1.792	1.842	1.824	1.898
1.26875	0.913	0.031	1.792	1.842	1.825	1.898
1.26944	0.915	0.028	1.794	1.842	1.826	1.9
1.27014	0.914	0.029	1.795	1.844	1.826	1.901
1.27083	0.913	0.03	1.796	1.846	1.827	1.902
1.27153	0.913	0.029	1.796	1.846	1.827	1.902
1.27222	0.914	0.029	1.796	1.846	1.827	1.902
1.27292	0.913	0.029	1.798	1.847	1.83	1.904
1.27361	0.911	0.03	1.798	1.847	1.831	1.904
1.27431	0.911	0.03	1.801	1.846	1.832	1.904
1.275	0.911	0.031	1.801	1.846	1.834	1.905
1.27569	0.914	0.03	1.801	1.847	1.835	1.905
1.27639	0.915	0.029	1.801	1.847	1.835	1.907
1.27708	0.916	0.027	1.802	1.849	1.836	1.908
1.27778	0.915	0.03	1.802	1.85	1.837	1.91
1.27847	0.916	0.03	1.804	1.85	1.838	1.911
1.27917	0.914	0.029	1.805	1.852	1.839	1.911
1.27986	0.914	0.031	1.806	1.852	1.841	1.911
1.28056	0.913	0.031	1.806	1.852	1.842	1.912
1.28125	0.912	0.032	1.805	1.853	1.842	1.914
1.28194	0.912	0.034	1.806	1.854	1.843	1.914
1.28264	0.913	0.034	1.806	1.854	1.844	1.916
1.28333	0.912	0.034	1.806	1.854	1.845	1.916
1.28403	0.914	0.037	1.806	1.854	1.847	1.916
1.28472	0.914	0.038	1.807	1.854	1.848	1.916
1.28542	0.912	0.038	1.808	1.854	1.85	1.917
1.28611	0.911	0.037	1.809	1.854	1.852	1.918
1.28681	0.913	0.035	1.81	1.854	1.852	1.918
1.2875	0.912	0.037	1.812	1.855	1.854	1.92
1.28819	0.911	0.037	1.813	1.855	1.854	1.92
1.28889	0.909	0.038	1.814	1.856	1.856	1.922
1.28958	0.908	0.038	1.814	1.858	1.858	1.922
1.29028	0.906	0.038	1.815	1.858	1.858	1.923
1.29097	0.906	0.038	1.815	1.858	1.858	1.923
1.29167	0.907	0.04	1.815	1.859	1.858	1.923
1.29236	0.907	0.037	1.816	1.86	1.858	1.924
1.29306	0.903	0.036	1.817	1.861	1.859	1.924
1.29375	0.903	0.037	1.818	1.861	1.859	1.926
1.29444	0.902	0.035	1.819	1.861	1.86	1.927
1.29514	0.903	0.036	1.819	1.861	1.862	1.927
1.29583	0.904	0.035	1.819	1.862	1.864	1.93
1.29653	0.908	0.036	1.821	1.864	1.865	1.93
1.29722	0.907	0.039	1.822	1.864	1.865	1.93
1.29792	0.904	0.042	1.822	1.866	1.865	1.932
1.29861	0.902	0.041	1.822	1.866	1.865	1.934
1.29931	0.901	0.043	1.822	1.867	1.866	1.934
1.3	0.902	0.04	1.822	1.868	1.866	1.936
1.30069	0.902	0.038	1.823	1.868	1.866	1.938
1.30139	0.901	0.037	1.823	1.87	1.866	1.938
1.30208	0.902	0.035	1.823	1.872	1.866	1.94
1.30278	0.9	0.033	1.823	1.872	1.866	1.941
1.30347	0.898	0.033	1.825	1.872	1.867	1.942
1.30417	0.898	0.031	1.825	1.873	1.867	1.943
1.30486	0.899	0.032	1.825	1.874	1.868	1.943
1.30556	0.901	0.034	1.826	1.877	1.869	1.945
1.30625	0.901	0.034	1.827	1.878	1.87	1.946
1.30694	0.902	0.033	1.83	1.879	1.87	1.946
1.30764	0.902	0.035	1.83	1.88	1.871	1.947
1.30833	0.906	0.033	1.83	1.882	1.871	1.948
1.30903	0.906	0.036	1.83	1.882	1.871	1.95
1.30972	0.906	0.036	1.829	1.885	1.874	1.951
1.31042	0.906	0.035	1.829	1.886	1.874	1.954
1.31111	0.905	0.035	1.83	1.887	1.876	1.954
1.31181	0.904	0.035	1.83	1.887	1.876	1.955
1.3125	0.903	0.035	1.833	1.888	1.878	1.955
1.31319	0.905	0.036	1.835	1.888	1.878	1.956
1.31389	0.905	0.034	1.836	1.889	1.878	1.956
1.31458	0.903	0.032	1.838	1.89	1.879	1.958
1.31528	0.904	0.03	1.838	1.892	1.882	1.958
1.31597	0.9	0.03	1.838	1.892	1.883	1.959
1.31667	0.9	0.031	1.838	1.893	1.884	1.959
1.31736	0.898	0.031	1.841	1.893	1.885	1.959
1.31806	0.898	0.03	1.843	1.893	1.885	1.96
1.31875	0.897	0.03	1.843	1.893	1.887	1.96
1.31944	0.898	0.03	1.843	1.894	1.888	1.96
1.32014	0.896	0.029	1.843	1.894	1.889	1.962
1.32083	0.894	0.03	1.845	1.895	1.889	1.963
1.32153	0.891	0.031	1.846	1.895	1.89	1.963
1.32222	0.893	0.033	1.848	1.895	1.892	1.963
1.32292	0.893	0.033	1.849	1.895	1.894	1.963
1.32361	0.892	0.037	1.849	1.897	1.894	1.964
1.32431	0.891	0.035	1.85	1.897	1.894	1.964
1.325	0.891	0.036	1.85	1.897	1.894	1.967
1.32569	0.893	0.035	1.85	1.897	1.897	1.968
1.32639	0.895	0.035	1.85	1.897	1.897	1.969
1.32708	0.894	0.038	1.852	1.898	1.898	1.97
1.32778	0.894	0.038	1.852	1.898	1.898	1.97
1.32847	0.894	0.035	1.853	1.899	1.902	1.971
1.32917	0.893	0.034	1.854	1.899	1.902	1.973
1.32986	0.894	0.036	1.857	1.899	1.903	1.974
1.33056	0.894	0.038	1.857	1.9	1.905	1.974
1.33125	0.893	0.038	1.857	1.901	1.905	1.976
1.33194	0.892	0.038	1.856	1.902	1.905	1.977
1.33264	0.89	0.038	1.856	1.902	1.906	1.978
1.33333	0.89	0.04	1.856	1.902	1.906	1.978
1.33403	0.889	0.042	1.858	1.902	1.907	1.979
1.33472	0.89	0.039	1.859	1.902	1.908	1.979
1.33542	0.888	0.038	1.859	1.902	1.908	1.979
1.33611	0.889	0.038	1.86	1.902	1.909	1.979
1.33681	0.89	0.038	1.861	1.902	1.909	1.979
1.3375	0.889	0.036	1.861	1.902	1.909	1.982
1.33819	0.888	0.035	1.862	1.903	1.91	1.982
1.33889	0.886	0.036	1.862	1.904	1.91	1.982
1.33958	0.886	0.035	1.862	1.905	1.91	1.982
1.34028	0.885	0.035	1.863	1.905	1.91	1.982
1.34097	0.884	0.034	1.863	1.906	1.911	1.982
1.34167	0.882	0.035	1.864	1.907	1.911	1.984
1.34236	0.879	0.034	1.866	1.908	1.912	1.984
1.34306	0.879	0.032	1.866	1.909	1.912	1.985
1.34375	0.879	0.03	1.866	1.909	1.912	1.986
1.34444	0.88	0.031	1.866	1.91	1.914	1.986
1.34514	0.878	0.029	1.866	1.911	1.914	1.987
1.34583	0.878	0.027	1.867	1.911	1.914	1.988
1.34653	0.879	0.027	1.868	1.913	1.914	1.989
1.34722	0.876	0.028	1.869	1.913	1.915	1.99
1.34792	0.878	0.026	1.869	1.914	1.917	1.991
1.34861	0.877	0.028	1.868	1.914	1.918	1.993
1.34931	0.874	0.028	1.87	1.914	1.918	1.994
1.35	0.873	0.029	1.87	1.915	1.919	1.994
1.35069	0.874	0.029	1.872	1.917	1.919	1.994
1.35139	0.871	0.03	1.873	1.918	1.919	1.994
1.35208	0.871	0.031	1.874	1.918	1.922	1.994
1.35278	0.872	0.03	1.874	1.918	1.922	1.994
1.35347	0.872	0.03	1.874	1.918	1.922	1.995
1.35417	0.872	0.03	1.876	1.918	1.922	1.995
1.35486	0.87	0.031	1.876	1.919	1.922	1.997
1.35556	0.87	0.032	1.876	1.921	1.922	1.997
1.35625	0.865	0.033	1.875	1.923	1.922	1.998
1.35694	0.864	0.034	1.875	1.926	1.923	1.998
1.35764	0.864	0.035	1.876	1.926	1.923	1.999
1.35833	0.866	0.034	1.878	1.928	1.925	1.999
1.35903	0.865	0.031	1.878	1.93	1.926	2.001
1.35972	0.866	0.033	1.879	1.93	1.928	2.002
1.36042	0.865	0.034	1.878	1.93	1.928	2.002
1.36111	0.864	0.034	1.878	1.931	1.929	2.002
1.36181	0.864	0.036	1.878	1.93	1.929	2.002
1.3625	0.865	0.038	1.88	1.931	1.93	2.002
1.36319	0.869	0.039	1.881	1.931	1.93	2.002
1.36389	0.869	0.039	1.881	1.931	1.93	2.002
1.36458	0.868	0.037	1.88	1.933	1.931	2.002
1.36528	0.87	0.036	1.88	1.933	1.932	2.003
1.36597	0.87	0.036	1.88	1.934	1.934	2.003
1.36667	0.868	0.038	1.88	1.936	1.935	2.003
1.36736	0.868	0.036	1.88	1.937	1.935	2.006
1.36806	0.866	0.037	1.881	1.938	1.935	2.006
1.36875	0.865	0.035	1.881	1.938	1.935	2.008
1.36944	0.865	0.036	1.881	1.942	1.935	2.009
1.37014	0.866	0.033	1.88	1.944	1.936	2.01
1.37083	0.869	0.03	1.88	1.944	1.938	2.01
1.37153	0.87	0.033	1.881	1.945	1.938	2.012
1.37222	0.87	0.033	1.883	1.945	1.939	2.012
1.37292	0.87	0.035	1.884	1.946	1.939	2.012
1.37361	0.869	0.034	1.884	1.946	1.94	2.013
1.37431	0.868	0.032	1.885	1.946	1.94	2.013
1.375	0.867	0.03	1.885	1.947	1.942	2.014
1.37569	0.866	0.029	1.885	1.948	1.942	2.015
1.37639	0.867	0.028	1.885	1.949	1.943	2.016
1.37708	0.867	0.028	1.885	1.95	1.945	2.017
1.37778	0.866	0.027	1.885	1.95	1.946	2.017
1.37847	0.868	0.026	1.885	1.953	1.948	2.017
1.37917	0.868	0.026	1.886	1.954	1.948	2.019
1.37986	0.866	0.026	1.889	1.954	1.949	2.02
1.38056	0.866	0.024	1.889	1.954	1.95	2.021
1.38125	0.866	0.026	1.89	1.954	1.951	2.021
1.38194	0.866	0.026	1.891	1.954	1.951	2.023
1.38264	0.866	0.026	1.893	1.955	1.951	2.025
1.38333	0.867	0.026	1.894	1.955	1.953	2.026
1.38403	0.863	0.026	1.893	1.956	1.953	2.029
1.38472	0.862	0.027	1.893	1.958	1.954	2.029
1.38542	0.861	0.028	1.893	1.958	1.954	2.03
1.38611	0.857	0.027	1.894	1.958	1.954	2.03
1.38681	0.857	0.026	1.894	1.961	1.954	2.03
1.3875	0.854	0.028	1.894	1.961	1.956	2.03
[truncated: 41,202 more rows]

## Sheet: Figure 5B
	1	1e	4b3	43e	5p3	53e	2	2e	3	3e
1	0.4625	0.005038	0.204933	0.0290882	0	0.0182494	0	0.0165756	0	0.019889
4	0	0.00306311	0.295516	0.0190325	0.334985	0.0364319	0.295393	0.0131722	0.278935	0.029333
7	0.0125	0.00340136	0.0459641	0.0174066	0.629781	0.0487998	0.544173	0.0258086	0.454722	0.011052
10	0.04375	0.00681323					0.56477	0.00971354	0.655206	0.005307
14	0.04375	0.00829404	0	0.0127264	0.141256	0.0303067	0.663957	0.0102903	0.533172	0.014562
18	0.0125	0.00152113	0.0248879	0.00942178	0.125849	0.0461403	0.765854	0.0208594	0.676513	0.028819
21	0.0625	0.00491139	0.145516	0.0139205	0.396294	0.0157395	0.80271	0.00738041	0.776271	0.016373
25	1	0.0346435	1	0.0601995	0.776964	0.0474215	0.983198	0.0206425	0.953995	0.003868
28	0.01875	0.0078407	0.674439	0.078604	1	0.0750972	1	0.00830721	1	0.015653

[truncated: 5 more sheets: Figure 5C, Figure 5D, Figure 5E, Figure 5G, Figure 5H]
